# Supplementary material for: Genome-wide analysis of growth-regulating factors (GRFs) in Triticum aestivum
Source: PeerJ. 2021 Jan 19;9:e10701. doi: 10.7717/peerj.10701 (PMC7821759; doi:10.7717/peerj.10701)
Supplement: Table S1 [file peerj-09-10701-s001.xlsx]

## Sheet: Sheet1
Table S1 : GRF genes found in Arabidopsis thaliana, Oryza sativa, and Zea mays.
ID	Protein ID
AtGRF1	AT2G22840.1
AtGRF2	AT4G37740.1
AtGRF3	AT2G36400.1
AtGRF4	AT3G52910.1
AtGRF5	AT3G13960.1
AtGRF6	AT2G06200.1
AtGRF7	AT5G53660.1
AtGRF8	AT4G24150.1
AtGRF9	AT2G45480.1
OsGRF1	LOC_Os02g53690.1
OsGRF2	LOC_Os06g10310.1
OsGRF3	LOC_Os04g51190.1
OsGRF4	LOC_Os02g47280.1
OsGRF5	LOC_Os06g02560.1
OsGRF6	LOC_Os03g51970.1
OsGRF7	LOC_Os12g29980.1
OsGRF8	LOC_Os11g35030.1
OsGRF9	LOC_Os03g47140.1
OsGRF10	LOC_Os02g45570.1
OsGRF11	LOC_Os07g28430.1
OsGRF12	LOC_Os04g48510.1
ZmGRF1	GRMZM2G034876_P01
ZmGRF2	GRMZM2G099862_P01
ZmGRF3	GRMZM2G105335_P01
ZmGRF4	GRMZM2G004619_P01
ZmGRF5	GRMZM2G129147_P01
ZmGRF6	GRMZM2G041223_P01
ZmGRF7	GRMZM5G850129_P01
ZmGRF8	GRMZM2G033612_P01
ZmGRF9	GRMZM5G893117_P01
ZmGRF10	GRMZM2G096709_P01
ZmGRF11	GRMZM2G067743_P02
ZmGRF12	GRMZM2G119359_P01
ZmGRF13	GRMZM2G018414_P01
ZmGRF14	GRMZM2G098594_P01
