# Supplementary material for: Genome-wide analysis of growth-regulating factors (GRFs) in Triticum aestivum
Source: PeerJ. 2021 Jan 19;9:e10701. doi: 10.7717/peerj.10701 (PMC7821759; doi:10.7717/peerj.10701)
Supplement: Table S1 — qRT-PCR of the raw data on NaCl roots, mannitol roots, NaCl leaves and mannitol leaves. [file peerj-09-10701-s010.xlsx]

## Sheet: NaCl Root
NaCl Root
Time	Ta2291		TaGRF1-2B			△Ct					Average(△Ct)		Average(△Ct)					△△Ct					2^-△△Ct					Average(2^-△△Ct)	Stdeva
2h	21.6075	21.5697	27.6038	26.9775		5.99631	6.0341	5.37001	5.40781									2.08057	2.11836	1.45427	1.49207		0.236422	0.230308	0.364939	0.355501		0.296792	0.0733836
ck_2h	22.1783	22.2557	26.2647	26.0008		4.08643	4.00897	3.8225	3.74505		3.91574		3.91574	3.91574	3.91574	3.91574		0.170692	0.0932351	-0.0932351	-0.170692		0.888416	0.937418	1.06676	1.1256		1.00455	0.110328
4h	22.3922	21.5967	28.6351	28.5937		6.24285	7.03838	6.20147	6.997									2.22088	3.01641	2.17951	2.97503		0.21451	0.123586	0.220751	0.127182		0.171508	0.0533395
ck_4h	21.8371	21.8826	25.7908	25.9728		3.95373	3.90827	4.13567	4.09021		4.02197		4.02197	4.02197	4.02197	4.02197
8h	20.0018	19.5009	24.6648	24.4086		4.66301	5.16394	4.40674	4.90768									-0.460888	0.0400469	-0.717153	-0.216218		1.37639	0.972623	1.64393	1.16168		1.28866	0.288628
ck_8h	20.501	20.756	25.2871	26.2177		4.78612	4.53113	5.71666	5.46167		5.1239		5.1239	5.1239	5.1239	5.1239
12h	20.5564	20.6512	24.0185	24.4598		3.46203	3.36725	3.9034	3.80863									-1.0587	-1.15347	-0.61732	-0.712096		2.08305	2.22449	1.53402	1.63818		1.86994	0.335495
ck_12h	21.4185	21.3535	25.8062	26.0072		4.38774	4.45275	4.5887	4.6537		4.52072		4.52072	4.52072	4.52072	4.52072
24h	22.4333	22.4968	25.6137	26.4167		3.18041	3.11689	3.98337	3.91985									1.24657	1.18305	2.04953	1.98601		0.421449	0.440419	0.241562	0.252435		0.338966	0.106569
ck_24h	23.8331	22.6933	25.1471	25.2469		1.31405	2.45385	1.41383	2.55362		1.93384		1.93384	1.93384	1.93384	1.93384
96h	21.3955	21.3511	25.5956	25.619		4.20009	4.24453	4.22349	4.26793									-3.21165	-3.1672	-3.18825	-3.1438		9.26407	8.98304	9.11502	8.83851		9.05016	0.1819
ck_96h	21.1362	20.9067	28.4136	28.4528		7.27737	7.50686	7.3166	7.54609		7.41173		7.41173	7.41173	7.41173	7.41173
144h	21.2241	21.2809	26.7277	26.9018		5.50362	5.44684	5.67773	5.62096									0.700217	0.643443	0.874329	0.817555		0.61548	0.640183	0.545507	0.567403		0.592143	0.0433568
ck_144h	22.4393	22.5252	27.2431	27.3282		4.80384	4.7179	4.8889	4.80296		4.8034		4.8034	4.8034	4.8034	4.8034
Time	Ta2291		TaGRF1-2D			△Ct					Average(△Ct)		Average(△Ct)					△△Ct					2^-△△Ct					Average(2^-△△Ct)	Stdeva
2h	21.6075	21.5697	26.3291	25.4716		4.72156	4.75936	3.86407	3.90187									1.3929	1.43069	0.5354	0.573199		0.3808	0.370952	0.689967	0.672125		0.528461	0.176386
ck_2h	22.1783	22.2557	25.5061	25.5852		3.32787	3.25041	3.40693	3.32947		3.32867		3.32867	3.32867	3.32867	3.32867		-0.000802602	-0.0782599	0.0782599	0.000802602		1.00056	1.05574	0.947199	0.999444		1.00074	0.0443236
4h	22.3922	21.5967	27.3808	26.5693		4.98861	5.78413	4.17711	4.97263									1.64016	2.43568	0.828661	1.62418		0.320822	0.184837	0.563052	0.324393		0.348276	0.157231
ck_4h	21.8371	21.8826	25.3952	25.0214		3.55807	3.51262	3.18428	3.13883		3.34845		3.34845	3.34845	3.34845	3.34845
8h	20.0018	19.5009	23.3433	24.0855		3.34152	3.84245	4.08366	4.58459									-0.838278	-0.337343	-0.096139	0.404796		1.78792	1.26343	1.06891	0.755343		1.2189	0.43326
ck_8h	20.501	20.756	24.7099	24.9067		4.20889	3.9539	4.4057	4.15071		4.1798		4.1798	4.1798	4.1798	4.1798
12h	20.5564	20.6512	25.2696	26.0888		4.71315	4.61837	5.53233	5.43756									0.178727	0.0839511	0.997911	0.903135		0.883482	0.94347	0.500725	0.534724		0.7156	0.230215
ck_12h	21.4185	21.3535	26.0264	25.8144		4.6079	4.6729	4.39594	4.46095		4.53442		4.53442	4.53442	4.53442	4.53442
24h	22.4333	22.4968	26.1581	26.3122		3.7248	3.66129	3.87888	3.81536									-0.528544	-0.592063	-0.374465	-0.437984		1.44247	1.5074	1.29636	1.35471		1.40024	0.0933296
ck_24h	23.8331	22.6933	27.8981	27.1349		4.06508	5.20487	3.30182	4.44162		4.25335		4.25335	4.25335	4.25335	4.25335
96h	21.3955	21.3511	24.2845	24.2716		2.88899	2.93344	2.87605	2.92049									-1.37001	-1.32557	-1.38296	-1.33852		2.58473	2.50632	2.60803	2.52892		2.557	0.0473645
ck_96h	21.1362	20.9067	25.3543	25.2065		4.21816	4.44765	4.07036	4.29986		4.25901		4.25901	4.25901	4.25901	4.25901
144h	21.2241	21.2809	25.9418	25.8147		4.71769	4.66091	4.59062	4.53384									0.804925	0.748151	0.677852	0.621078		0.572392	0.595366	0.625095	0.650185		0.61076	0.0340045
ck_144h	22.4393	22.5252	26.4413	26.3488		4.00195	3.91601	3.90952	3.82358		3.91276		3.91276	3.91276	3.91276	3.91276
Time	Ta2291		TaGRF3-2B			△Ct					Average(△Ct)		Average(△Ct)					△△Ct					2^-△△Ct					Average(2^-△△Ct)	Stdeva
2h	21.6075	21.5697	32.1495	32.1544		10.542	10.5798	10.5468	10.5846									0.635424	0.673222	0.640279	0.678077		0.643752	0.627104	0.641589	0.624998		0.634361	0.00967403
ck_2h	22.1783	22.2557	32.0271	32.22		9.8488	9.77134	10.0418	9.96432		9.90656		9.90656	9.90656	9.90656	9.90656		-0.0577624	-0.13522	0.13522	0.0577624		1.04085	1.09826	0.910531	0.960753		1.0026	0.0833502
4h	22.3922	21.5967	34.2384	33.8052		11.8462	12.6417	11.413	12.2085									1.70466	2.50018	1.27146	2.06698		0.306794	0.176755	0.41424	0.238658		0.284112	0.101718
ck_4h	21.8371	21.8826	32.078	31.9248		10.2409	10.1955	10.0876	10.0422		10.1416		10.1416	10.1416	10.1416	10.1416
8h	20.0018	19.5009	30.8218	30.9747		10.82	11.3209	10.9729	11.4738									-1.53674	-1.0358	-1.38385	-0.882917		2.90137	2.05025	2.60964	1.8441		2.35134	0.488946
ck_8h	20.501	20.756	33.0607	32.9098		12.5597	12.3047	12.4087	12.1538		12.3567		12.3567	12.3567	12.3567	12.3567
12h	20.5564	20.6512	31.9717	31.8633		11.4153	11.3205	11.3069	11.2121									1.56771	1.47293	1.45927	1.36449		0.337343	0.360249	0.363678	0.388371		0.36241	0.0208854
ck_12h	21.4185	21.3535	31.3467	31.1205		9.92817	9.99318	9.70201	9.76701		9.84759		9.84759	9.84759	9.84759	9.84759
24h	22.4333	22.4968	30.5298	30.5252		8.09647	8.03295	8.09184	8.02832									-1.01187	-1.07539	-1.0165	-1.08001		2.01652	2.10729	2.023	2.11406		2.06522	0.0526278
ck_24h	23.8331	22.6933	31.9505	32.7925		8.11748	9.25728	8.9594	10.0992		9.10834		9.10834	9.10834	9.10834	9.10834
96h	21.3955	21.3511	33.6099	33.9703		12.2144	12.2588	12.5748	12.6192									-0.585796	-0.541354	-0.225378	-0.180936		1.50087	1.45534	1.16908	1.13362		1.31473	0.190115
ck_96h	21.1362	20.9067	33.4588	34.1844		12.3227	12.5521	13.0482	13.2777		12.8002		12.8002	12.8002	12.8002	12.8002
144h	21.2241	21.2809	32.9531	33.0167		11.729	11.6723	11.7926	11.7358									0.13814	0.0813662	0.201685	0.144911		0.90869	0.945162	0.869534	0.904435		0.906955	0.030927
ck_144h	22.4393	22.5252	34.1311	34.0152		11.6918	11.6059	11.5759	11.49		11.5909		11.5909	11.5909	11.5909	11.5909
Time	Ta2291		TaGRF3-2D			△Ct					Average(△Ct)		Average(△Ct)					△△Ct					2^-△△Ct					Average(2^-△△Ct)	Stdeva
2h	22.9221	22.8714	34.03	33.9476		11.1079	11.1586	11.0255	11.0761									-2.55413	-2.50347	-2.63656	-2.5859		5.87312	5.67048	6.21846	6.0039		5.94149	0.230019
ck_2h	22.0692	22.1579	35.8786	35.6727		13.8094	13.7206	13.6034	13.5147		13.662		13.662	13.662	13.662	13.662		0.147315	0.0585944	-0.0585944	-0.147315		0.902929	0.960199	1.04145	1.10751		1.00302	0.0899002
4h	22.1049	21.8227	34.2659	34.9896		12.161	12.4433	12.8847	13.167									-0.991041	-0.708793	-0.267352	0.0148953		1.98762	1.63444	1.2036	0.989728		1.45384	0.445554
ck_4h	21.9738	22.1538	35.2125	35.2192		13.2387	13.0587	13.2454	13.0654		13.1521		13.1521	13.1521	13.1521	13.1521
8h	20.663	20.8921	34.1096	34.1154		13.4466	13.2175	13.4524	13.2234									-1.34634	-1.57536	-1.34052	-1.56954		2.54266	2.98011	2.53242	2.96811		2.75582	0.252137
ck_8h	21.839	21.8223	36.7814	36.4656		14.9425	14.9591	14.6267	14.6433		14.7929		14.7929	14.7929	14.7929	14.7929
12h	21.3211	21.4653	34.5438	34.6942		13.2227	13.0785	13.3731	13.2288									0.635169	0.490927	0.785481	0.641239		0.643865	0.711568	0.580159	0.641162		0.644188	0.0536937
ck_12h	22.1054	21.9431	34.5581	34.6655		12.4527	12.615	12.5601	12.7225		12.5876		12.5876	12.5876	12.5876	12.5876
24h	21.1356	21.4124	33.9775	34.6837		12.8419	12.5651	13.5481	13.2714									0.609175	0.332437	1.31542	1.03868		0.655571	0.794194	0.40181	0.486774		0.584587	0.17507
ck_24h	22.1967	22.1425	34.278	34.5267		12.0812	12.1354	12.33	12.3841		12.2327		12.2327	12.2327	12.2327	12.2327
96h	21.7095	21.7683	30.4935	30.4996		8.78397	8.72521	8.79009	8.73133									-4.20807	-4.26683	-4.20195	-4.26071		18.4822	19.2506	18.404	19.1691		18.8265	0.445087
ck_96h	22.7274	22.4878	35.8709	35.3284		13.1435	13.3831	12.601	12.8406		12.992		12.992	12.992	12.992	12.992
144h	22.1174	22.1239	34.5214	34.283		12.4041	12.3975	12.1656	12.1591									-1.30093	-1.30744	-1.53937	-1.54588		2.46387	2.47502	2.90667	2.91982		2.69134	0.256323
ck_144h	22.3391	22.5023	36.0009	36.2504		13.6618	13.4987	13.9113	13.7481		13.705		13.705	13.705	13.705	13.705
Time	Ta2291		TaGRF4-4A			△Ct					Average(△Ct)		Average(△Ct)					△△Ct					2^-△△Ct					Average(2^-△△Ct)	Stdeva
2h	22.9221	22.8714	32.7413	32.7548		9.81925	9.86991	9.83273	9.88338									0.333508	0.384165	0.346982	0.397639		0.793604	0.766222	0.786227	0.7591		0.776288	0.0162828
ck_2h	22.0692	22.1579	31.6373	31.5613		9.5681	9.47938	9.49211	9.40339		9.48575		9.48575	9.48575	9.48575	9.48575		0.0823523	-0.00636849	0.00636849	-0.0823523		0.944516	1.00442	0.995595	1.05874		1.00082	0.0467812
4h	22.1049	21.8227	30.9224	30.7113		8.81747	9.09972	8.60642	8.88867									0.683704	0.965952	0.472651	0.754898		0.622565	0.511941	0.720639	0.592588		0.611933	0.0862222
ck_4h	21.9738	22.1538	30.257	30.1381		8.28323	8.10321	8.16432	7.98431		8.13377		8.13377	8.13377	8.13377	8.13377
8h	20.663	20.8921	29.4467	29.376		8.78364	8.55462	8.71296	8.48393									-0.256937	-0.485965	-0.327623	-0.556651		1.19494	1.40052	1.25494	1.47085		1.33031	0.127393
ck_8h	21.839	21.8223	30.7943	30.9481		8.95536	8.97203	9.10913	9.1258		9.04058		9.04058	9.04058	9.04058	9.04058
12h	21.3211	21.4653	30.2264	30.2556		8.90533	8.76109	8.9345	8.79026									-0.318781	-0.463023	-0.289615	-0.433856		1.24728	1.37843	1.22231	1.35084		1.29971	0.0764854
ck_12h	22.1054	21.9431	31.3133	31.1834		9.20786	9.3702	9.07803	9.24037		9.22411		9.22411	9.22411	9.22411	9.22411
24h	21.1356	21.4124	30.6787	30.4644		9.5431	9.26636	9.32874	9.052									0.594642	0.317904	0.380283	0.103544		0.662209	0.802235	0.768287	0.930744		0.790869	0.110691
ck_24h	22.1967	22.1425	31.1141	31.1221		8.91736	8.97154	8.92537	8.97955		8.94846		8.94846	8.94846	8.94846	8.94846
96h	21.7095	21.7683	34.9277	34.728		13.2182	13.1594	13.0185	12.9597									4.44895	4.39018	4.24929	4.19052		0.0457861	0.0476896	0.0525819	0.054768		0.0502064	0.00417631
ck_96h	22.7274	22.4878	31.4003	31.3534		8.67288	8.9125	8.62595	8.86557		8.76922		8.76922	8.76922	8.76922	8.76922
144h	22.1174	22.1239	31.3439	31.3142		9.22653	9.22002	9.19682	9.19031									-1.52857	-1.53509	-1.55828	-1.5648		2.885	2.89806	2.94503	2.95836		2.92161	0.0355611
ck_144h	22.3391	22.5023	33.1228	33.2288		10.7837	10.6205	10.8897	10.7265		10.7551		10.7551	10.7551	10.7551	10.7551
Time	Ta2291		TaGRF4-4D			△Ct					Average(△Ct)		Average(△Ct)					△△Ct					2^-△△Ct					Average(2^-△△Ct)	Stdeva
2h	23.063	23.1062	29.1135	29.1133		6.0505	6.00732	6.0503	6.00712									-0.150609	-0.193791	-0.150814	-0.193997		1.11004	1.14377	1.1102	1.14393		1.12698	0.0194743
ck_2h	22.1044	22.2071	28.3211	28.3925		6.21675	6.11406	6.28817	6.18547		6.20111		6.20111	6.20111	6.20111	6.20111		0.0156408	-0.0870568	0.0870568	-0.0156408		0.989217	1.0622	0.941441	1.0109		1.00094	0.0500986
4h	22.5322	22.0624	27.996	27.9445		5.46381	5.93361	5.41224	5.88204									0.675744	1.14554	0.624173	1.09397		0.626009	0.45202	0.648792	0.46847		0.548823	0.102922
ck_4h	22.2585	22.3641	27.091	27.1078		4.83245	4.72684	4.84929	4.74369		4.78807		4.78807	4.78807	4.78807	4.78807
8h	21.0151	20.9674	26.0861	25.8707		5.07098	5.11865	4.85562	4.90329									-0.376425	-0.32875	-0.591786	-0.544112		1.29812	1.25592	1.50711	1.45812		1.37982	0.121599
ck_8h	22.4189	22.2689	27.8111	27.7715		5.39219	5.54223	5.35257	5.50261		5.4474		5.4474	5.4474	5.4474	5.4474
12h	22.0289	21.6661	27.584	27.4924		5.55503	5.91788	5.46346	5.82631									0.0420477	0.4049	-0.0495234	0.313329		0.971275	0.755289	1.03492	0.804783		0.891567	0.132926
ck_12h	22.6621	22.2195	27.9038	28.0038		5.24166	5.68432	5.34165	5.78431		5.51298		5.51298	5.51298	5.51298	5.51298
24h	21.3688	21.4526	26.7642	26.868		5.39546	5.31161	5.49924	5.41539									0.0230732	-0.0607738	0.126848	0.0430008		0.984134	1.04303	0.91583	0.970634		0.978406	0.052232
ck_24h	22.2378	22.2205	27.5938	27.6093		5.35595	5.37326	5.37152	5.38883		5.37239		5.37239	5.37239	5.37239	5.37239
96h	22.0814	22.043	31.0324	31.1917		8.95095	8.98932	9.11027	9.14864									3.32791	3.36628	3.48724	3.52561		0.099586	0.0969724	0.0891737	0.0868334		0.0931414	0.0061031
ck_96h	22.4688	22.3661	28.0013	28.0797		5.53251	5.63515	5.61092	5.71356		5.62303		5.62303	5.62303	5.62303	5.62303
144h	22.2919	22.303	27.9916	28.0605		5.69967	5.6886	5.76862	5.75755									-0.470988	-0.48206	-0.402035	-0.413107		1.38606	1.39674	1.32137	1.33155		1.35893	0.0379721
ck_144h	22.932	23.1413	29.1689	29.2457		6.23691	6.0276	6.31372	6.10441		6.17066		6.17066	6.17066	6.17066	6.17066
Time	Ta2291		TaGRF5-4A			△Ct					Average(△Ct)		Average(△Ct)					△△Ct					2^-△△Ct					Average(2^-△△Ct)	Stdeva
2h	22.9221	22.8714	31.8973	31.8042		8.97527	9.02592	8.88216	8.93281									0.424683	0.47534	0.331575	0.382231		0.745002	0.719297	0.794668	0.76725		0.756554	0.0320864
ck_2h	22.0692	22.1579	30.587	30.7413		8.51783	8.4291	8.67206	8.58334		8.55058		8.55058	8.55058	8.55058	8.55058		-0.0327581	-0.121479	0.121479	0.0327581		1.02297	1.08785	0.919245	0.97755		1.0019	0.0713113
4h	22.1049	21.8227	30.9362	30.8423		8.83132	9.11357	8.73736	9.01961									0.133322	0.415569	0.0393617	0.321609		0.91173	0.749724	0.973085	0.800177		0.858679	0.101975
ck_4h	21.9738	22.1538	30.7737	30.7499		8.79993	8.61992	8.77609	8.59607		8.698		8.698	8.698	8.698	8.698
8h	20.663	20.8921	29.1126	29.0387		8.44955	8.22052	8.37571	8.14668									-0.258332	-0.48736	-0.332171	-0.561199		1.19609	1.40188	1.25891	1.47549		1.33309	0.128169
ck_8h	21.839	21.8223	30.5088	30.5682		8.66987	8.68654	8.72923	8.7459		8.70788		8.70788	8.70788	8.70788	8.70788
12h	21.3211	21.4653	30.0488	29.9386		8.72772	8.58348	8.61748	8.47324									0.0194106	-0.124831	-0.0908355	-0.235077		0.986636	1.09038	1.06499	1.17697		1.07974	0.0784281
ck_12h	22.1054	21.9431	30.6745	30.7906		8.56909	8.73144	8.68519	8.84753		8.70831		8.70831	8.70831	8.70831	8.70831
24h	21.1356	21.4124	29.2173	29.2373		8.08166	7.80493	8.10168	7.82494									-1.09366	-1.37039	-1.07364	-1.35037		2.13414	2.58541	2.10473	2.54978		2.34352	0.259432
ck_24h	22.1967	22.1425	31.336	31.3539		9.13932	9.1935	9.15714	9.21132		9.17532		9.17532	9.17532	9.17532	9.17532
96h	21.7095	21.7683	32.3673	32.9256		10.6578	10.5991	11.2161	11.1574									1.86263	1.80386	2.42095	2.36218		0.274975	0.286407	0.186734	0.194497		0.235653	0.0523102
ck_96h	22.7274	22.4878	31.5417	31.264		8.81422	9.05385	8.53654	8.77617		8.7952		8.7952	8.7952	8.7952	8.7952
144h	22.1174	22.1239	30.3363	30.3038		8.21891	8.21239	8.18637	8.17986									-1.42909	-1.4356	-1.46162	-1.46814		2.69276	2.70495	2.75418	2.76664		2.72963	0.0362466
ck_144h	22.3391	22.5023	32.0155	32.1219		9.67641	9.51323	9.78276	9.61958		9.64799		9.64799	9.64799	9.64799	9.64799
Time	Ta2291		TaGRF6-4A			△Ct					Average(△Ct)		Average(△Ct)					△△Ct					2^-△△Ct					Average(2^-△△Ct)	Stdeva
2h	23.063	23.1062	34.668	34.7581		11.605	11.5619	11.6952	11.652									-1.82258	-1.86577	-1.73248	-1.77566		3.53714	3.64462	3.32298	3.42395		3.48217	0.139214
ck_2h	22.1044	22.2071	35.5644	35.6023		13.4601	13.3574	13.4979	13.3952		13.4276		13.4276	13.4276	13.4276	13.4276		0.0324304	-0.0702672	0.0702672	-0.0324304		0.977772	1.04991	0.952462	1.02273		1.00072	0.0438173
4h	22.5322	22.0624	34.4358	34.339		11.9036	12.3734	11.8068	12.2766									0.869904	1.3397	0.773109	1.24291		0.547183	0.395102	0.585155	0.422521		0.48749	0.0928409
ck_4h	22.2585	22.3641	33.1825	33.5075		10.924	10.8184	11.249	11.1434		11.0337		11.0337	11.0337	11.0337	11.0337
8h	21.0151	20.9674	32.9259	32.9855		11.9108	11.9585	11.9704	12.0181									0.709372	0.757046	0.768976	0.816651		0.611586	0.591707	0.586834	0.567758		0.589471	0.0180045
ck_8h	22.4189	22.2689	33.6579	33.4327		11.239	11.389	11.0138	11.1638		11.2014		11.2014	11.2014	11.2014	11.2014
12h	22.0289	21.6661	32.6722	33.2603		10.6432	11.0061	11.2313	11.5942									-1.15457	-0.791713	-0.566444	-0.203591		2.22617	1.73113	1.48087	1.15156		1.64743	0.452981
ck_12h	22.6621	22.2195	34.113	34.3642		11.4509	11.8935	11.702	12.1447		11.7978		11.7978	11.7978	11.7978	11.7978
24h	21.3688	21.4526	33.1788	33.1956		11.81	11.7262	11.8268	11.7429									-0.00885921	-0.0927062	0.00792663	-0.0759203		1.00616	1.06637	0.994521	1.05403		1.03027	0.0352473
ck_24h	22.2378	22.2205	33.8775	34.2185		11.6397	11.657	11.9807	11.998		11.8189		11.8189	11.8189	11.8189	11.8189
96h	22.0814	22.043	33.1109	33.0961		11.0295	11.0679	11.0147	11.0531									0.195111	0.23348	0.180318	0.218687		0.873506	0.850581	0.882509	0.859347		0.866485	0.0142588
ck_96h	22.4688	22.3661	33.0763	33.4274		10.6075	10.7102	10.9586	11.0613		10.8344		10.8344	10.8344	10.8344	10.8344
144h	22.2919	22.303	33.5975	34.1628		11.3056	11.2945	11.8709	11.8598									-0.618725	-0.629797	-0.0533956	-0.0644672		1.53552	1.54735	1.0377	1.0457		1.29157	0.288579
ck_144h	22.932	23.1413	35.0645	34.8575		12.1325	11.9231	11.9255	11.7162		11.9243		11.9243	11.9243	11.9243	11.9243
Time	Ta2291		TaGRF9-6D			△Ct					Average(△Ct)		Average(△Ct)					△△Ct					2^-△△Ct					Average(2^-△△Ct)	Stdeva
2h	22.7994	22.8233	32.1426	32.2177		9.34318	9.31932	9.41833	9.39447									-1.60857	-1.63242	-1.53341	-1.55727		3.04949	3.10033	2.8947	2.94296		2.99687	0.0945454
ck_2h	21.4267	21.4254	32.2962	32.4594		10.8695	10.8708	11.0327	11.034		10.9517		10.9517	10.9517	10.9517	10.9517		-0.0822142	-0.0809485	0.0809485	0.0822142		1.05864	1.05771	0.945436	0.944607		1.0016	0.0653326
4h	21.3842	21.4339	32.5821	32.51		11.1979	11.1483	11.1257	11.0761									1.12106	1.07143	1.04887	0.999244		0.459757	0.475847	0.483346	0.500262		0.479803	0.0168189
ck_4h	22.1747	22.6238	32.5156	32.4366		10.3409	9.89179	10.2619	9.81281		10.0768		10.0768	10.0768	10.0768	10.0768
8h	20.649	20.2716	31.1601	30.9803		10.5111	10.8885	10.3314	10.7087									-0.358291	0.0190832	-0.538039	-0.160665		1.28191	0.98686	1.452	1.1178		1.20964	0.20168
ck_8h	21.001	21.6037	32.1356	32.2079		11.1346	10.5319	11.2069	10.6042		10.8694		10.8694	10.8694	10.8694	10.8694
12h	22.285	22.1973	31.3954	31.4161		9.11035	9.19802	9.13111	9.21877									-2.54526	-2.45759	-2.5245	-2.43683		5.83712	5.49298	5.75373	5.41451		5.62459	0.202731
ck_12h	20.3448	20.7156	32.1788	32.1928		11.834	11.4632	11.848	11.4772		11.6556		11.6556	11.6556	11.6556	11.6556
24h	20.0039	20.5509	30.3378	30.8578		10.3338	9.7869	10.8539	10.3069									0.81498	0.268031	1.33502	0.788068		0.568417	0.830452	0.396388	0.579119		0.593594	0.178732
ck_24h	22.0075	22.2599	31.5718	31.7333		9.56435	9.31193	9.7258	9.47338		9.51887		9.51887	9.51887	9.51887	9.51887
96h	21.3389	21.6688	30.341	30.3629		9.00211	8.67229	9.02399	8.69416									0.525594	0.195768	0.547467	0.217641		0.694673	0.873108	0.68422	0.85997		0.777993	0.102474
ck_96h	23.4277	22.9808	31.5731	31.7885		8.14544	8.59227	8.36077	8.8076		8.47652		8.47652	8.47652	8.47652	8.47652
144h	21.3166	21.3659	32.2078	32.3913		10.8912	10.8419	11.0747	11.0254									1.27158	1.22232	1.45511	1.40586		0.414207	0.428592	0.364728	0.377394		0.39623	0.0300976
ck_144h	23.1333	22.5474	32.0927	32.8272		8.95938	9.5453	9.69388	10.2798		9.61959		9.61959	9.61959	9.61959	9.61959
Time	Ta2291		TaGRF10-6A			△Ct					Average(△Ct)		Average(△Ct)					△△Ct					2^-△△Ct					Average(2^-△△Ct)	Stdeva
2h	23.063	23.1062	31.2869	31.1957		8.22396	8.18078	8.13277	8.08959									-0.472138	-0.515321	-0.563331	-0.606513		1.38716	1.42931	1.47768	1.52258		1.45418	0.0587071
ck_2h	22.1044	22.2071	30.8297	30.874		8.7253	8.6226	8.7696	8.6669		8.6961		8.6961	8.6961	8.6961	8.6961		0.0291995	-0.0734981	0.0734981	-0.0291995		0.979964	1.05226	0.950331	1.02045		1.00075	0.0447804
4h	22.5322	22.0624	30.5177	30.127		7.98549	8.45529	7.59472	8.06452									1.07149	1.54129	0.680722	1.15052		0.475828	0.343579	0.623853	0.450463		0.473431	0.115501
ck_4h	22.2585	22.3641	29.2045	29.2461		6.94602	6.84042	6.98759	6.88198		6.914		6.914	6.914	6.914	6.914
8h	21.0151	20.9674	28.3937	28.3907		7.37858	7.42625	7.3756	7.42328									-0.336144	-0.28847	-0.339119	-0.291445		1.26238	1.22134	1.26498	1.22387		1.24314	0.0237617
ck_8h	22.4189	22.2689	30.1439	29.9733		7.72499	7.87503	7.55441	7.70445		7.71472		7.71472	7.71472	7.71472	7.71472
12h	22.0289	21.6661	30.108	29.9786		8.07902	8.44188	7.94965	8.3125									0.202374	0.565226	0.0730023	0.435855		0.869119	0.675849	0.950658	0.739256		0.80872	0.124196
ck_12h	22.6621	22.2195	30.2715	30.3634		7.60934	8.05201	7.70129	8.14395		7.87665		7.87665	7.87665	7.87665	7.87665
24h	21.3688	21.4526	29.5046	29.4479		8.13583	8.05198	8.07913	7.99529									-0.0500209	-0.133868	-0.106716	-0.190563		1.03528	1.09723	1.07677	1.14121		1.08762	0.0440501
ck_24h	22.2378	22.2205	30.4969	30.3331		8.25908	8.27639	8.09531	8.11262		8.18585		8.18585	8.18585	8.18585	8.18585
96h	22.0814	22.043	34.0189	34.3456		11.9375	11.9758	12.2642	12.3026									3.34053	3.3789	3.66728	3.70565		0.0987186	0.0961277	0.0787116	0.0766458		0.087551	0.0114794
ck_96h	22.4688	22.3661	31.0289	30.9998		8.56015	8.66279	8.53105	8.63369		8.59692		8.59692	8.59692	8.59692	8.59692
144h	22.2919	22.303	31.5663	31.8108		9.27442	9.26334	9.51884	9.50777									0.457081	0.446009	0.701504	0.690432		0.728459	0.734071	0.614931	0.619668		0.674282	0.0658662
ck_144h	22.932	23.1413	31.864	31.844		8.93199	8.72268	8.91199	8.70268		8.81734		8.81734	8.81734	8.81734	8.81734
Time	Ta2291		TaGRF10-6B			△Ct					Average(△Ct)		Average(△Ct)					△△Ct					2^-△△Ct					Average(2^-△△Ct)	Stdeva
2h	22.7994	22.8233	31.1613	31.2966		8.3619	8.33805	8.49719	8.47333									-0.592679	-0.616534	-0.457395	-0.481249		1.50804	1.53319	1.37306	1.39595		1.45256	0.0797998
ck_2h	21.4267	21.4254	30.4046	30.3568		8.97785	8.97912	8.93005	8.93132		8.95458		8.95458	8.95458	8.95458	8.95458		0.0232679	0.0245336	-0.0245336	-0.0232679		0.984001	0.983138	1.01715	1.01626		1.00014	0.0191372
4h	21.3842	21.4339	29.2962	29.4688		7.91192	7.8623	8.08454	8.03491									2.20805	2.15842	2.38067	2.33104		0.216427	0.224001	0.192021	0.198741		0.207797	0.0149214
ck_4h	22.1747	22.6238	28.1178	28.0885		5.94302	5.49394	5.91381	5.46473		5.70387		5.70387	5.70387	5.70387	5.70387
8h	20.649	20.2716	27.7545	27.7303		7.10558	7.48295	7.08133	7.4587									-1.6106	-1.23323	-1.63485	-1.25748		3.0538	2.35093	3.10555	2.39077		2.72526	0.410108
ck_8h	21.001	21.6037	30.0481	29.989		9.04715	8.44439	8.98797	8.38521		8.71618		8.71618	8.71618	8.71618	8.71618
12h	22.285	22.1973	29.3089	29.2719		7.02391	7.11157	6.98684	7.0745									-2.6842	-2.59653	-2.72127	-2.6336		6.42723	6.0483	6.59451	6.20572		6.31894	0.240645
ck_12h	20.3448	20.7156	30.2427	30.2339		9.89795	9.52708	9.88913	9.51826		9.7081		9.7081	9.7081	9.7081	9.7081
24h	20.0039	20.5509	28.7653	28.8159		8.76135	8.2144	8.81199	8.26504									0.300609	-0.24634	0.351248	-0.195701		0.811909	1.18619	0.783906	1.14528		0.981822	0.213329
ck_24h	22.0075	22.2599	30.6391	30.5497		8.63168	8.37926	8.54223	8.2898		8.46074		8.46074	8.46074	8.46074	8.46074
96h	21.3389	21.6688	36.2535	36.0377		14.9145	14.5847	14.6988	14.3689									8.06651	7.73669	7.85074	7.52092		0.00373024	0.0046884	0.00433203	0.00544476		0.00454886	0.000716298
ck_96h	23.4277	22.9808	30.0349	30.0697		6.60717	7.054	6.64204	7.08888		6.84802		6.84802	6.84802	6.84802	6.84802
144h	21.3166	21.3659	29.1836	29.5865		7.867	7.81775	8.26993	8.22067									-1.16469	-1.21394	-0.761766	-0.811019		2.24185	2.31971	1.69556	1.75445		2.00289	0.32334
ck_144h	23.1333	22.5474	31.9034	31.8407		8.77005	9.35597	8.70741	9.29334		9.03169		9.03169	9.03169	9.03169	9.03169
Time	Ta2291		TaGRF10-6D			△Ct					Average(△Ct)		Average(△Ct)					△△Ct					2^-△△Ct					Average(2^-△△Ct)	Stdeva
2h	22.7994	22.8233	30.0774	30.0632		7.27801	7.25415	7.26381	7.23996									-0.31232	-0.336174	-0.326518	-0.350372		1.2417	1.2624	1.25398	1.27489		1.25824	0.0139779
ck_2h	21.4267	21.4254	29.0777	28.9552		7.65094	7.65221	7.52845	7.52971		7.59033		7.59033	7.59033	7.59033	7.59033		0.0606128	0.0618785	-0.0618785	-0.0606128		0.958857	0.958016	1.04382	1.04291		1.0009	0.049037
4h	21.3842	21.4339	28.4891	28.139		7.10489	7.05527	6.75475	6.70513									1.45222	1.40259	1.10208	1.05245		0.365459	0.378249	0.465845	0.482149		0.422925	0.059576
ck_4h	22.1747	22.6238	27.9928	28.1111		5.81802	5.36895	5.9364	5.48732		5.65267		5.65267	5.65267	5.65267	5.65267
8h	20.649	20.2716	26.3836	26.3071		5.73464	6.11202	5.65811	6.03548									-1.37017	-0.992794	-1.4467	-1.06933		2.58501	1.99003	2.72584	2.09845		2.34983	0.360247
ck_8h	21.001	21.6037	28.4069	28.4075		7.40588	6.80313	7.40649	6.80374		7.10481		7.10481	7.10481	7.10481	7.10481
12h	22.285	22.1973	28.0659	28.0498		5.78084	5.86851	5.76476	5.85243									-1.97077	-1.88311	-1.98685	-1.89918		3.91978	3.68868	3.9637	3.73002		3.82555	0.136412
ck_12h	20.3448	20.7156	28.2577	28.306		7.9129	7.54202	7.9612	7.59033		7.75161		7.75161	7.75161	7.75161	7.75161
24h	20.0039	20.5509	27.5615	27.6147		7.55762	7.01067	7.61078	7.06383									1.06331	0.516365	1.11648	0.569527		0.478532	0.699131	0.461219	0.673838		0.57818	0.125684
ck_24h	22.0075	22.2599	28.7326	28.5234		6.72513	6.47271	6.5159	6.26348		6.49431		6.49431	6.49431	6.49431	6.49431
96h	21.3389	21.6688	33.9336	33.7421		12.5946	12.2648	12.4031	12.0733									6.19524	5.86541	6.00375	5.67392		0.0136473	0.0171528	0.0155845	0.0195875		0.016493	0.00251228
ck_96h	23.4277	22.9808	29.5072	29.7001		6.07953	6.52637	6.27243	6.71926		6.3994		6.3994	6.3994	6.3994	6.3994
144h	21.3166	21.3659	28.2654	28.2663		6.94876	6.89951	6.94964	6.90039									-1.45531	-1.50456	-1.45443	-1.50368		2.74216	2.83739	2.74048	2.83566		2.78892	0.0549739
ck_144h	23.1333	22.5474	31.0845	31.4043		7.95123	8.53715	8.271	8.85692		8.40407		8.40407	8.40407	8.40407	8.40407
Time	Ta2291		TaGRF11-7A			△Ct					Average(△Ct)		Average(△Ct)					△△Ct					2^-△△Ct					Average(2^-△△Ct)	Stdeva
2h	22.9755	22.8808	30.0343	30.1821		7.0588	7.15355	7.20656	7.30132									-0.75315	-0.658394	-0.605382	-0.510626		1.68547	1.57833	1.52138	1.42467		1.55246	0.109021
ck_2h	21.4347	21.3725	29.3244	29.1066		7.8897	7.95195	7.67194	7.73419		7.81195		7.81195	7.81195	7.81195	7.81195		0.077756	0.140001	-0.140001	-0.077756		0.94753	0.907518	1.10191	1.05538		1.00308	0.090773
4h	22.3464	22.0892	29.1066	29.2334		6.76024	7.01739	6.88706	7.14421									0.224769	0.481915	0.351589	0.608735		0.855732	0.716026	0.783721	0.655771		0.752813	0.0862516
ck_4h	21.7095	21.7174	28.1684	28.3295		6.45891	6.45095	6.62	6.61204		6.53547		6.53547	6.53547	6.53547	6.53547
8h	20.7322	20.9307	27.2164	27.265		6.48424	6.28568	6.53286	6.3343									-0.488284	-0.686842	-0.439666	-0.638224		1.40278	1.60976	1.35629	1.55641		1.48131	0.121018
ck_8h	21.7178	21.7941	28.807	28.6499		7.08924	7.01291	6.93214	6.85581		6.97253		6.97253	6.97253	6.97253	6.97253
12h	21.6934	21.6484	28.0846	27.9508		6.39114	6.43623	6.25737	6.30246									-0.390999	-0.345912	-0.524768	-0.479681		1.3113	1.27095	1.4387	1.39444		1.35385	0.07644
ck_12h	21.4365	21.9246	28.5058	28.4195		7.06936	6.58124	6.98304	6.49492		6.78214		6.78214	6.78214	6.78214	6.78214
24h	21.7259	21.4404	27.9241	27.9328		6.19818	6.48367	6.20684	6.49233									-0.302491	-0.0169941	-0.293832	-0.00833515		1.23327	1.01185	1.22589	1.00579		1.1192	0.127515
ck_24h	22.2839	22.2008	28.823	28.663		6.53911	6.6222	6.37913	6.46223		6.50067		6.50067	6.50067	6.50067	6.50067
96h	22.0528	22.0488	29.2542	29.3282		7.20141	7.20544	7.27541	7.27944									0.846566	0.850599	0.92057	0.924603		0.556107	0.554554	0.5283	0.526826		0.541447	0.0160555
ck_96h	22.1929	22.3358	28.581	28.6574		6.38809	6.24517	6.46451	6.32159		6.35484		6.35484	6.35484	6.35484	6.35484
144h	21.5386	21.5312	28.2557	28.1283		6.71707	6.72454	6.58969	6.59717									-0.0404285	-0.0329529	-0.167801	-0.160325		1.02842	1.0231	1.12334	1.11754		1.0731	0.054758
ck_144h	23.1125	23.1637	29.7669	30.0243		6.6544	6.60313	6.91186	6.86059		6.75749		6.75749	6.75749	6.75749	6.75749
Time	Ta2291		TaGRF11-7D			△Ct					Average(△Ct)		Average(△Ct)					△△Ct					2^-△△Ct					Average(2^-△△Ct)	Stdeva
2h	22.9755	22.8808	31.0476	31.1175		8.07206	8.16681	8.14194	8.23669									-0.941632	-0.846876	-0.871751	-0.776996		1.9207	1.7986	1.82988	1.71356		1.81569	0.0855397
ck_2h	21.4347	21.3725	30.2546	30.58		8.81988	8.88213	9.14525	9.2075		9.01369		9.01369	9.01369	9.01369	9.01369		-0.193807	-0.131562	0.131562	0.193807		1.14378	1.09548	0.912843	0.874295		1.0066	0.132931
4h	22.3464	22.0892	30.1951	30.2306		7.8487	8.10585	7.88426	8.14141									0.124567	0.381714	0.160128	0.417275		0.917279	0.767525	0.894945	0.748838		0.832147	0.0862314
ck_4h	21.7095	21.7174	29.3752	29.5		7.66575	7.65778	7.79048	7.78252		7.72413		7.72413	7.72413	7.72413	7.72413
8h	20.7322	20.9307	28.4659	28.4078		7.73376	7.5352	7.67567	7.47711									-0.419267	-0.617825	-0.477353	-0.675911		1.33725	1.53456	1.39219	1.59761		1.4654	0.121167
ck_8h	21.7178	21.7941	29.8437	29.9742		8.12594	8.04961	8.25644	8.18011		8.15302		8.15302	8.15302	8.15302	8.15302
12h	21.6934	21.6484	29.2328	29.2083		7.53936	7.58445	7.51482	7.5599									-0.366428	-0.321341	-0.390976	-0.345888		1.28916	1.24949	1.31128	1.27093		1.28022	0.0262999
ck_12h	21.4365	21.9246	29.512	29.6606		8.07557	7.58746	8.22413	7.73602		7.90579		7.90579	7.90579	7.90579	7.90579
24h	21.7259	21.4404	29.2933	29.1988		7.56739	7.85289	7.4729	7.7584									-0.294056	-0.00855968	-0.388548	-0.103051		1.22608	1.00595	1.30907	1.07404		1.15379	0.138511
ck_24h	22.2839	22.2008	30.1408	30.0667		7.85695	7.94005	7.78286	7.86595		7.86145		7.86145	7.86145	7.86145	7.86145
96h	22.0528	22.0488	30.0219	30.1057		7.96908	7.97311	8.05285	8.05688									0.753948	0.75798	0.837722	0.841755		0.592979	0.591324	0.559526	0.557965		0.575448	0.0193092
ck_96h	22.1929	22.3358	29.354	29.6049		7.16111	7.01819	7.41206	7.26914		7.21513		7.21513	7.21513	7.21513	7.21513
144h	21.5386	21.5312	29.1257	29.0107		7.58711	7.59458	7.47205	7.47952									0.314454	0.32193	0.199392	0.206867		0.804155	0.799999	0.870918	0.866417		0.835372	0.038527
ck_144h	23.1125	23.1637	30.4316	30.3899		7.31918	7.26791	7.2774	7.22613		7.27265		7.27265	7.27265	7.27265	7.27265

## Sheet: Mannitol Root
Mannitol Root
Time	Ta2291		TaGRF1-2B			△Ct					Average(△Ct)		Average(△Ct)					△△Ct					2^-△△Ct					Average(2^-△△Ct)	Stdeva
2h	19.7664	19.6084	26.7647	27.0199		6.99829	7.15622	7.2535	7.41142									-0.171486	-0.0135608	0.0837159	0.241641		1.12622	1.00944	0.943624	0.845783		0.981267	0.117725
ck_2h	19.5833	19.6946	26.7794	26.838		7.19612	7.08485	7.25471	7.14344		7.16978		7.16978	7.16978	7.16978	7.16978		0.0263427	-0.0849261	0.0849261	-0.0263427		0.981906	1.06063	0.942833	1.01843		1.00095	0.0503581
4h	19.6071	20.3693	26.4533	26.3964		6.84621	6.08397	6.78934	6.02709									2.59151	1.82927	2.53464	1.7724		0.165911	0.281407	0.172583	0.292722		0.228156	0.0682329
ck_4h	21.3359	21.358	25.5693	25.634		4.2334	4.21133	4.29807	4.276		4.2547		4.2547	4.2547	4.2547	4.2547
8h	21.9827	22.0021	27.1519	27.2105		5.16919	5.14977	5.22778	5.20836									-1.27087	-1.29029	-1.21228	-1.2317		2.41307	2.44578	2.31704	2.34844		2.38108	0.0588106
ck_8h	20.3963	21.1609	27.1232	27.3142		6.72683	5.96224	6.91789	6.1533		6.44006		6.44006	6.44006	6.44006	6.44006
12h	22.4518	22.3508	28.0369	27.5901		5.58506	5.68608	5.1383	5.23932									1.25165	1.35267	0.804898	0.905918		0.419967	0.391566	0.572403	0.533693		0.479407	0.0872624
ck_12h	21.6609	22.2834	26.3607	26.2503		4.69986	4.07739	4.58942	3.96695		4.33341		4.33341	4.33341	4.33341	4.33341
24h	26.0415	26.0801	28.5261	28.5341		2.48458	2.44597	2.49261	2.454									-4.70405	-4.74267	-4.69603	-4.73464		26.0652	26.7723	25.9206	26.6237		26.3454	0.415805
ck_24h	19.6671	21.0943	27.5722	27.5664		7.90508	6.47792	7.89935	6.47219		7.18864		7.18864	7.18864	7.18864	7.18864
96h	24.7078	24.8039	29.9074	29.9724		5.19963	5.10348	5.26467	5.16852									-2.12413	-2.22028	-2.05909	-2.15524		4.35941	4.65984	4.16724	4.45443		4.41023	0.204846
ck_96h	20.6205	20.3949	27.1712	28.4918		6.55067	6.77623	7.8713	8.09686		7.32376		7.32376	7.32376	7.32376	7.32376
144h	23.6615	23.5751	32.561	32.989		8.89943	8.98589	9.32747	9.41393									1.81964	1.9061	2.24768	2.33414		0.283291	0.266813	0.210563	0.198315		0.239745	0.0416215
ck_144h	20.9645	21.1074	28.0797	28.1518		7.1152	6.97236	7.18722	7.04438		7.07979		7.07979	7.07979	7.07979	7.07979
Time	Ta2291		TaGRF1-2D			△Ct					Average(△Ct)		Average(△Ct)					△△Ct					2^-△△Ct					Average(2^-△△Ct)	Stdeva
2h	19.7664	19.6084	24.9964	25.1865		5.23001	5.38793	5.42018	5.57811									0.101293	0.259218	0.291465	0.44939		0.932197	0.835541	0.817072	0.732352		0.82929	0.0820062
ck_2h	19.5833	19.6946	24.4808	25.0545		4.8975	4.78623	5.4712	5.35994		5.12872		5.12872	5.12872	5.12872	5.12872		-0.23122	-0.342489	0.342489	0.23122		1.17383	1.26794	0.78868	0.851914		1.02059	0.235866
4h	19.6071	20.3693	25.0995	25.146		5.49243	4.73018	5.53887	4.77662									2.1561	1.39386	2.20254	1.4403		0.224362	0.380546	0.217255	0.368492		0.297663	0.0889284
ck_4h	21.3359	21.358	24.6968	24.6697		3.36094	3.33887	3.33378	3.31171		3.33633		3.33633	3.33633	3.33633	3.33633
8h	21.9827	22.0021	26.5791	25.7538		4.59637	4.57695	3.77109	3.75166									-0.261342	-0.280764	-1.08663	-1.10605		1.19859	1.21484	2.12377	2.15256		1.67244	0.537942
ck_8h	20.3963	21.1609	25.6005	25.6722		5.20415	4.43956	5.27587	4.51128		4.85772		4.85772	4.85772	4.85772	4.85772
12h	22.4518	22.3508	27.6114	27.5381		5.15955	5.26057	5.0863	5.18732									3.53605	3.63707	3.4628	3.56382		0.0862071	0.0803772	0.0906971	0.0845636		0.0854613	0.00426708
ck_12h	21.6609	22.2834	23.6057	23.5856		1.9448	1.32233	1.92468	1.30221		1.62351		1.62351	1.62351	1.62351	1.62351
24h	26.0415	26.0801	29.198	29.3413		3.1565	3.11789	3.29982	3.26121									-1.31366	-1.35227	-1.17034	-1.20895		2.48571	2.55314	2.25064	2.3117		2.4003	0.142479
ck_24h	19.6671	21.0943	24.6161	25.0855		4.94905	3.52189	5.41843	3.99127		4.47016		4.47016	4.47016	4.47016	4.47016
96h	24.7078	24.8039	28.3424	28.3353		3.63463	3.53848	3.62752	3.53137									-1.95994	-2.05608	-1.96705	-2.06319		3.89045	4.15856	3.90967	4.1791		4.03444	0.155603
ck_96h	20.6205	20.3949	26.0432	26.1613		5.42274	5.6483	5.54082	5.76638		5.59456		5.59456	5.59456	5.59456	5.59456
144h	23.6615	23.5751	29.6485	29.4968		5.98697	6.07343	5.8353	5.92176									1.17784	1.2643	1.02617	1.11262		0.442013	0.416303	0.491013	0.462453		0.452945	0.031632
ck_144h	20.9645	21.1074	25.8481	25.8421		4.88357	4.74073	4.87753	4.73469		4.80913		4.80913	4.80913	4.80913	4.80913
Time	Ta2291		TaGRF3-2B			△Ct					Average(△Ct)		Average(△Ct)					△△Ct					2^-△△Ct					Average(2^-△△Ct)	Stdeva
2h	19.7664	19.6084	35.491	35.7424		15.7247	15.8826	15.976	16.134									1.37556	1.53349	1.62695	1.78488		0.385402	0.345441	0.323772	0.290201		0.336204	0.0399024
ck_2h	19.5833	19.6946	34.2199	33.7561		14.6366	14.5253	14.1728	14.0616		14.3491		14.3491	14.3491	14.3491	14.3491		0.287511	0.176242	-0.176242	-0.287511		0.819314	0.885005	1.12994	1.22053		1.0137	0.192041
4h	19.6071	20.3693	34.0549	34.3891		14.4478	13.6855	14.782	14.0197									0.538946	-0.223296	0.873142	0.1109		0.688273	1.1674	0.545956	0.926011		0.83191	0.273135
ck_4h	21.3359	21.358	35.3443	35.1672		14.0084	13.9863	13.8313	13.8092		13.9088		13.9088	13.9088	13.9088	13.9088
8h	21.9827	22.0021	34.9115	34.9572		12.9288	12.9094	12.9745	12.9551									-1.29508	-1.3145	-1.2494	-1.26882		2.45391	2.48717	2.37742	2.40964		2.43203	0.0483115
ck_8h	20.3963	21.1609	34.6994	35.3057		14.303	13.5385	14.9093	14.1448		14.2239		14.2239	14.2239	14.2239	14.2239
12h	22.4518	22.3508	36.1057	36.0675		13.6539	13.7549	13.6157	13.7167									1.58497	1.68599	1.54678	1.6478		0.333332	0.31079	0.342273	0.319126		0.32638	0.0141018
ck_12h	21.6609	22.2834	34.2388	33.8433		12.5779	11.9554	12.1824	11.56		12.0689		12.0689	12.0689	12.0689	12.0689
24h	26.0415	26.0801	40.0867	40.5162		14.0452	14.0065	14.4747	14.436									0.234938	0.196322	0.664443	0.625828		0.849722	0.872773	0.630932	0.648048		0.750369	0.128567
ck_24h	19.6671	21.0943	34.1551	34.2267		14.488	13.0608	14.5596	13.1324		13.8102		13.8102	13.8102	13.8102	13.8102
96h	24.7078	24.8039	36.179	36.1854		11.4712	11.375	11.4776	11.3815									-3.01607	-3.11221	-3.00963	-3.10577		8.08958	8.64709	8.05355	8.60857		8.3497	0.321878
ck_96h	20.6205	20.3949	35.1887	34.8012		14.5683	14.7938	14.1807	14.4063		14.4873		14.4873	14.4873	14.4873	14.4873
144h	23.6615	23.5751	34.923	34.9564		11.2615	11.3479	11.2949	11.3813									-1.26778	-1.18133	-1.23439	-1.14793		2.40791	2.26785	2.35282	2.21596		2.31114	0.0857023
ck_144h	20.9645	21.1074	33.6356	33.4948		12.6711	12.5282	12.5303	12.3875		12.5293		12.5293	12.5293	12.5293	12.5293
Time	Ta2291		TaGRF3-2D			△Ct					Average(△Ct)		Average(△Ct)					△△Ct					2^-△△Ct					Average(2^-△△Ct)	Stdeva
2h	22.2337	22.0387	35.3281	35.3044		13.0944	13.2894	13.0707	13.2657									0.571843	0.766826	0.548149	0.743131		0.672757	0.587709	0.683897	0.597441		0.635451	0.0498757
ck_2h	21.4494	21.4815	33.9591	34.0169		12.5098	12.4777	12.5675	12.5354		12.5226		12.5226	12.5226	12.5226	12.5226		-0.0128068	-0.0449121	0.0449121	0.0128068		1.00892	1.03162	0.969349	0.991162		1.00026	0.0264365
4h	22.2493	22.3699	35.6046	35.6913		13.3552	13.2346	13.442	13.3214									2.05402	1.93341	2.14074	2.02013		0.240813	0.261809	0.226764	0.246536		0.24398	0.0145007
ck_4h	21.5291	22.6883	33.4868	33.333		11.9577	10.7985	11.8039	10.6447		11.3012		11.3012	11.3012	11.3012	11.3012
8h	24.1974	24.096	41.3205	41.0945		17.1231	17.2245	16.8971	16.9985									3.08726	3.18867	2.86127	2.96268		0.117663	0.109676	0.137617	0.128276		0.123308	0.0122082
ck_8h	23.2176	22.432	36.4786	37.2426		13.261	14.0465	14.025	14.8106		14.0358		14.0358	14.0358	14.0358	14.0358
12h	23.8259	23.8055	36.0712	36.0002		12.2452	12.2657	12.1742	12.1947									-1.56152	-1.54107	-1.63251	-1.61206		2.95165	2.91011	3.10051	3.05687		3.00479	0.0888124
ck_12h	22.8199	22.8247	36.621	36.6371		13.8011	13.7962	13.8173	13.8124		13.8067		13.8067	13.8067	13.8067	13.8067
24h	25.1364	26.0461	42.0133	42.0715		16.8768	15.9672	16.9351	16.0254									2.35512	1.44544	2.41334	1.50366		0.195451	0.36718	0.18772	0.352657		0.275752	0.097419
ck_24h	22.6641	22.9356	37.3991	37.2441		14.735	14.4634	14.58	14.3085		14.5217		14.5217	14.5217	14.5217	14.5217
96h	25.289	25.1819	39.7534	42.396		14.4643	14.5715	17.107	17.2141									2.42171	2.52884	5.06436	5.1715		0.186635	0.173278	0.0298866	0.0277476		0.104387	0.087435
ck_96h	22.4824	22.8826	34.3029	35.1473		11.8205	11.4203	12.665	12.2647		12.0426		12.0426	12.0426	12.0426	12.0426
144h	26.4113	26.3284	37.8649	37.0946		11.4536	11.5365	10.6833	10.7662									0.086191	0.169043	-0.684092	-0.60124		0.942007	0.889432	1.60669	1.51702		1.23879	0.375452
ck_144h	22.962	23.0198	34.1979	34.5187		11.2359	11.1782	11.5567	11.4989		11.3674		11.3674	11.3674	11.3674	11.3674
Time	Ta2291		TaGRF4-4A			△Ct					Average(△Ct)		Average(△Ct)					△△Ct					2^-△△Ct					Average(2^-△△Ct)	Stdeva
2h	22.2337	22.0387	33.8329	33.3619		11.5992	11.7942	11.1282	11.3232									1.24727	1.44225	0.776226	0.971209		0.421244	0.367992	0.583892	0.510079		0.470802	0.0954952
ck_2h	21.4494	21.4815	31.7418	31.893		10.2924	10.2603	10.4436	10.4115		10.352		10.352	10.352	10.352	10.352		-0.0595667	-0.091672	0.091672	0.0595667		1.04215	1.0656	0.938434	0.959552		1.00144	0.0619109
4h	22.2493	22.3699	34.7212	34.6866		12.4719	12.3513	12.4373	12.3167									-2.14381	-2.26442	-2.17842	-2.29902		4.41929	4.80461	4.52657	4.92123		4.66792	0.23427
ck_4h	21.5291	22.6883	34.1468	39.3019		12.6178	11.4586	17.7728	16.6136		14.6157		14.6157	14.6157	14.6157	14.6157
8h	24.1974	24.096	34.7144	34.8007		10.517	10.6184	10.6033	10.7047									-1.7274	-1.62598	-1.64112	-1.53971		3.3113	3.08653	3.11908	2.90736		3.10606	0.165485
ck_8h	23.2176	22.432	35.9501	34.1883		12.7325	13.5181	10.9707	11.7562		12.2444		12.2444	12.2444	12.2444	12.2444
12h	23.8259	23.8055	33.7917	33.4189		9.96574	9.98619	9.593	9.61344									-0.0925767	-0.0721284	-0.465324	-0.444876		1.06627	1.05127	1.38063	1.3612		1.21484	0.180494
ck_12h	22.8199	22.8247	32.8358	32.9254		10.016	10.0111	10.1055	10.1007		10.0583		10.0583	10.0583	10.0583	10.0583
24h	25.6364	25.5461	36.0934	36.3998		10.457	10.5473	10.7634	10.8537									-1.22893	-1.13861	-0.922535	-0.832217		2.34393	2.20169	1.89544	1.78042		2.05537	0.261947
ck_24h	22.6641	22.9356	34.9304	34.0412		12.2663	11.9947	11.3771	11.1055		11.6859		11.6859	11.6859	11.6859	11.6859
96h	25.289	25.1819	35.6058	36.0911		10.3168	10.4239	10.8021	10.9092									-0.932615	-0.825478	-0.447332	-0.340195		1.90873	1.77212	1.36352	1.26593		1.57757	0.311159
ck_96h	22.4824	22.8826	33.7807	34.083		11.2983	10.8981	11.6007	11.2004		11.2494		11.2494	11.2494	11.2494	11.2494
144h	26.4113	26.3284	37.2509	37.6164		10.8396	10.9225	11.2051	11.2879									0.342612	0.425464	0.708051	0.790903		0.788612	0.744599	0.612146	0.577982		0.680835	0.101618
ck_144h	22.962	23.0198	33.4834	33.4925		10.5214	10.4636	10.5305	10.4727		10.497		10.497	10.497	10.497	10.497
Time	Ta2291		TaGRF4-4D			△Ct					Average(△Ct)		Average(△Ct)					△△Ct					2^-△△Ct					Average(2^-△△Ct)	Stdeva
2h	21.5271	21.3466	27.6689	27.763		6.14175	6.32229	6.23584	6.41638									0.0555385	0.236078	0.149625	0.330164		0.962235	0.849051	0.901485	0.795446		0.877054	0.0714067
ck_2h	20.3222	20.607	26.6088	26.4929		6.28656	6.00178	6.17064	5.88586		6.08621		6.08621	6.08621	6.08621	6.08621		0.200347	-0.0844336	0.0844336	-0.200347		0.870341	1.06027	0.943155	1.14897		1.00569	0.123477
4h	21.686	22.077	28.3157	28.5827		6.62969	6.23877	6.89669	6.50577									0.0525816	-0.338341	0.319585	-0.0713371		0.964209	1.2643	0.8013	1.05069		1.02013	0.192845
ck_4h	21.3034	21.8941	28.071	28.2807		6.7676	6.17691	6.9773	6.38661		6.57711		6.57711	6.57711	6.57711	6.57711
8h	23.2415	23.7124	29.7309	29.7294		6.48947	6.0185	6.4879	6.01693									0.995211	0.52424	0.993633	0.522662		0.501662	0.695325	0.502211	0.696086		0.598821	0.111873
ck_8h	23.9356	24.1306	29.4762	29.5786		5.54058	5.34555	5.64298	5.44795		5.49426		5.49426	5.49426	5.49426	5.49426
12h	23.0977	23.1941	27.8801	27.8801		4.78242	4.68598	4.78242	4.68598									-1.3523	-1.44873	-1.35229	-1.44873		2.55318	2.72968	2.55318	2.72968		2.64143	0.101903
ck_12h	22.0365	21.9698	28.129	28.1467		6.09249	6.15922	6.11021	6.17693		6.13471		6.13471	6.13471	6.13471	6.13471
24h	25.6855	25.5803	31.3866	31.3889		5.70104	5.80626	5.70338	5.80859									-1.4357	-1.33049	-1.43337	-1.32816		2.70514	2.51488	2.70077	2.51082		2.6079	0.109786
ck_24h	21.4821	21.6764	28.6674	28.7647		7.18527	6.99098	7.28251	7.08822		7.13675		7.13675	7.13675	7.13675	7.13675
96h	24.67	24.7222	31.9657	32.1646		7.29566	7.24347	7.49457	7.44238									0.63554	0.583351	0.834449	0.782261		0.6437	0.667412	0.560797	0.581455		0.613341	0.0504079
ck_96h	21.026	21.0756	27.6891	27.7328		6.6631	6.6134	6.70684	6.65714		6.66012		6.66012	6.66012	6.66012	6.66012
144h	24.4699	24.7641	33.8509	33.8374		9.38101	9.08684	9.36751	9.07334									3.14169	2.84751	3.12819	2.83401		0.113307	0.138936	0.114373	0.140242		0.126714	0.014882
ck_144h	22.4551	22.9931	29.0187	28.9081		6.56364	6.02562	6.45303	5.91501		6.23932		6.23932	6.23932	6.23932	6.23932
Time	Ta2291		TaGRF5-4A			△Ct					Average(△Ct)		Average(△Ct)					△△Ct					2^-△△Ct					Average(2^-△△Ct)	Stdeva
2h	22.2337	22.0387	33.2586	33.058		11.025	11.22	10.8243	11.0193									0.0830936	0.278076	-0.117548	0.0774348		0.944031	0.82469	1.08489	0.947741		0.950338	0.106361
ck_2h	21.4494	21.4815	32.4634	32.3512		11.0141	10.982	10.9018	10.8697		10.9419		10.9419	10.9419	10.9419	10.9419		0.0721752	0.0400698	-0.0400698	-0.0721752		0.951203	0.972608	1.02816	1.0513		1.00082	0.0467395
4h	22.2493	22.3699	33.3037	33.4387		11.0544	10.9338	11.1894	11.0688									0.803776	0.683173	0.938752	0.818149		0.572848	0.622794	0.521684	0.567169		0.571124	0.0413631
ck_4h	21.5291	22.6883	32.4474	32.2712		10.9183	9.75908	10.7421	9.58292		10.2506		10.2506	10.2506	10.2506	10.2506
8h	24.1974	24.096	33.437	33.4427		9.23965	9.34106	9.2453	9.34671									-0.775581	-0.67417	-0.769928	-0.668517		1.71188	1.59568	1.70519	1.58944		1.65055	0.067062
ck_8h	23.2176	22.432	32.7399	32.9402		9.52232	10.3079	9.72259	10.5081		10.0152		10.0152	10.0152	10.0152	10.0152
12h	23.8259	23.8055	34.1725	33.7943		10.3466	10.3671	9.96832	9.98877									0.470968	0.491417	0.0926886	0.113137		0.72148	0.711326	0.937773	0.924576		0.823789	0.124184
ck_12h	22.8199	22.8247	32.6431	32.7527		9.82327	9.81841	9.93286	9.92801		9.87564		9.87564	9.87564	9.87564	9.87564
24h	25.6364	25.5461	36.5823	35.9993		10.9458	11.0362	10.3629	10.4532									1.74966	1.83998	1.16675	1.25707		0.297372	0.279326	0.445425	0.418394		0.360129	0.0839399
ck_24h	22.6641	22.9356	31.9308	32.0613		9.26668	8.99512	9.39723	9.12568		9.19618		9.19618	9.19618	9.19618	9.19618
96h	25.289	25.1819	33.8982	33.7573		8.60912	8.71626	8.46828	8.57542									-0.365043	-0.257906	-0.505885	-0.398748		1.28792	1.19574	1.41999	1.31836		1.3055	0.0924307
ck_96h	22.4824	22.8826	31.9074	31.4059		9.42506	9.02483	8.9235	8.52327		8.97417		8.97417	8.97417	8.97417	8.97417
144h	26.4113	26.3284	34.6697	34.4916		8.25847	8.34132	8.08036	8.16321									-2.27403	-2.19117	-2.45214	-2.36929		4.83671	4.56677	5.47227	5.16686		5.01065	0.393609
ck_144h	22.962	23.0198	33.7515	33.2952		10.7895	10.7318	10.3332	10.2755		10.5325		10.5325	10.5325	10.5325	10.5325
Time	Ta2291		TaGRF6-4A			△Ct					Average(△Ct)		Average(△Ct)					△△Ct					2^-△△Ct					Average(2^-△△Ct)	Stdeva
2h	21.5271	21.3466	34.5403	34.4938		13.0132	13.1937	12.9666	13.1472									0.336899	0.517438	0.290349	0.470888		0.791741	0.698611	0.817704	0.72152		0.757394	0.0564487
ck_2h	20.4222	20.507	33.1384	33.1434		12.7162	12.6314	12.7211	12.6364		12.6763		12.6763	12.6763	12.6763	12.6763		0.039914	-0.0448667	0.0448667	-0.039914		0.972713	1.03159	0.969379	1.02805		1.00043	0.0339912
4h	21.686	22.077	35.1033	35.1711		13.4172	13.0263	13.4851	13.0942									-1.25545	-1.64637	-1.18761	-1.57853		2.38742	3.13046	2.27775	2.98666		2.69557	0.425594
ck_4h	21.3034	21.8941	36.4634	36.0795		15.16	14.5693	14.7761	14.1854		14.6727		14.6727	14.6727	14.6727	14.6727
8h	23.2415	23.7124	37.4166	37.249		14.1752	13.7042	14.0075	13.5366									2.01912	1.54815	1.8515	1.38053		0.246709	0.341948	0.277104	0.384077		0.31246	0.0621073
ck_8h	23.9356	24.1306	36.1602	36.2181		12.2246	12.0295	12.2825	12.0875		12.156		12.156	12.156	12.156	12.156
12h	23.0977	23.1941	36.4433	36.2598		13.3456	13.2492	13.1621	13.0657									0.881419	0.784981	0.69789	0.601453		0.542833	0.580359	0.616473	0.65909		0.599689	0.0497205
ck_12h	22.0365	21.9698	34.4786	34.4561		12.4421	12.5088	12.4196	12.4863		12.4642		12.4642	12.4642	12.4642	12.4642
24h	25.6855	25.5803	36.6791	36.675		10.9936	11.0988	10.9894	11.0947									-2.79703	-2.69181	-2.8012	-2.69598		6.95008	6.46126	6.97018	6.47994		6.71536	0.282853
ck_24h	21.4821	21.6764	35.5335	35.2064		14.0513	13.857	13.7242	13.5299		13.7906		13.7906	13.7906	13.7906	13.7906
96h	24.67	24.7222	35.9804	36.0531		11.3104	11.2582	11.3831	11.3309									-3.13758	-3.18977	-3.06487	-3.11706		8.80046	9.12464	8.36793	8.67617		8.7423	0.3131
ck_96h	21.026	21.0756	35.4551	35.5424		14.4292	14.3795	14.5164	14.4667		14.448		14.448	14.448	14.448	14.448
144h	24.4699	24.7641	36.0409	36.084		11.571	11.2769	11.6141	11.3199									0.771715	0.47754	0.814733	0.520557		0.585721	0.718201	0.568514	0.697102		0.642385	0.0761794
ck_144h	22.4551	22.9931	33.1358	33.911		10.6808	10.1427	11.4559	10.9179		10.7993		10.7993	10.7993	10.7993	10.7993
Time	Ta2291		TaGRF9-6D			△Ct					Average(△Ct)		Average(△Ct)					△△Ct					2^-△△Ct					Average(2^-△△Ct)	Stdeva
2h	20.3416	20.6706	32.7377	32.5261		12.396	12.067	12.1845	11.8555									-0.221716	-0.550687	-0.433243	-0.762213		1.16612	1.46478	1.35027	1.69609		1.41931	0.221771
ck_2h	20.0884	20.187	33.0112	32.4997		12.9228	12.8242	12.4112	12.3127		12.6177		12.6177	12.6177	12.6177	12.6177		0.305047	0.206501	-0.206501	-0.305047		0.809416	0.866636	1.15389	1.23546		1.01635	0.20989
4h	21.355	21.1677	31.7254	31.6252		10.3704	10.5577	10.2703	10.4576									0.394953	0.582253	0.294823	0.482123		0.760514	0.66792	0.815172	0.715923		0.739882	0.0628407
ck_4h	20.7281	20.884	30.5576	31.0054		9.82948	9.67357	10.2773	10.1214		9.97544		9.97544	9.97544	9.97544	9.97544
8h	22.3789	22.4412	34.2241	34.0502		11.8452	11.7829	11.6713	11.609									0.421817	0.35949	0.247906	0.185578		0.746484	0.77944	0.842118	0.879296		0.811835	0.0599675
ck_8h	22.0767	22.2551	33.9231	33.2554		11.8465	11.668	11.1787	11.0003		11.4234		11.4234	11.4234	11.4234	11.4234
12h	22.5952	22.7307	34.4336	34.4384		11.8384	11.7029	11.8432	11.7077									-0.503361	-0.638857	-0.49854	-0.634035		1.41751	1.55709	1.41278	1.5519		1.48482	0.0805047
ck_12h	21.4968	21.6212	34.2855	33.5161		12.7886	12.6643	12.0193	11.8949		12.3418		12.3418	12.3418	12.3418	12.3418
24h	25.0517	25.0237	32.7073	32.7092		7.65559	7.68358	7.65749	7.68549									-4.58812	-4.56013	-4.58622	-4.55822		24.0527	23.5904	24.0209	23.5593		23.8058	0.267305
ck_24h	20.8427	21.1302	33.0809	33.3795		12.2382	11.9507	12.5367	12.2492		12.2437		12.2437	12.2437	12.2437	12.2437
96h	23.5673	23.9122	32.7265	32.8507		9.15919	8.81438	9.28331	8.93851									-2.65081	-2.99561	-2.52668	-2.87149		6.28019	7.97572	5.76243	7.31818		6.83413	0.998819
ck_96h	20.4261	20.7536	32.3829	32.4167		11.9568	11.6293	11.9907	11.6632		11.81		11.81	11.81	11.81	11.81
144h	23.8559	24.227	33.3418	33.2674		9.48586	9.11473	9.41151	9.04038									-1.44958	-1.82071	-1.52392	-1.89505		2.73128	3.53255	2.87572	3.71936		3.21472	0.48453
ck_144h	21.7981	22.0471	32.9929	32.7232		11.1948	10.9458	10.9251	10.676		10.9354		10.9354	10.9354	10.9354	10.9354
Time	Ta2291		TaGRF10-6A			△Ct					Average(△Ct)		Average(△Ct)					△△Ct					2^-△△Ct					Average(2^-△△Ct)	Stdeva
2h	21.5271	21.3466	31.1118	31.081		9.58468	9.76521	9.55387	9.73441									0.0963697	0.276909	0.0655629	0.246102		0.935384	0.825358	0.955572	0.843172		0.889871	0.0651432
ck_2h	20.3222	20.607	30.0006	29.9052		9.67841	9.39363	9.58298	9.2982		9.48831		9.48831	9.48831	9.48831	9.48831		0.190106	-0.094675	0.094675	-0.190106		0.876541	1.06782	0.936483	1.14085		1.00542	0.12055
4h	21.686	22.077	31.338	31.4517		9.65201	9.26108	9.76564	9.37472									-0.362008	-0.75293	-0.248377	-0.6393		1.28521	1.68521	1.18787	1.55757		1.42897	0.231656
ck_4h	21.3034	21.8941	31.6284	31.5971		10.325	9.73434	10.2937	9.703		10.014		10.014	10.014	10.014	10.014
8h	23.2415	23.7124	32.1264	32.3388		8.88489	8.41392	9.09734	8.62637									0.754837	0.283866	0.967284	0.496312		0.592613	0.821387	0.511468	0.708916		0.658596	0.135442
ck_8h	23.9356	24.1306	32.0202	32.3061		8.08459	7.88957	8.37054	8.17552		8.13006		8.13006	8.13006	8.13006	8.13006
12h	23.0977	23.1941	31.9608	31.9605		8.86311	8.76668	8.86284	8.7664									-0.863417	-0.959855	-0.863696	-0.960133		1.81934	1.94511	1.81969	1.94549		1.88241	0.0726214
ck_12h	22.0365	21.9698	31.7659	31.6935		9.72936	9.79608	9.65698	9.7237		9.72653		9.72653	9.72653	9.72653	9.72653
24h	25.6855	25.5803	32.9109	32.9891		7.22534	7.33055	7.30354	7.40875									-2.9163	-2.81108	-2.83809	-2.73288		7.54906	7.0181	7.15074	6.6478		7.09142	0.371986
ck_24h	21.4821	21.6764	31.6398	31.802		10.1577	9.9634	10.3199	10.1256		10.1416		10.1416	10.1416	10.1416	10.1416
96h	24.67	24.7222	34.0378	34.0398		9.36775	9.31556	9.36976	9.31757									-5.08021	-5.13239	-5.07819	-5.13038		33.8294	35.0756	33.7822	35.0266		34.4284	0.719503
ck_96h	21.026	21.0756	35.4551	35.5424		14.4292	14.3795	14.5164	14.4667		14.448		14.448	14.448	14.448	14.448
144h	24.4699	24.7641	34.6508	34.5751		10.1809	9.88674	10.1052	9.81106									1.51377	1.2196	1.43809	1.14392		0.350194	0.429402	0.369055	0.452529		0.400295	0.0485169
ck_144h	22.4551	22.9931	31.4072	31.3752		8.95216	8.41414	8.92014	8.38212		8.66714		8.66714	8.66714	8.66714	8.66714
Time	Ta2291		TaGRF10-6B			△Ct					Average(△Ct)		Average(△Ct)					△△Ct					2^-△△Ct					Average(2^-△△Ct)	Stdeva
2h	20.3416	20.6706	31.0898	30.6553		10.7482	10.4192	10.3137	9.98472									1.11997	0.791	0.685472	0.356501		0.460103	0.577944	0.621803	0.781056		0.610226	0.132785
ck_2h	20.0884	20.187	29.775	29.7568		9.68656	9.58801	9.66842	9.56988		9.62822		9.62822	9.62822	9.62822	9.62822		0.0583408	-0.0402052	0.0402052	-0.0583408		0.960368	1.02826	0.972517	1.04127		1.0006	0.0401091
4h	21.355	21.1677	29.9114	30.335		8.5564	8.7437	8.98006	9.16736									0.264571	0.451871	0.688226	0.875526		0.832446	0.731094	0.620616	0.545055		0.682303	0.125918
ck_4h	20.7281	20.884	28.8788	29.317		8.1507	7.9948	8.58887	8.43296		8.29183		8.29183	8.29183	8.29183	8.29183
8h	22.3789	22.4412	31.4613	31.644		9.08238	9.02005	9.26513	9.20281									-0.478297	-0.540625	-0.295545	-0.357873		1.3931	1.4546	1.22735	1.28153		1.33915	0.103374
ck_8h	22.0767	22.2551	31.7326	31.7205		9.65595	9.47751	9.64385	9.46541		9.56068		9.56068	9.56068	9.56068	9.56068
12h	22.5952	22.7307	31.6413	31.4531		9.0461	8.9106	8.85789	8.72239									-0.89093	-1.02643	-1.07914	-1.21464		1.85437	2.03697	2.11278	2.32082		2.08124	0.193066
ck_12h	21.4968	21.6212	31.5541	31.438		10.0573	9.93294	9.94112	9.81676		9.93703		9.93703	9.93703	9.93703	9.93703
24h	25.0517	25.0237	32.0374	31.8786		6.98572	7.01372	6.82696	6.85495									-2.1676	-2.1396	-2.32636	-2.29837		4.49275	4.40641	5.01539	4.919		4.70839	0.30348
ck_24h	20.8427	21.1302	30.2697	30.0099		9.427	9.13952	9.16712	8.87964		9.15332		9.15332	9.15332	9.15332	9.15332
96h	23.5673	23.9122	32.1874	32.2073		8.62005	8.27524	8.63999	8.29518									-1.53653	-1.88133	-1.51659	-1.86139		2.90095	3.68415	2.86113	3.63359		3.26996	0.449847
ck_96h	20.4261	20.7536	30.7754	30.7174		10.3493	10.0218	10.2914	9.96386		10.1566		10.1566	10.1566	10.1566	10.1566
144h	23.8559	24.227	33.6183	33.46		9.76238	9.39125	9.60407	9.23294									0.953774	0.582642	0.795459	0.424328		0.51628	0.66774	0.57616	0.745186		0.626341	0.100779
ck_144h	21.7981	22.0471	30.7924	30.67		8.99435	8.74533	8.87189	8.62286		8.80861		8.80861	8.80861	8.80861	8.80861
Time	Ta2291		TaGRF10-6D			△Ct					Average(△Ct)		Average(△Ct)					△△Ct					2^-△△Ct					Average(2^-△△Ct)	Stdeva
2h	20.3416	20.6706	29.5589	29.9798		9.21724	8.88827	9.63812	9.30915									0.202506	-0.126465	0.62338	0.29441		0.86904	1.09162	0.649148	0.815406		0.856302	0.182683
ck_2h	20.0884	20.187	29.1748	29.13		9.08641	8.98786	9.04161	8.94306		9.01474		9.01474	9.01474	9.01474	9.01474		0.071674	-0.026872	0.026872	-0.071674		0.951533	1.0188	0.981546	1.05094		1.0007	0.0433415
4h	21.355	21.1677	31.1536	31.3661		9.79865	9.98595	10.0112	10.1985									-0.201971	-0.0146713	0.0105598	0.19786		1.15027	1.01022	0.992707	0.871843		1.00626	0.114026
ck_4h	20.7281	20.884	30.7522	30.8612		10.024	9.86814	10.1331	9.97719		10.0006		10.0006	10.0006	10.0006	10.0006
8h	22.3789	22.4412	31.6218	31.7833		9.24291	9.18058	9.40439	9.34206									-0.415031	-0.477358	-0.253545	-0.315872		1.33333	1.39219	1.19213	1.24476		1.2906	0.0893369
ck_8h	22.0767	22.2551	32.0293	31.6184		9.95262	9.77418	9.54169	9.36325		9.65794		9.65794	9.65794	9.65794	9.65794
12h	22.5952	22.7307	31.2051	31.1854		8.60993	8.47444	8.59022	8.45473									-0.574108	-0.709604	-0.593817	-0.729313		1.48876	1.63536	1.50923	1.65785		1.5728	0.0861205
ck_12h	21.4968	21.6212	30.739	30.7471		9.24217	9.11782	9.25026	9.1259		9.18404		9.18404	9.18404	9.18404	9.18404
24h	25.0517	25.0237	34.9012	35.2718		9.8495	9.87749	10.2202	10.2482									0.140951	0.168945	0.511619	0.539614		0.906921	0.889493	0.701435	0.687955		0.796451	0.117842
ck_24h	20.8427	21.1302	30.7193	30.6708		9.87652	9.58904	9.82805	9.54057		9.70855		9.70855	9.70855	9.70855	9.70855
96h	23.5673	23.9122	33.4915	33.649		9.92416	9.57935	10.0817	9.73689									0.521409	0.176601	0.678949	0.334142		0.696691	0.884785	0.62462	0.793256		0.749838	0.113431
ck_96h	20.4261	20.7536	29.9792	30.0059		9.55311	9.22562	9.57989	9.25239		9.40275		9.40275	9.40275	9.40275	9.40275
144h	23.8559	24.227	34.1708	34.5524		10.3149	9.94375	10.6965	10.3254									1.34071	0.969575	1.72233	1.3512		0.394827	0.510656	0.303059	0.391966		0.400127	0.0851149
ck_144h	21.7981	22.0471	31.1602	30.6333		9.36213	9.1131	8.83524	8.58621		8.97417		8.97417	8.97417	8.97417	8.97417
Time	Ta2291		TaGRF11-7A			△Ct					Average(△Ct)		Average(△Ct)					△△Ct					2^-△△Ct					Average(2^-△△Ct)	Stdeva
2h	21.3596	21.4149	28.4054	28.8091		7.04582	6.99054	7.44953	7.39425									-0.519026	-0.5743	-0.115315	-0.170589		1.43299	1.48895	1.08321	1.12552		1.28267	0.207869
ck_2h	20.7418	20.8307	28.2881	28.4141		7.54632	7.45743	7.67225	7.58337		7.56484		7.56484	7.56484	7.56484	7.56484		-0.0185232	-0.107411	0.107411	0.0185232		1.01292	1.07729	0.928252	0.987243		1.00143	0.061762
4h	21.6428	21.6193	29.0072	28.8873		7.36439	7.3879	7.24448	7.26798									0.352221	0.375728	0.232307	0.255814		0.783377	0.770717	0.851272	0.837515		0.81072	0.0396247
ck_4h	21.4941	21.4472	28.5802	28.3854		7.08613	7.13298	6.89136	6.9382		7.01217		7.01217	7.01217	7.01217	7.01217
8h	22.979	22.9775	29.5192	29.2841		6.54027	6.54175	6.30513	6.30661									-0.143265	-0.14178	-0.378406	-0.376921		1.1044	1.10327	1.29991	1.29857		1.20154	0.112818
ck_8h	23.0013	23.1461	29.651	29.8634		6.64975	6.5049	6.86217	6.71731		6.68353		6.68353	6.68353	6.68353	6.68353
12h	23.8209	23.8294	30.0502	30.1055		6.22928	6.22081	6.28463	6.27616									-1.96735	-1.97581	-1.91199	-1.92046		3.91048	3.9335	3.76329	3.78544		3.84818	0.0862252
ck_12h	22.1162	22.1012	30.8189	29.7917		8.7027	8.71766	7.67559	7.69055		8.19662		8.19662	8.19662	8.19662	8.19662
24h	25.2116	25.5616	32.8964	33.119		7.68481	7.33477	7.90745	7.55741									0.45272	0.102678	0.675359	0.325317		0.730664	0.931302	0.626176	0.798123		0.771566	0.127844
ck_24h	21.8827	21.7717	29.2082	28.9104		7.32551	7.43649	7.02769	7.13867		7.23209		7.23209	7.23209	7.23209	7.23209
96h	24.5196	24.6608	31.4258	31.4643		6.90621	6.76499	6.94475	6.80354									0.0571568	-0.0840589	0.0957022	-0.0455136		0.961156	1.06	0.935817	1.03205		0.997255	0.0583808
ck_96h	21.6151	21.6596	28.5711	28.4017		6.95604	6.91147	6.78663	6.74206		6.84905		6.84905	6.84905	6.84905	6.84905
144h	25.6497	25.701	32.0612	32.3226		6.41145	6.36017	6.67287	6.62159									-0.367125	-0.418406	-0.105703	-0.156984		1.28978	1.33645	1.07602	1.11495		1.2043	0.128075
ck_144h	22.4551	22.9931	29.4856	29.5198		7.0305	6.49248	7.06468	6.52665		6.77858		6.77858	6.77858	6.77858	6.77858
Time	Ta2291		TaGRF11-7D			△Ct					Average(△Ct)		Average(△Ct)					△△Ct					2^-△△Ct					Average(2^-△△Ct)	Stdeva
2h	21.3596	21.4149	30.1597	30.1462		8.80014	8.74487	8.78664	8.73137									-0.830867	-0.886141	-0.844368	-0.899642		1.77875	1.84823	1.79548	1.8656		1.82202	0.0414837
ck_2h	20.7418	20.8307	30.2546	30.58		9.51277	9.42388	9.83814	9.74925		9.63101		9.63101	9.63101	9.63101	9.63101		-0.11824	-0.207129	0.207129	0.11824		1.08541	1.15439	0.86626	0.921311		1.00684	0.135428
4h	21.6428	21.6193	30.3473	30.8628		8.70448	8.72799	9.22	9.2435									0.500609	0.524115	1.01612	1.03963		0.706809	0.695386	0.494444	0.486453		0.595773	0.121751
ck_4h	21.4941	21.4472	29.8194	29.5297		8.32528	8.37212	8.03563	8.08247		8.20387		8.20387	8.20387	8.20387	8.20387
8h	22.979	22.9775	29.6525	30.3325		6.67348	6.67497	7.35351	7.355									-1.19716	-1.19568	-0.517133	-0.515648		2.29288	2.29052	1.43111	1.42964		1.86104	0.49729
ck_8h	23.0013	23.1461	30.7562	31.1325		7.75492	7.61006	8.13122	7.98637		7.87064		7.87064	7.87064	7.87064	7.87064
12h	23.8209	23.8294	31.4597	31.114		7.63886	7.63039	7.2931	7.28464									-0.184713	-0.193181	-0.530466	-0.538933		1.13659	1.14328	1.4444	1.4529		1.29429	0.178289
ck_12h	22.1162	22.1012	30.0375	29.827		7.92135	7.93631	7.71083	7.72579		7.82357		7.82357	7.82357	7.82357	7.82357
24h	25.2116	25.5616	33.1848	33.4037		7.97319	7.62315	8.19216	7.84212									-0.683215	-1.03326	-0.464248	-0.81429		1.60571	2.04664	1.3796	1.75843		1.6976	0.279939
ck_24h	21.8827	21.7717	30.6604	30.3068		8.77774	8.88872	8.42409	8.53507		8.65641		8.65641	8.65641	8.65641	8.65641
96h	24.5196	24.6608	32.073	32.0461		7.55345	7.41223	7.52655	7.38533									-0.175324	-0.31654	-0.202225	-0.343441		1.12922	1.24534	1.15047	1.26878		1.19845	0.0688957
ck_96h	21.6151	21.6596	29.3112	29.4211		7.69612	7.65154	7.80601	7.76143		7.72877		7.72877	7.72877	7.72877	7.72877
144h	25.6497	25.701	32.778	32.9159		7.12834	7.07706	7.26614	7.21486									-0.827338	-0.878619	-0.689534	-0.740815		1.77441	1.83861	1.61276	1.67112		1.72423	0.101402
ck_144h	22.4551	22.9931	30.6732	30.6864		8.2181	7.68008	8.23127	7.69325		7.95568		7.95568	7.95568	7.95568	7.95568

## Sheet: NaCl Leaf
NaCl Leaf
Time	Ta2291		TaGRF1-2B			△Ct					Average(△Ct)		Average(△Ct)					△△Ct					2^-△△Ct					Average(2^-△△Ct)	Stdeva
2h	22.2239	22.5415	26.562	26.4327		4.33808	4.02053	4.2088	3.89124									0.656992	0.339437	0.527706	0.210151		0.634199	0.79035	0.693657	0.864447		0.745663	0.102038
ck_2h	24.1268	24.3781	27.6564	28.2107		3.5296	3.27829	4.08389	3.83258		3.68109		3.68109	3.68109	3.68109	3.68109		-0.151488	-0.4028	0.4028	0.151488		1.11071	1.32207	0.756389	0.900321		1.02237	0.247162
4h	23.2739	23.3714	26.9874	27.0302		3.71347	3.616	3.75627	3.65879									0.0323829	-0.0650907	0.0751768	-0.0222969		0.977804	1.04615	0.949226	1.01558		0.997189	0.0424717
ck_4h	24.1268	24.3781	27.6564	28.2107		3.5296	3.27829	4.08389	3.83258		3.68109		3.68109	3.68109	3.68109	3.68109
8h	23.9103	23.696	27.8974	27.8102		3.98717	4.20147	3.89995	4.11425									0.655433	0.869731	0.568217	0.782515		0.634885	0.547249	0.67445	0.581352		0.609484	0.056363
ck_8h	26.0811	25.6496	29.3094	29.0849		3.22822	3.65975	3.00372	3.43526		3.33174		3.33174	3.33174	3.33174	3.33174
12h	23.7313	23.7486	27.4203	27.3949		3.68892	3.67164	3.6636	3.64632									-0.382448	-0.399728	-0.407777	-0.425057		1.30355	1.31926	1.32664	1.34263		1.32302	0.0162339
ck_12h	23.051	22.9331	26.9809	27.146		3.92988	4.04779	4.09496	4.21286		4.07137		4.07137	4.07137	4.07137	4.07137
24h	23.6777	23.8125	27.5565	27.5212		3.87883	3.74402	3.84353	3.70871									0.314052	0.179239	0.27875	0.143938		0.80438	0.883169	0.824305	0.905046		0.854225	0.0476104
ck_24h	23.6294	23.8159	26.9595	27.6154		3.33008	3.1436	3.98596	3.79948		3.56478		3.56478	3.56478	3.56478	3.56478
96h	20.3163	20.5843	27.2167	27.1266		6.90039	6.63235	6.81031	6.54227									5.52341	5.25536	5.43333	5.16529		0.0217415	0.0261805	0.0231422	0.0278672		0.0247328	0.00279275
ck_96h	22.773	22.5363	23.9475	24.1158		1.17441	1.41119	1.34277	1.57956		1.37698		1.37698	1.37698	1.37698	1.37698
144h	21.6503	22.2463	26.3327	26.8025		4.68242	4.08645	5.15217	4.5562									1.50844	0.912465	1.97818	1.38221		0.351492	0.531276	0.25381	0.383631		0.380053	0.114941
ck_144h	22.9887	22.3995	26.1953	25.5409		3.20656	3.79578	2.5522	3.14142		3.17399		3.17399	3.17399	3.17399	3.17399
Time	Ta2291		TaGRF1-2D			△Ct					Average(△Ct)		Average(△Ct)					△△Ct					2^-△△Ct					Average(2^-△△Ct)	Stdeva
2h	22.2239	22.5415	24.6206	24.807		2.39674	2.07919	2.58305	2.26549									-1.54896	-1.86651	-1.36265	-1.68021		2.92606	3.6465	2.57158	3.20474		3.08722	0.454045
ck_2h	24.1268	24.3781	28.1879	28.2085		4.06106	3.80974	4.08166	3.83035		3.9457		3.9457	3.9457	3.9457	3.9457		0.115353	-0.135959	0.135959	-0.115353		0.923156	1.09882	0.910065	1.08324		1.00382	0.101044
4h	23.2739	23.3714	25.9705	26.2338		2.6966	2.59913	2.95985	2.86238									-1.2491	-1.34658	-0.985852	-1.08333		2.37694	2.54308	1.98048	2.11891		2.25485	0.252809
ck_4h	24.1268	24.3781	28.1879	28.2085		4.06106	3.80974	4.08166	3.83035		3.9457		3.9457	3.9457	3.9457	3.9457
8h	23.9103	23.696	25.4408	26.2708		1.53051	1.74481	2.3605	2.5748									-0.918428	-0.70413	-0.0884427	0.125856		1.89005	1.62916	1.06322	0.91646		1.37472	0.460921
ck_8h	26.0811	25.6496	28.4148	28.2138		2.33365	2.76518	2.1327	2.56423		2.44894		2.44894	2.44894	2.44894	2.44894
12h	23.7313	23.7486	27.099	27.3845		3.36764	3.35036	3.65318	3.6359									-0.441152	-0.458432	-0.155617	-0.172896		1.35769	1.37405	1.1139	1.12732		1.24324	0.141864
ck_12h	23.051	22.9331	27.2805	26.3212		4.2295	4.34741	3.27018	3.38808		3.80879		3.80879	3.80879	3.80879	3.80879
24h	23.6777	23.8125	26.8519	26.8025		3.17416	3.03934	3.12476	2.98995									-1.47251	-1.60732	-1.5219	-1.65671		2.77503	3.04685	2.87169	3.15297		2.96163	0.170079
ck_24h	23.6294	23.8159	28.2189	28.5198		4.58944	4.40296	4.89036	4.70388		4.64666		4.64666	4.64666	4.64666	4.64666
96h	20.3163	20.5843	27.2278	27.6955		6.91152	6.64348	7.37927	7.11122									4.77019	4.50215	5.23794	4.9699		0.0366462	0.0441284	0.0264986	0.0319089		0.0347955	0.00747658
ck_96h	22.773	22.5363	24.8814	24.7105		2.1084	2.34518	1.93748	2.17426		2.14133		2.14133	2.14133	2.14133	2.14133
144h	21.6503	22.2463	26.439	26.9528		4.78866	4.19269	5.30244	4.70647									1.17216	0.576194	1.68595	1.08998		0.443755	0.670731	0.310799	0.469769		0.473763	0.148627
ck_144h	22.9887	22.3995	26.2288	26.3924		3.24012	3.82934	3.40365	3.99287		3.61649		3.61649	3.61649	3.61649	3.61649
Time	Ta2291		TaGRF3-2B			△Ct					Average(△Ct)		Average(△Ct)					△△Ct					2^-△△Ct					Average(2^-△△Ct)	Stdeva
2h	22.2239	22.5415	33.5113	34.2446		11.2874	10.9699	12.0207	11.7032									-0.00669236	-0.324247	0.726611	0.409056		1.00465	1.25201	0.604322	0.753116		0.903525	0.285081
ck_2h	24.1268	24.3781	35.6807	35.4125		11.5539	11.3025	11.2857	11.0344		11.2941		11.2941	11.2941	11.2941	11.2941		0.259731	0.00841885	-0.00841885	-0.259731		0.835244	0.994181	1.00585	1.19726		1.00813	0.148164
4h	23.2739	23.3714	33.6377	33.5285		10.3638	10.2663	10.2546	10.1571									-0.930331	-1.0278	-1.03956	-1.13703		1.90571	2.03892	2.0556	2.19928		2.04988	0.120079
ck_4h	24.1268	24.3781	35.6807	35.4125		11.5539	11.3025	11.2857	11.0344		11.2941		11.2941	11.2941	11.2941	11.2941
8h	23.9103	23.696	35.4745	35.0697		11.5642	11.7785	11.1595	11.3737									2.04242	2.25672	1.63767	1.85197		0.242756	0.209248	0.321375	0.277014		0.262598	0.0479671
ck_8h	26.0811	25.6496	35.3092	35.4651		9.22803	9.65956	9.384	9.81553		9.52178		9.52178	9.52178	9.52178	9.52178
12h	23.7313	23.7486	35.229	34.9688		11.4977	11.4804	11.2375	11.2202									0.0662174	0.0489374	-0.194002	-0.211282		0.955139	0.966648	1.14393	1.15772		1.05586	0.109901
ck_12h	23.051	22.9331	34.3254	34.5218		11.2743	11.3922	11.4707	11.5887		11.4315		11.4315	11.4315	11.4315	11.4315
24h	23.6777	23.8125	35.9519	36.3475		12.2742	12.1393	12.6697	12.5349									-3.56106	-3.69587	-3.16549	-3.3003		11.8028	12.9589	8.97236	9.8512		10.8963	1.81382
ck_24h	23.6294	23.8159	38.4575	40.6583		14.8281	14.6416	17.0288	16.8424		15.8352		15.8352	15.8352	15.8352	15.8352
96h	20.3163	20.5843	33.3403	33.3754		13.024	12.756	13.0591	12.7911									2.56044	2.29239	2.59554	2.32749		0.169524	0.204136	0.16545	0.19923		0.184585	0.0199141
ck_96h	22.773	22.5363	33.6474	32.5891		10.8744	11.1112	9.81602	10.0528		10.4636		10.4636	10.4636	10.4636	10.4636
144h	21.6503	22.2463	37.6959	36.9385		16.0455	15.4496	15.2882	14.6923									3.72115	3.12518	2.96383	2.36786		0.0758269	0.114611	0.128174	0.193733		0.128086	0.049065
ck_144h	22.9887	22.3995	35.7153	34.3217		12.7266	13.3158	11.333	11.9222		12.3244		12.3244	12.3244	12.3244	12.3244
Time	Ta2291		TaGRF3-2D			△Ct					Average(△Ct)		Average(△Ct)					△△Ct					2^-△△Ct					Average(2^-△△Ct)	Stdeva
2h	24.2724	24.0238	33.2071	33.2063		8.93469	9.1833	8.93386	9.18246									0.118872	0.367478	0.118034	0.36664		0.920908	0.775137	0.921442	0.775586		0.848268	0.0841859
ck_2h	25.7145	25.6488	34.453	34.5419		8.73857	8.8042	8.82744	8.89307		8.81582		8.81582	8.81582	8.81582	8.81582		-0.0772511	-0.0116207	0.0116207	0.0772511		1.05501	1.00809	0.991977	0.947862		1.00073	0.0442404
4h	24.0932	23.8923	33.0719	33.2764		8.97876	9.17963	9.18323	9.3841									0.162934	0.363807	0.367406	0.568279		0.893207	0.777111	0.775175	0.674421		0.779978	0.0894321
ck_4h	25.7145	25.6488	34.453	34.5419		8.73857	8.8042	8.82744	8.89307		8.81582		8.81582	8.81582	8.81582	8.81582
8h	23.975	24.2549	32.4515	32.2841		8.47653	8.19657	8.3091	8.02915									-1.09081	-1.37076	-1.25823	-1.53818		2.12993	2.58606	2.39202	2.90428		2.50307	0.326305
ck_8h	24.3454	24.2551	33.5515	34.1836		9.20609	9.29645	9.83821	9.92857		9.56733		9.56733	9.56733	9.56733	9.56733
12h	24.0053	24.4054	31.9523	32.4783		7.94693	7.54685	8.47298	8.0729									-0.494346	-0.894425	0.0317046	-0.368375		1.40868	1.85887	0.978264	1.2909		1.38418	0.364874
ck_12h	24.1347	24.0286	32.4114	32.6345		8.27665	8.3828	8.49975	8.6059		8.44127		8.44127	8.44127	8.44127	8.44127
24h	23.5451	23.562	33.9621	33.7222		10.417	10.4001	10.1771	10.1602									-0.153906	-0.170791	-0.393836	-0.41072		1.11258	1.12568	1.31388	1.32935		1.22037	0.117199
ck_24h	23.5099	23.6765	33.9647	34.3635		10.4549	10.2883	10.8536	10.687		10.5709		10.5709	10.5709	10.5709	10.5709
96h	21.2811	21.2023	35.4247	36.9097		14.1436	14.2224	15.6286	15.7074									4.33857	4.41737	5.82355	5.90235		0.0494265	0.0467991	0.0176578	0.0167192		0.0326507	0.0178905
ck_96h	21.3449	21.5277	31.1836	31.2991		9.83874	9.65597	9.95415	9.77139		9.80506		9.80506	9.80506	9.80506	9.80506
144h	22.9734	22.9772	32.9091	32.897		9.93565	9.93193	9.9236	9.91989									-0.294665	-0.29838	-0.306712	-0.310427		1.2266	1.22976	1.23689	1.24007		1.23333	0.00622247
ck_144h	22.815	23.2971	33.2636	33.3091		10.4486	9.96647	10.4942	10.012		10.2303		10.2303	10.2303	10.2303	10.2303
Time	Ta2291		TaGRF4-4A			△Ct					Average(△Ct)		Average(△Ct)					△△Ct					2^-△△Ct					Average(2^-△△Ct)	Stdeva
2h	24.2724	24.0238	35.6237	35.9932		11.3513	11.5999	11.7208	11.9694									-2.22367	-1.97507	-1.85416	-1.60556		4.67081	3.93147	3.61542	3.04314		3.81521	0.678622
ck_2h	25.7145	25.6488	39.3698	39.1435		13.6553	13.7209	13.429	13.4947		13.575		13.575	13.575	13.575	13.575		0.0803138	0.145944	-0.145944	-0.0803138		0.945852	0.903788	1.10645	1.05725		1.00334	0.0944356
4h	24.0932	23.8923	36.6019	36.2987		12.5088	12.7097	12.2055	12.4064									-1.06618	-0.865308	-1.36946	-1.16858		2.09388	1.82173	2.58373	2.24791		2.18681	0.31791
ck_4h	25.7145	25.6488	39.3698	39.1435		13.6553	13.7209	13.429	13.4947		13.575		13.575	13.575	13.575	13.575
8h	23.975	24.2549	36.1873	36.1735		12.2124	11.9324	12.1985	11.9186									0.456354	0.176402	0.442498	0.162546		0.728826	0.884907	0.735859	0.893447		0.81076	0.0906611
ck_8h	24.3454	24.2551	35.703	36.4096		11.3576	11.4479	12.0641	12.1545		11.756		11.756	11.756	11.756	11.756
12h	24.0053	24.4054	37.639	36.6481		13.6337	13.2336	12.6428	12.2427									2.2145	1.81442	1.22365	0.823574		0.215461	0.284319	0.428197	0.56504		0.373254	0.155573
ck_12h	24.1347	24.0286	35.3818	35.6198		11.2471	11.3532	11.4851	11.5912		11.4192		11.4192	11.4192	11.4192	11.4192
24h	23.5451	23.562	36.631	36.0071		13.0859	13.069	12.462	12.4451									0.344028	0.327144	-0.279796	-0.296681		0.787838	0.797113	1.21402	1.22832		1.00682	0.247604
ck_24h	23.5099	23.6765	36.1629	36.5072		12.653	12.4864	12.9973	12.8307		12.7418		12.7418	12.7418	12.7418	12.7418
96h	21.2811	21.2023	32.3497	32.3424		11.0686	11.1474	11.0613	11.1401									-3.29312	-3.21431	-3.30042	-3.22161		9.80228	9.28122	9.85199	9.32829		9.56594	0.302891
ck_96h	21.3449	21.5277	35.3263	36.2697		13.9814	13.7986	14.9248	14.742		14.3617		14.3617	14.3617	14.3617	14.3617
144h	22.9734	22.9772	36.3534	36.6679		13.3799	13.3762	13.6944	13.6907									-0.753592	-0.757307	-0.439122	-0.442837		1.68599	1.69033	1.35578	1.35927		1.52284	0.190904
ck_144h	22.815	23.2971	37.0045	37.3747		14.1895	13.7074	14.5597	14.0776		14.1335		14.1335	14.1335	14.1335	14.1335
Time	Ta2291		TaGRF4-4D			△Ct					Average(△Ct)		Average(△Ct)					△△Ct					2^-△△Ct					Average(2^-△△Ct)	Stdeva
2h	24.1147	23.8832	32.2037	32.1963		8.08896	8.32045	8.08155	8.31304									-0.804271	-0.572782	-0.811682	-0.580193		1.74626	1.48739	1.75526	1.49505		1.62099	0.149924
ck_2h	24.2053	24.489	33.123	33.3578		8.91773	8.63394	9.15252	8.86873		8.89323		8.89323	8.89323	8.89323	8.89323		0.0244985	-0.259286	0.259286	-0.0244985		0.983162	1.19689	0.835501	1.01713		1.00817	0.148475
4h	23.9235	24.1483	32.2904	32.2454		8.36683	8.14206	8.32186	8.09708									-0.526394	-0.751169	-0.57137	-0.796145		1.44032	1.68316	1.48593	1.73646		1.58647	0.14527
ck_4h	24.2053	24.489	33.123	33.3578		8.91773	8.63394	9.15252	8.86873		8.89323		8.89323	8.89323	8.89323	8.89323
8h	24.1512	24.2368	33.5291	33.1646		9.3779	9.29229	9.0134	8.92779									1.48659	1.40098	1.1221	1.03649		0.356854	0.378671	0.459426	0.487513		0.420616	0.0627335
ck_8h	25.8069	25.574	33.4817	33.6819		7.67476	7.90765	7.87497	8.10786		7.89131		7.89131	7.89131	7.89131	7.89131
12h	24.6334	24.5576	32.9148	32.823		8.28145	8.35724	8.18965	8.26544									-0.0202494	0.0555452	-0.112049	-0.0362543		1.01413	0.962231	1.08076	1.02545		1.02064	0.04862
ck_12h	24.1474	24.1772	32.3955	32.5325		8.24812	8.21833	8.38507	8.35528		8.3017		8.3017	8.3017	8.3017	8.3017
24h	23.9359	24.2163	33.2288	33.3905		9.29289	9.01249	9.45465	9.17425									-0.384635	-0.665033	-0.222876	-0.503274		1.30553	1.5856	1.16706	1.41743		1.3689	0.17708
ck_24h	24.4413	24.4879	34.1946	34.0896		9.75335	9.70672	9.64833	9.6017		9.67752		9.67752	9.67752	9.67752	9.67752
96h	23.434	23.2568	29.1671	29.1916		5.73306	5.91027	5.75757	5.93477									-3.72631	-3.5491	-3.7018	-3.5246		13.2352	11.7054	13.0123	11.5083		12.3653	0.884165
ck_96h	22.2336	22.3799	31.6527	31.8796		9.4191	9.27274	9.646	9.49965		9.45937		9.45937	9.45937	9.45937	9.45937
144h	23.1138	23.2568	32.3594	32.367		9.24552	9.10251	9.25317	9.11017									-1.12867	-1.27168	-1.12102	-1.26403		2.18658	2.41443	2.17501	2.40165		2.29442	0.13139
ck_144h	22.5779	22.6408	32.8457	33.1214		10.2678	10.2049	10.5435	10.4806		10.3742		10.3742	10.3742	10.3742	10.3742
Time	Ta2291		TaGRF5-4A			△Ct					Average(△Ct)		Average(△Ct)					△△Ct					2^-△△Ct					Average(2^-△△Ct)	Stdeva
2h	24.2724	24.0238	33.9019	33.8352		9.62952	9.87813	9.5628	9.81141									0.78822	1.03683	0.721495	0.970102		0.579058	0.487398	0.606468	0.51047		0.545849	0.056112
ck_2h	25.7145	25.6488	34.5438	34.5021		8.82935	8.89498	8.78763	8.85326		8.8413		8.8413	8.8413	8.8413	8.8413		-0.011958	0.0536724	-0.0536724	0.011958		1.00832	0.963481	1.0379	0.991746		1.00036	0.03113
4h	24.0932	23.8923	33.8945	33.9047		9.80131	10.0022	9.81157	10.0124									0.960001	1.16087	0.970264	1.17114		0.514057	0.447242	0.510413	0.444071		0.478946	0.0384894
ck_4h	25.7145	25.6488	34.5438	34.5021		8.82935	8.89498	8.78763	8.85326		8.8413		8.8413	8.8413	8.8413	8.8413
8h	23.975	24.2549	33.2872	33.4283		9.31221	9.03225	9.45337	9.17342									-0.737491	-1.01744	-0.596328	-0.87628		1.66727	2.02433	1.51186	1.83564		1.75978	0.220424
ck_8h	24.3454	24.2551	34.462	34.2379		10.1166	10.2069	9.89245	9.98282		10.0497		10.0497	10.0497	10.0497	10.0497
12h	24.0053	24.4054	33.3267	33.3452		9.32134	8.92126	9.33991	8.93983									0.00820341	-0.391876	0.0267677	-0.373312		0.99433	1.3121	0.981617	1.29532		1.14584	0.182493
ck_12h	24.1347	24.0286	33.5787	33.2109		9.44396	9.55011	9.07617	9.18232		9.31314		9.31314	9.31314	9.31314	9.31314
24h	23.5451	23.562	34.0961	34.3091		10.551	10.5341	10.764	10.7471									0.912232	0.895348	1.12523	1.10834		0.531362	0.537618	0.45843	0.463827		0.497809	0.0424895
ck_24h	23.5099	23.6765	33.2278	33.2362		9.71791	9.55132	9.72628	9.55969		9.6388		9.6388	9.6388	9.6388	9.6388
96h	21.2811	21.2023	31.4853	31.6859		10.2041	10.2829	10.4048	10.4836									-1.54829	-1.46949	-1.34768	-1.26887		2.92471	2.76924	2.54502	2.40974		2.66218	0.229376
ck_96h	21.3449	21.5277	33.2805	33.0969		11.9356	11.7529	11.752	11.5692		11.7524		11.7524	11.7524	11.7524	11.7524
144h	22.9734	22.9772	33.2845	33.0754		10.3111	10.3074	10.1019	10.0982									0.0469219	0.0432065	-0.162241	-0.165956		0.967999	0.970496	1.11902	1.12191		1.04486	0.0873203
ck_144h	22.815	23.2971	33.2146	33.4258		10.3996	9.9175	10.6108	10.1287		10.2641		10.2641	10.2641	10.2641	10.2641
Time	Ta2291		TaGRF6-4A			△Ct					Average(△Ct)		Average(△Ct)					△△Ct					2^-△△Ct					Average(2^-△△Ct)	Stdeva
2h	24.1147	23.8832	36.7896	36.5568		12.6749	12.9064	12.442	12.6735									0.731839	0.963328	0.498959	0.730448		0.602136	0.512872	0.707617	0.602717		0.606336	0.0796327
ck_2h	24.2053	24.489	36.2684	36.312		12.0631	11.7794	12.1068	11.823		11.9431		11.9431	11.9431	11.9431	11.9431		0.120074	-0.163711	0.163711	-0.120074		0.92014	1.12016	0.892726	1.08679		1.00496	0.115122
4h	23.9235	24.1483	35.7011	36.1677		11.7776	11.5528	12.2442	12.0194									-0.165514	-0.390289	0.301091	0.0763158		1.12157	1.31066	0.811638	0.948477		1.04808	0.216157
ck_4h	24.2053	24.489	36.2684	36.312		12.0631	11.7794	12.1068	11.823		11.9431		11.9431	11.9431	11.9431	11.9431
8h	24.1512	24.2368	36.3044	36.606		12.1532	12.0676	12.4548	12.3692									1.56584	1.48023	1.86745	1.78184		0.337782	0.358433	0.274057	0.290812		0.315271	0.0394398
ck_8h	25.8069	25.574	36.3915	36.1642		10.5846	10.8174	10.3573	10.5902		10.5874		10.5874	10.5874	10.5874	10.5874
12h	24.6334	24.5576	35.9887	36.306		11.3553	11.4311	11.6726	11.7484									-0.786081	-0.710286	-0.468771	-0.392976		1.72438	1.63613	1.38393	1.3131		1.51439	0.197024
ck_12h	24.1474	24.1772	36.1191	36.4882		11.9717	11.9419	12.3408	12.311		12.1414		12.1414	12.1414	12.1414	12.1414
24h	23.9359	24.2163	35.2311	35.6128		11.2952	11.0148	11.6768	11.3965									0.498365	0.217967	0.88005	0.599652		0.707909	0.859776	0.543349	0.659913		0.692737	0.131055
ck_24h	24.4413	24.4879	35.4989	35.0239		11.0576	11.011	10.5826	10.536		10.7968		10.7968	10.7968	10.7968	10.7968
96h	23.434	23.2568	35.168	35.189		11.734	11.9112	11.755	11.9322									-1.21498	-1.03778	-1.19399	-1.01679		2.32138	2.05307	2.28785	2.02341		2.17143	0.154874
ck_96h	22.2336	22.3799	35.4061	35.1053		13.1725	13.0261	12.8718	12.7254		12.949		12.949	12.949	12.949	12.949
144h	23.1138	23.2568	35.3797	35.1837		12.2658	12.1228	12.0699	11.9269									0.767676	0.62467	0.571737	0.428731		0.587363	0.648568	0.672806	0.742915		0.662913	0.0643216
ck_144h	22.5779	22.6408	34.0122	34.2028		11.4343	11.3714	11.6249	11.562		11.4982		11.4982	11.4982	11.4982	11.4982
Time	Ta2291		TaGRF9-6D			△Ct					Average(△Ct)		Average(△Ct)					△△Ct					2^-△△Ct					Average(2^-△△Ct)	Stdeva
2h	22.4031	22.7849	31.4509	31.3906		9.0478	8.66601	8.98759	8.60579									1.25767	0.87587	1.19746	0.815658		0.418219	0.544925	0.436044	0.568149		0.491834	0.0756624
ck_2h	23.501	23.2003	31.1725	31.1091		7.67144	7.9722	7.60807	7.90883		7.79014		7.79014	7.79014	7.79014	7.79014		-0.118691	0.182068	-0.182068	0.118691		1.08575	0.881439	1.13451	0.921023		1.00568	0.123303
4h	23.8326	23.601	30.5788	30.6943		6.74621	6.97783	6.86163	7.09325									-1.04392	-0.812304	-0.928503	-0.696884		2.06183	1.75601	1.9033	1.621		1.83554	0.189867
ck_4h	23.501	23.2003	31.1725	31.1091		7.67144	7.9722	7.60807	7.90883		7.79014		7.79014	7.79014	7.79014	7.79014
8h	24.7149	24.6059	31.2531	31.1711		6.5382	6.64716	6.45625	6.56521									-1.24617	-1.13721	-1.32812	-1.21916		2.37212	2.19955	2.51076	2.32811		2.35264	0.128346
ck_8h	25.4771	25.1414	33.1635	33.0237		7.68639	8.02215	7.54659	7.88235		7.78437		7.78437	7.78437	7.78437	7.78437
12h	23.2852	23.5726	32.0106	32.2035		8.72545	8.43801	8.91831	8.63087									0.184434	-0.103008	0.377291	0.0898489		0.879994	1.07401	0.769882	0.939621		0.915877	0.126718
ck_12h	23.3562	23.2433	31.985	31.6966		8.62881	8.74164	8.34041	8.45323		8.54102		8.54102	8.54102	8.54102	8.54102
24h	23.4581	23.5951	32.0118	32.0045		8.55369	8.41669	8.54639	8.40938									0.0785307	-0.0584767	0.071227	-0.0657805		0.947022	1.04137	0.951828	1.04665		0.996717	0.0546856
ck_24h	23.1693	23.3934	32.0106	31.5024		8.84131	8.61713	8.3332	8.10901		8.47516		8.47516	8.47516	8.47516	8.47516
96h	21.5725	21.5561	32.1998	32.2288		10.6273	10.6437	10.6563	10.6727									4.4695	4.48587	4.49847	4.51484		0.0451384	0.0446291	0.0442411	0.043742		0.0444376	0.000591706
ck_96h	23.6269	23.6218	29.5397	30.0247		5.91273	5.91791	6.39774	6.40292		6.15783		6.15783	6.15783	6.15783	6.15783
144h	22.3592	22.2865	31.2896	31.4575		8.9304	9.00311	9.0983	9.17101									1.10383	1.17654	1.27173	1.34444		0.465278	0.44241	0.414163	0.393807		0.428914	0.0313826
ck_144h	23.1267	23.1196	30.8459	31.0535		7.71918	7.72629	7.92684	7.93396		7.82657		7.82657	7.82657	7.82657	7.82657
Time	Ta2291		TaGRF10-6A			△Ct					Average(△Ct)		Average(△Ct)					△△Ct					2^-△△Ct					Average(2^-△△Ct)	Stdeva
2h	24.1147	23.8832	34.7392	34.9531		10.6245	10.856	10.8383	11.0698									0.406373	0.637862	0.620208	0.851697		0.754518	0.642664	0.650577	0.554133		0.650473	0.0819914
ck_2h	24.2053	24.489	34.5931	34.5375		10.3878	10.1041	10.3322	10.0484		10.2181		10.2181	10.2181	10.2181	10.2181		0.169701	-0.114084	0.114084	-0.169701		0.889027	1.08229	0.923969	1.12483		1.00503	0.11597
4h	23.9235	24.1483	34.0943	34.1027		10.1708	9.94599	10.1791	9.95434									-0.0473773	-0.272153	-0.0390235	-0.263799		1.03338	1.20761	1.02742	1.20064		1.11726	0.100368
ck_4h	24.2053	24.489	34.5931	34.5375		10.3878	10.1041	10.3322	10.0484		10.2181		10.2181	10.2181	10.2181	10.2181
8h	24.1512	24.2368	34.7203	34.5626		10.5691	10.4835	10.4114	10.3258									1.97929	1.89368	1.82158	1.73597		0.253615	0.26912	0.282911	0.300207		0.276463	0.0198437
ck_8h	25.8069	25.574	34.2309	34.3296		8.42402	8.65691	8.52273	8.75562		8.58982		8.58982	8.58982	8.58982	8.58982
12h	24.6334	24.5576	33.6049	33.7767		8.97149	9.04728	9.14334	9.21914									-1.02695	-0.951157	-0.855098	-0.779303		2.03771	1.93342	1.80888	1.7163		1.87408	0.140763
ck_12h	24.1474	24.1772	33.9181	34.4034		9.77072	9.74093	10.256	10.2262		9.99844		9.99844	9.99844	9.99844	9.99844
24h	23.9359	24.2163	34.2208	34.376		10.2849	10.0045	10.4401	10.1597									0.921901	0.641503	1.07709	0.796697		0.527813	0.641045	0.473982	0.575666		0.554626	0.071024
ck_24h	24.4413	24.4879	33.7076	33.9476		9.26633	9.2197	9.50627	9.45964		9.36299		9.36299	9.36299	9.36299	9.36299
96h	23.434	23.2568	31.4864	31.2869		8.05242	8.22962	7.85292	8.03013									-3.62457	-3.44737	-3.82407	-3.64686		12.334	10.9084	14.1631	12.5261		12.4829	1.33245
ck_96h	22.2336	22.3799	34.1503	33.8172		11.9167	11.7704	11.5836	11.4373		11.677		11.677	11.677	11.677	11.677
144h	23.1138	23.2568	34.0212	33.8746		10.9074	10.7644	10.7608	10.6178									-0.755579	-0.898586	-0.902149	-1.04516		1.68831	1.86424	1.86885	2.06359		1.87125	0.153315
ck_144h	22.5779	22.6408	34.2193	34.3253		11.6414	11.5785	11.7474	11.6845		11.6629		11.6629	11.6629	11.6629	11.6629
Time	Ta2291		TaGRF10-6B			△Ct					Average(△Ct)		Average(△Ct)					△△Ct					2^-△△Ct					Average(2^-△△Ct)	Stdeva
2h	22.4031	22.7849	34.0429	34.1131		11.6399	11.2581	11.7101	11.3283									-0.321025	-0.702823	-0.250823	-0.632621		1.24922	1.62769	1.18989	1.55038		1.40429	0.216998
ck_2h	23.501	23.2003	35.1372	35.4858		11.6362	11.937	11.9848	12.2856		11.9609		11.9609	11.9609	11.9609	11.9609		-0.324693	-0.0239341	0.0239341	0.324693		1.2524	1.01673	0.983547	0.798468		1.01279	0.186384
4h	23.8326	23.601	34.8134	33.9302		10.9808	11.2124	10.0976	10.3292									-0.980074	-0.748455	-1.86328	-1.63166		1.97257	1.67999	3.63834	3.0987		2.5974	0.925008
ck_4h	23.501	23.2003	35.1372	35.4858		11.6362	11.937	11.9848	12.2856		11.9609		11.9609	11.9609	11.9609	11.9609
8h	24.7149	24.6059	35.0648	35.4269		10.35	10.459	10.7121	10.8211									0.00350474	0.112468	0.365601	0.474564		0.997574	0.925004	0.776146	0.719684		0.854602	0.128784
ck_8h	25.4771	25.1414	36.3207	34.9908		10.8436	11.1793	9.51366	9.84941		10.3465		10.3465	10.3465	10.3465	10.3465
12h	23.2852	23.5726	36.1376	36.0747		12.8524	12.565	12.7896	12.5021									1.3359	1.04846	1.27305	0.985604		0.396146	0.483486	0.413785	0.505014		0.449608	0.0527859
ck_12h	23.3562	23.2433	34.9125	34.7201		11.5563	11.6692	11.3639	11.4767		11.5165		11.5165	11.5165	11.5165	11.5165
24h	23.4581	23.5951	36.9904	36.8771		13.5323	13.3953	13.419	13.282									0.894533	0.757526	0.781191	0.644183		0.537921	0.59151	0.581886	0.639855		0.587793	0.0418184
ck_24h	23.1693	23.3934	35.5705	36.2678		12.4013	12.1771	13.0985	12.8743		12.6378		12.6378	12.6378	12.6378	12.6378
96h	21.5725	21.5561	31.0693	31.2065		9.49678	9.51315	9.63402	9.65039									-3.30481	-3.28844	-3.16757	-3.1512		9.88207	9.77058	8.98531	8.88393		9.38047	0.518487
ck_96h	23.6269	23.6218	36.7889	36.063		13.162	13.1671	12.436	12.4412		12.8016		12.8016	12.8016	12.8016	12.8016
144h	22.3592	22.2865	35.606	35.0788		13.2469	13.3196	12.7196	12.7923									0.167889	0.240599	-0.359371	-0.286661		0.890144	0.846394	1.28287	1.21981		1.0598	0.223374
ck_144h	23.1267	23.1196	35.984	36.4202		12.8573	12.8645	13.2935	13.3006		13.079		13.079	13.079	13.079	13.079
Time	Ta2291		TaGRF10-6D			△Ct					Average(△Ct)		Average(△Ct)					△△Ct					2^-△△Ct					Average(2^-△△Ct)	Stdeva
2h	22.4031	22.7849	33.931	33.9082		11.528	11.1462	11.5051	11.1233									-0.605334	-0.987132	-0.628208	-1.01001		1.52133	1.98224	1.54564	2.01392		1.76578	0.268728
ck_2h	23.501	23.2003	35.3784	35.5895		11.8774	12.1781	12.0885	12.3893		12.1333		12.1333	12.1333	12.1333	12.1333		-0.255938	0.044821	-0.044821	0.255938		1.19411	0.96941	1.03156	0.837442		1.00813	0.148067
4h	23.8326	23.601	35.2574	35.3639		11.4248	11.6564	11.5313	11.7629									-0.708514	-0.476895	-0.602047	-0.370428		1.63412	1.39175	1.51787	1.29274		1.45912	0.14866
ck_4h	23.501	23.2003	35.3784	35.5895		11.8774	12.1781	12.0885	12.3893		12.1333		12.1333	12.1333	12.1333	12.1333
8h	24.7149	24.6059	35.6815	35.2196		10.9666	11.0756	10.5048	10.6138									2.18806	2.29702	1.72626	1.83522		0.219446	0.203483	0.302235	0.280249		0.251353	0.0473764
ck_8h	25.4771	25.1414	34.1557	34.0199		8.67852	9.01427	8.5428	8.87856		8.77854		8.77854	8.77854	8.77854	8.77854
12h	23.2852	23.5726	35.1871	35.2544		11.9019	11.6145	11.9692	11.6818									0.258057	-0.0293854	0.325336	0.0378939		0.836214	1.02058	0.798112	0.974076		0.907245	0.106874
ck_12h	23.3562	23.2433	34.8141	35.0731		11.458	11.5708	11.7169	11.8298		11.6439		11.6439	11.6439	11.6439	11.6439
24h	23.4581	23.5951	35.0294	35.3698		11.5713	11.4343	11.9117	11.7747									0.334921	0.197913	0.675298	0.53829		0.792828	0.871811	0.626203	0.688586		0.744857	0.109031
ck_24h	23.1693	23.3934	34.3526	34.6828		11.1834	10.9592	11.5136	11.2894		11.2364		11.2364	11.2364	11.2364	11.2364
96h	21.5725	21.5561	30.8746	31.2732		9.30214	9.31851	9.70066	9.71703									-1.19859	-1.18222	-0.80006	-0.78369		2.29514	2.26925	1.74117	1.72153		2.00677	0.318308
ck_96h	23.6269	23.6218	34.1349	34.1152		10.508	10.5132	10.4883	10.4935		10.5007		10.5007	10.5007	10.5007	10.5007
144h	22.3592	22.2865	33.6986	34.1373		11.3395	11.4122	11.7781	11.8508									0.137143	0.209853	0.57582	0.64853		0.909318	0.864625	0.670905	0.63793		0.770694	0.136166
ck_144h	23.1267	23.1196	34.116	34.5348		10.9894	10.9965	11.4082	11.4153		11.2023		11.2023	11.2023	11.2023	11.2023
Time	Ta2291		TaGRF11-7A			△Ct					Average(△Ct)		Average(△Ct)					△△Ct					2^-△△Ct					Average(2^-△△Ct)	Stdeva
2h	23.5265	23.4972	30.3824	30.3839		6.85594	6.88518	6.8574	6.88664									0.27826	0.307494	0.279716	0.308951		0.824585	0.808044	0.823753	0.807229		0.815903	0.009557
ck_2h	25.0886	25.0019	31.6234	31.6225		6.53478	6.62145	6.53392	6.62059		6.57768		6.57768	6.57768	6.57768	6.57768		-0.0429088	0.0437684	-0.0437684	0.0429088		1.03019	0.970118	1.0308	0.970696		1.00045	0.0346942
4h	24.273	24.2965	30.4038	30.4264		6.13083	6.10733	6.1534	6.1299									-0.446858	-0.470359	-0.42428	-0.447781		1.36307	1.38545	1.3419	1.36394		1.36359	0.0177836
ck_4h	25.0886	25.0019	31.6234	31.6225		6.53478	6.62145	6.53392	6.62059		6.57768		6.57768	6.57768	6.57768	6.57768
8h	24.1776	24.1411	30.8495	30.9932		6.67187	6.70839	6.81559	6.85211									1.39371	1.43023	1.53744	1.57396		0.380584	0.371071	0.344496	0.335885		0.358009	0.0212314
ck_8h	25.4213	25.4523	30.7664	30.6636		5.34505	5.31407	5.24224	5.21126		5.27815		5.27815	5.27815	5.27815	5.27815
12h	24.2518	24.2954	30.0382	30.2101		5.78642	5.74282	5.95828	5.91469									-0.312152	-0.355748	-0.140283	-0.183879		1.24156	1.27965	1.10212	1.13593		1.18982	0.0843423
ck_12h	24.2466	24.26	30.2533	30.4504		6.00676	5.99332	6.20382	6.19037		6.09857		6.09857	6.09857	6.09857	6.09857
24h	23.9015	23.8434	31.476	31.3116		7.57444	7.63253	7.4101	7.46819									0.337865	0.395961	0.173523	0.231619		0.791211	0.759983	0.886675	0.851679		0.822387	0.0573211
ck_24h	24.1331	24.2257	31.4258	31.4061		7.29271	7.20017	7.27298	7.18044		7.23657		7.23657	7.23657	7.23657	7.23657
96h	22.0866	22.0437	29.0054	29.2656		6.91881	6.96168	7.17907	7.22194									0.501663	0.544536	0.761923	0.804796		0.706292	0.685612	0.58971	0.572443		0.638514	0.0672293
ck_96h	23.0085	23.1757	29.5101	29.5084		6.50156	6.33439	6.49991	6.33274		6.41715		6.41715	6.41715	6.41715	6.41715
144h	23.0349	23.1957	31.481	31.2129		8.44612	8.28535	8.17799	8.01721									0.447296	0.28652	0.179165	0.0183879		0.733416	0.819878	0.883214	0.987335		0.855961	0.10696
ck_144h	22.1666	21.9999	30.0725	30.0917		7.90594	8.07261	7.92504	8.09171		7.99883		7.99883	7.99883	7.99883	7.99883
Time	Ta2291		TaGRF11-7D			△Ct					Average(△Ct)		Average(△Ct)					△△Ct					2^-△△Ct					Average(2^-△△Ct)	Stdeva
2h	23.5265	23.4972	31.2225	31.2364		7.696	7.72523	7.70997	7.7392									0.0461576	0.0753921	0.0601286	0.089363		0.968512	0.949084	0.959179	0.939938		0.954178	0.0123722
ck_2h	25.0886	25.0019	32.6785	32.7117		7.58987	7.67655	7.62313	7.7098		7.64984		7.64984	7.64984	7.64984	7.64984		-0.0599657	0.0267115	-0.0267115	0.0599657		1.04244	0.981655	1.01869	0.959287		1.00052	0.0371639
4h	24.273	24.2965	31.4631	31.6757		7.19014	7.16664	7.40267	7.37917									-0.459699	-0.4832	-0.247172	-0.270673		1.37525	1.39784	1.18688	1.20637		1.29159	0.110326
ck_4h	25.0886	25.0019	32.6785	32.7117		7.58987	7.67655	7.62313	7.7098		7.64984		7.64984	7.64984	7.64984	7.64984
8h	24.1776	24.1411	32.4238	32.1696		8.24612	8.28264	7.99196	8.02848									1.47962	1.51614	1.22546	1.26198		0.358582	0.349619	0.427661	0.416971		0.388208	0.0397937
ck_8h	25.4213	25.4523	32.2482	32.1584		6.82689	6.7959	6.73709	6.70611		6.7665		6.7665	6.7665	6.7665	6.7665
12h	24.2518	24.2954	31.9389	32.0574		7.68709	7.6435	7.8056	7.762									0.573061	0.529465	0.691568	0.647972		0.672189	0.692812	0.61918	0.638177		0.65559	0.0331153
ck_12h	24.2466	24.26	31.5167	31.218		7.2701	7.25665	6.97141	6.95797		7.11403		7.11403	7.11403	7.11403	7.11403
24h	23.9015	23.8434	32.7579	32.5775		8.8564	8.9145	8.67598	8.73408									0.339256	0.397352	0.158838	0.216934		0.790449	0.75925	0.895746	0.860392		0.826459	0.0626256
ck_24h	24.1331	24.2257	32.839	32.5541		8.70586	8.61332	8.42096	8.32843		8.51714		8.51714	8.51714	8.51714	8.51714
96h	22.0866	22.0437	30.2296	30.1177		8.14305	8.18593	8.03117	8.07405									1.10378	1.14665	0.991897	1.03477		0.465297	0.451673	0.502816	0.488094		0.47697	0.0228618
ck_96h	23.0085	23.1757	30.0824	30.1804		7.07385	6.90668	7.17187	7.0047		7.03928		7.03928	7.03928	7.03928	7.03928
144h	23.0349	23.1957	31.8288	32.737		8.79392	8.63315	9.70212	9.54134									0.0909226	-0.0698544	0.999122	0.838345		0.938922	1.04961	0.500305	0.559285		0.762031	0.273007
ck_144h	22.1666	21.9999	30.8088	30.7638		8.64216	8.80883	8.59717	8.76384		8.703		8.703	8.703	8.703	8.703

## Sheet: Mannitol Leaf
Mannitol Leaf
Time	Ta2291		TaGRF1-2B			△Ct					Average(△Ct)		Average(△Ct)					△△Ct					2^-△△Ct					Average(2^-△△Ct)	Stdeva
2h	22.0712	22.5036	27.2668	27.2326		5.19554	4.76315	5.16136	4.72897									5.42162	4.98923	5.38744	4.95505		0.0233308	0.0314841	0.0238902	0.0322389		0.027736	0.00477912
ck_2h	26.7199	26.7119	26.5384	26.4412		-0.181478	-0.173449	-0.278712	-0.270683		-0.226081		-0.226081	-0.226081	-0.226081	-0.226081		0.0446024	0.0526313	-0.0526313	-0.0446024		0.969557	0.964176	1.03715	1.0314		1.00057	0.0390521
4h	22.1015	22.0208	27.3259	27.6407		5.2244	5.3051	5.53917	5.61987									2.76477	2.84548	3.07954	3.16025		0.147136	0.139131	0.118295	0.111859		0.129105	0.0167328
ck_4h	23.5392	23.73	26.2066	25.9819		2.6674	2.47657	2.44268	2.25185		2.45962		2.45962	2.45962	2.45962	2.45962
8h	22.918	23.1199	26.1502	26.5524		3.23218	3.03032	3.63434	3.43248									0.608016	0.406165	1.01018	0.808325		0.656098	0.754627	0.496485	0.571044		0.619564	0.111174
ck_8h	23.6376	23.1176	25.7216	26.2819		2.08402	2.60397	2.64435	3.1643		2.62416		2.62416	2.62416	2.62416	2.62416
12h	22.1041	22.0985	26.4296	26.4253		4.32556	4.33116	4.32129	4.32689									-1.04384	-1.03823	-1.04811	-1.0425		2.0617	2.05371	2.06781	2.0598		2.06076	0.00580995
ck_12h	21.056	21.4	26.3429	26.8518		5.28692	4.94291	5.79588	5.45187		5.3694		5.3694	5.3694	5.3694	5.3694
24h	21.3999	20.9325	26.0028	26.2132		4.60287	5.0703	4.81329	5.28072									-0.606968	-0.139536	-0.396548	0.0708842		1.52305	1.10155	1.31635	0.952054		1.22325	0.249606
ck_24h	21.2116	21.7598	26.6064	26.7846		5.39482	4.84662	5.57306	5.02486		5.20984		5.20984	5.20984	5.20984	5.20984
96h	23.9017	23.7441	28.879	28.6075		4.97722	5.13487	4.70581	4.86347									-1.64298	-1.48533	-1.91439	-1.75673		3.1231	2.7998	3.76954	3.37932		3.26794	0.409933
ck_96h	21.6797	22.0272	29.0215	27.9257		7.34185	6.99434	6.24606	5.89855		6.6202		6.6202	6.6202	6.6202	6.6202
144h	21.5046	21.6209	24.4422	24.6572		2.93754	2.82123	3.15255	3.03624									-1.38995	-1.50626	-1.17494	-1.29124		2.6207	2.84072	2.25783	2.44739		2.54166	0.248416
ck_144h	20.7692	21.3282	25.4263	25.326		4.65715	4.09813	4.55684	3.99782		4.32748		4.32748	4.32748	4.32748	4.32748
Time	Ta2291		TaGRF1-2D			△Ct					Average(△Ct)		Average(△Ct)					△△Ct					2^-△△Ct					Average(2^-△△Ct)	Stdeva
2h	22.0712	22.5036	25.6812	25.5878		3.60996	3.17758	3.51657	3.08418									1.82554	1.39316	1.73215	1.29976		0.282135	0.380731	0.301004	0.406193		0.342516	0.0602335
ck_2h	26.7199	26.7119	28.4893	28.5112		1.76947	1.7775	1.79134	1.79937		1.78442		1.78442	1.78442	1.78442	1.78442		-0.0149533	-0.0069244	0.0069244	0.0149533		1.01042	1.00481	0.995212	0.989689		1.00003	0.00932636
4h	22.1015	22.0208	24.7429	27.0992		2.64145	2.72215	4.99767	5.07838									0.77697	0.857676	3.1332	3.2139		0.583591	0.551841	0.113976	0.107775		0.339296	0.264087
ck_4h	23.5392	23.73	25.6898	25.3084		2.15059	1.95976	1.7692	1.57837		1.86448		1.86448	1.86448	1.86448	1.86448
8h	22.918	23.1199	24.9941	25.0689		2.07605	1.8742	2.15084	1.94899									-0.00832625	-0.210178	0.0664659	-0.135386		1.00579	1.15683	0.954975	1.09839		1.054	0.0906915
ck_8h	23.6376	23.1176	25.0321	25.8918		1.39451	1.91446	2.25429	2.77424		2.08438		2.08438	2.08438	2.08438	2.08438
12h	22.1041	22.0985	23.803	24.0084		1.69893	1.70453	1.90439	1.90999									-1.26595	-1.26035	-1.0605	-1.0549		2.40486	2.39554	2.08565	2.07757		2.24091	0.184008
ck_12h	21.056	21.4	24.1211	24.2646		3.06511	2.7211	3.20867	2.86465		2.96488		2.96488	2.96488	2.96488	2.96488
24h	21.3999	20.9325	26.2043	26.5607		4.80435	5.27178	5.16073	5.62817									0.471095	0.938527	0.827479	1.29491		0.721417	0.521765	0.563513	0.407561		0.553564	0.129874
ck_24h	21.2116	21.7598	25.5063	26.1316		4.29468	3.74648	4.92003	4.37183		4.33325		4.33325	4.33325	4.33325	4.33325
96h	23.9017	23.7441	26.2411	26.3608		2.33937	2.49702	2.45906	2.61672									-2.02138	-1.86373	-1.90169	-1.74403		4.05973	3.63947	3.7365	3.3497		3.69635	0.292719
ck_96h	21.6797	22.0272	26.2577	26.1707		4.57801	4.2305	4.491	4.14349		4.36075		4.36075	4.36075	4.36075	4.36075
144h	21.5046	21.6209	23.9221	23.9014		2.41747	2.30116	2.39677	2.28046									-1.61711	-1.73342	-1.63781	-1.75412		3.06761	3.32515	3.11194	3.3732		3.21948	0.152127
ck_144h	20.7692	21.3282	24.8931	25.2735		4.12391	3.56488	4.50428	3.94526		4.03458		4.03458	4.03458	4.03458	4.03458
Time	Ta2291		TaGRF3-2B			△Ct					Average(△Ct)		Average(△Ct)					△△Ct					2^-△△Ct					Average(2^-△△Ct)	Stdeva
2h	22.0712	22.5036	36.6902	36.5832		14.619	14.1866	14.5119	14.0795									7.04436	6.61198	6.93727	6.50489		0.00757593	0.0102234	0.00815967	0.0110112		0.00924255	0.00163711
ck_2h	26.7199	26.7119	34.218	34.363		7.49809	7.50612	7.64316	7.65119		7.57464		7.57464	7.57464	7.57464	7.57464		-0.07655	-0.068521	0.068521	0.07655		1.05449	1.04864	0.953615	0.948323		1.00127	0.0581697
4h	22.1015	22.0208	40.0267	40.0556		17.9252	18.0059	17.9541	18.0348									6.15397	6.23468	6.18286	6.26356		0.0140433	0.0132793	0.0137649	0.0130161		0.0135259	0.000463902
ck_4h	23.5392	23.73	35.3334	35.4783		11.7942	11.6034	11.9391	11.7483		11.7713		11.7713	11.7713	11.7713	11.7713
8h	22.918	23.1199	34.0305	34.0356		11.1124	10.9106	11.1176	10.9158									-2.27466	-2.47651	-2.26946	-2.47131		4.83883	5.56549	4.82142	5.54547		5.1928	0.418925
ck_8h	23.6376	23.1176	36.089	37.4403		12.4515	12.9714	13.8028	14.3227		13.3871		13.3871	13.3871	13.3871	13.3871
12h	22.1041	22.0985	34.8552	34.493		12.7511	12.7567	12.389	12.3946									-1.30831	-1.3027	-1.67045	-1.66485		2.47651	2.46691	3.18315	3.17081		2.82434	0.407238
ck_12h	21.056	21.4	35.3477	35.2272		14.2917	13.9477	14.1712	13.8272		14.0594		14.0594	14.0594	14.0594	14.0594
24h	21.3999	20.9325	35.6468	35.4248		14.2469	14.7143	14.0248	14.4923									-2.43188	-1.96445	-2.65395	-2.18652		5.39595	3.90263	6.29388	4.55205		5.03613	1.03772
ck_24h	21.2116	21.7598	38.6749	37.654		17.4633	16.9151	16.4424	15.8942		16.6788		16.6788	16.6788	16.6788	16.6788
96h	23.9017	23.7441	37.1322	37.2327		13.2304	13.3881	13.331	13.4887									-1.10864	-0.950989	-1.00808	-0.850431		2.15643	1.9332	2.01124	1.80304		1.97598	0.14781
ck_96h	21.6797	22.0272	36.2839	36.1011		14.6042	14.2567	14.4214	14.0739		14.3391		14.3391	14.3391	14.3391	14.3391
144h	21.5046	21.6209	34.0701	33.5292		12.5654	12.4491	12.0245	11.9082									-0.709811	-0.826117	-1.25069	-1.367		1.63559	1.77291	2.37956	2.57933		2.09185	0.458371
ck_144h	20.7692	21.3282	34.2555	34.3924		13.4863	12.9273	13.6232	13.0641		13.2752		13.2752	13.2752	13.2752	13.2752
Time	Ta2291		TaGRF3-2D			△Ct					Average(△Ct)		Average(△Ct)					△△Ct					2^-△△Ct					Average(2^-△△Ct)	Stdeva
2h	23.9074	23.4428	32.8779	32.8856		8.97052	9.4351	8.97827	9.44284									0.739488	1.20406	0.747233	1.21181		0.598952	0.434051	0.595745	0.431727		0.515119	0.0949648
ck_2h	25.1602	25.2757	33.359	33.539		8.19875	8.08325	8.37882	8.26332		8.23103		8.23103	8.23103	8.23103	8.23103		-0.0322868	-0.147786	0.147786	0.0322868		1.02263	1.10787	0.902635	0.977869		1.00275	0.0858046
4h	25.3218	25.2664	33.3316	33.2947		8.00986	8.06526	7.97293	8.02833									-1.08832	-1.03292	-1.12525	-1.06985		2.12626	2.04616	2.18139	2.09921		2.11326	0.0563015
ck_4h	23.663	23.9724	33.0021	32.8297		9.3391	9.02971	9.16664	8.85725		9.09818		9.09818	9.09818	9.09818	9.09818
8h	23.7496	23.99	33.2998	33.4153		9.5502	9.30983	9.66563	9.42526									0.565818	0.325446	0.681244	0.440872		0.675572	0.798052	0.623627	0.736689		0.708485	0.0755021
ck_8h	25.4123	26.0069	34.79	34.598		9.37769	8.78306	9.18571	8.59107		8.98438		8.98438	8.98438	8.98438	8.98438
12h	25.2026	25.052	31.4005	31.4031		6.1979	6.34849	6.20051	6.35111									-1.79444	-1.64384	-1.79183	-1.64123		3.4688	3.12498	3.46253	3.11932		3.29391	0.198361
ck_12h	26.1048	25.3668	34.1995	33.2567		8.09475	8.83273	7.15195	7.88993		7.99234		7.99234	7.99234	7.99234	7.99234
24h	24.0212	23.79	32.1968	32.1026		8.1756	8.40685	8.08142	8.31266									-1.34561	-1.11437	-1.4398	-1.20855		2.54138	2.165	2.71283	2.31106		2.43257	0.242722
ck_24h	25.7421	25.285	35.0137	35.0559		9.27157	9.72867	9.31376	9.77086		9.52122		9.52122	9.52122	9.52122	9.52122
96h	26.5645	26.4376	35.201	35.4928		8.63645	8.76336	8.9283	9.05521									-0.297776	-0.170863	-0.00592263	0.12099		1.22925	1.12573	1.00411	0.919557		1.06966	0.135941
ck_96h	25.2787	25.542	34.2564	34.4327		8.97769	8.71438	9.15406	8.89075		8.93422		8.93422	8.93422	8.93422	8.93422
144h	23.7791	23.9272	32.4956	32.7694		8.71646	8.56844	8.99024	8.84222									-0.0819829	-0.230004	0.191798	0.0437774		1.05847	1.17284	0.875514	0.970112		1.01923	0.126758
ck_144h	23.9933	23.7885	32.7187	32.66		8.72541	8.93018	8.6667	8.87148		8.79844		8.79844	8.79844	8.79844	8.79844
Time	Ta2291		TaGRF4-4A			△Ct					Average(△Ct)		Average(△Ct)					△△Ct					2^-△△Ct					Average(2^-△△Ct)	Stdeva
2h	23.9074	23.4428	37.5439	37.5878		13.6365	14.1011	13.6805	14.1451									-0.180219	0.284358	-0.13624	0.328337		1.13306	0.821107	1.09904	0.796454		0.962413	0.178227
ck_2h	25.1602	25.2757	39.0604	39.009		13.9002	13.7847	13.8488	13.7333		13.8167		13.8167	13.8167	13.8167	13.8167		0.0834486	-0.0320506	0.0320506	-0.0834486		0.943799	1.02246	0.978029	1.05955		1.00096	0.0506234
4h	25.3218	25.2664	39.6099	39.5918		14.2882	14.3436	14.2701	14.3255									1.13385	1.18925	1.11576	1.17116		0.455697	0.43853	0.461447	0.444063		0.449934	0.0104922
ck_4h	23.663	23.9724	36.9055	37.0386		13.2425	12.9331	13.3755	13.0662		13.1543		13.1543	13.1543	13.1543	13.1543
8h	23.7496	23.99	36.8209	36.8283		13.0713	12.8309	13.0787	12.8383									0.0866847	-0.153687	0.0940873	-0.146285		0.941684	1.11241	0.936865	1.10672		1.02442	0.0983629
ck_8h	25.4123	26.0069	39.1402	38.248		13.728	13.1334	12.8358	12.2412		12.9846		12.9846	12.9846	12.9846	12.9846
12h	25.2026	25.052	38.7165	39.4218		13.5139	13.6645	14.2192	14.3698									1.43835	1.58894	2.14361	2.2942		0.368989	0.332415	0.226313	0.203881		0.2829	0.0802269
ck_12h	26.1048	25.3668	37.8575	37.7651		11.7528	12.4907	11.6604	12.3984		12.0756		12.0756	12.0756	12.0756	12.0756
24h	24.0212	23.79	37.6997	37.4403		13.6784	13.9097	13.4191	13.6504									2.36093	2.59217	2.10159	2.33284		0.194666	0.165836	0.233001	0.198493		0.197999	0.0275131
ck_24h	25.7421	25.285	37.0736	36.5886		11.3315	11.7886	10.8465	11.3036		11.3175		11.3175	11.3175	11.3175	11.3175
96h	26.5645	26.4376	38.5242	38.4458		11.9597	12.0866	11.8813	12.0082									-1.87428	-1.74736	-1.95267	-1.82576		3.66618	3.35745	3.8709	3.54493		3.60986	0.215438
ck_96h	25.2787	25.542	39.2498	39.2388		13.9711	13.7078	13.9601	13.6968		13.834		13.834	13.834	13.834	13.834
144h	23.7791	23.9272	38.1057	38.006		14.3265	14.1785	14.2269	14.0789									0.250406	0.102384	0.150752	0.00273128		0.84066	0.931492	0.900781	0.998109		0.91776	0.0655163
ck_144h	23.9933	23.7885	38.0385	37.8957		14.0452	14.2499	13.9023	14.1071		14.0761		14.0761	14.0761	14.0761	14.0761
Time	Ta2291		TaGRF4-4D			△Ct					Average(△Ct)		Average(△Ct)					△△Ct					2^-△△Ct					Average(2^-△△Ct)	Stdeva
2h	23.1122	23.0686	31.4888	31.4106		8.3766	8.4202	8.29837	8.34197									-0.450469	-0.40687	-0.5287	-0.485101		1.36648	1.32581	1.44263	1.39968		1.38365	0.0495854
ck_2h	23.4412	23.6856	32.3496	32.4312		8.90849	8.66408	8.99006	8.74565		8.82707		8.82707	8.82707	8.82707	8.82707		0.081421	-0.162989	0.162989	-0.081421		0.945126	1.1196	0.893172	1.05806		1.00399	0.103337
4h	24.1177	24.2452	32.0121	32.1902		7.89439	7.76693	8.07247	7.94501									0.0673615	-0.0601012	0.245445	0.117982		0.954382	1.04254	0.843556	0.921476		0.940488	0.0823908
ck_4h	23.2111	23.2377	31.0875	31.0153		7.87642	7.84987	7.80419	7.77764		7.82703		7.82703	7.82703	7.82703	7.82703
8h	22.6179	22.8474	29.9824	30.2155		7.36452	7.135	7.59764	7.36811									-0.0620371	-0.291566	0.171077	-0.0584511		1.04394	1.22397	0.888179	1.04135		1.04936	0.137308
ck_8h	24.7453	24.7119	32.1818	32.1285		7.43649	7.46988	7.38324	7.41663		7.42656		7.42656	7.42656	7.42656	7.42656
12h	23.6987	23.6448	31.2036	31.2959		7.50487	7.5588	7.59715	7.65109									-2.1182	-2.06426	-2.02591	-1.97197		4.34151	4.18219	4.07248	3.92303		4.1298	0.176637
ck_12h	22.1695	22.4204	32.138	31.698		9.96852	9.7176	9.52852	9.2776		9.62306		9.62306	9.62306	9.62306	9.62306
24h	23.2773	23.172	30.9574	30.9407		7.68014	7.7854	7.66347	7.76874									-1.6352	-1.52993	-1.65186	-1.54659		3.10631	2.88772	3.14239	2.92127		3.01442	0.128517
ck_24h	22.3463	22.3068	31.5268	31.757		9.1805	9.21995	9.41072	9.45018		9.31534		9.31534	9.31534	9.31534	9.31534
96h	25.7271	25.8341	32.572	32.5729		6.84492	6.73789	6.84585	6.73881									-1.69015	-1.79718	-1.68922	-1.79626		3.2269	3.4754	3.22483	3.47318		3.35008	0.143433
ck_96h	23.6945	23.7172	32.2194	32.2624		8.52489	8.50226	8.56788	8.54525		8.53507		8.53507	8.53507	8.53507	8.53507
144h	22.3892	22.4405	30.4855	30.904		8.09632	8.04501	8.5148	8.4635									0.192364	0.141056	0.610852	0.559544		0.875171	0.906855	0.65481	0.678516		0.778838	0.130532
ck_144h	23.0255	23.1423	31.0049	30.9707		7.97946	7.86265	7.94525	7.82844		7.90395		7.90395	7.90395	7.90395	7.90395
Time	Ta2291		TaGRF5-4A			△Ct					Average(△Ct)		Average(△Ct)					△△Ct					2^-△△Ct					Average(2^-△△Ct)	Stdeva
2h	23.9074	23.4428	37.8015	39.0058		13.8942	14.3588	15.0984	15.563									2.44873	2.91331	3.65295	4.11753		0.183172	0.132742	0.0794973	0.0576104		0.113255	0.0562851
ck_2h	25.1602	25.2757	36.8881	36.4387		11.7279	11.6124	11.2785	11.163		11.4455		11.4455	11.4455	11.4455	11.4455		0.282431	0.166932	-0.166932	-0.282431		0.822204	0.890735	1.12267	1.21624		1.01296	0.186803
4h	25.3218	25.2664	38.7191	38.8482		13.3974	13.4528	13.5264	13.5818									-0.163452	-0.108054	-0.0343871	0.0210108		1.11996	1.07777	1.02412	0.985542		1.05185	0.0590962
ck_4h	23.663	23.9724	37.1883	37.5688		13.5253	13.2159	13.9057	13.5964		13.5608		13.5608	13.5608	13.5608	13.5608
8h	23.7496	23.99	36.3116	36.1856		12.562	12.3216	12.436	12.1956									0.25626	0.0158876	0.130269	-0.110103		0.837256	0.989048	0.913661	1.07931		0.954818	0.103575
ck_8h	25.4123	26.0069	38.1951	37.8355		12.7828	12.1882	12.4232	11.8286		12.3057		12.3057	12.3057	12.3057	12.3057
12h	25.2026	25.052	36.2804	36.4517		11.0778	11.2284	11.2491	11.3997									0.36832	0.518914	0.539616	0.69021		0.774684	0.697897	0.687954	0.619764		0.695075	0.0634246
ck_12h	26.1048	25.3668	35.7805	37.11		9.67572	10.4137	11.0053	11.7432		10.7095		10.7095	10.7095	10.7095	10.7095
24h	24.0212	23.79	36.9042	37.145		12.883	13.1142	13.1237	13.355									2.21311	2.44435	2.45386	2.6851		0.215669	0.183728	0.182522	0.15549		0.184352	0.0246135
ck_24h	25.7421	25.285	36.2211	36.1458		10.479	10.9361	10.4037	10.8608		10.6699		10.6699	10.6699	10.6699	10.6699
96h	26.5645	26.4376	37.2379	37.2066		10.6734	10.8003	10.6421	10.769									-1.00241	-0.875498	-1.03376	-0.90685		2.00334	1.83464	2.04736	1.87495		1.94007	0.10144
ck_96h	25.2787	25.542	37.1065	37.0658		11.8278	11.5645	11.7871	11.5238		11.6758		11.6758	11.6758	11.6758	11.6758
144h	23.7791	23.9272	37.1068	37.5471		13.3276	13.1796	13.7679	13.6199									1.08976	0.941737	1.53004	1.38202		0.46984	0.520606	0.346269	0.383682		0.430099	0.0794835
ck_144h	23.9933	23.7885	36.2176	36.04		12.2243	12.4291	12.0467	12.2515		12.2379		12.2379	12.2379	12.2379	12.2379
Time	Ta2291		TaGRF6-4A			△Ct					Average(△Ct)		Average(△Ct)					△△Ct					2^-△△Ct					Average(2^-△△Ct)	Stdeva
2h	23.1122	23.0686	35.954	36.3699		12.8418	12.8854	13.2577	13.3013									-0.8634	-0.8198	-0.4475	-0.4039		1.81932	1.76516	1.36367	1.32308		1.56781	0.26062
ck_2h	23.4412	23.6856	37.1429	37.3942		13.7018	13.4574	13.953	13.7086		13.7052		13.7052	13.7052	13.7052	13.7052		-0.0034006	-0.247811	0.247811	0.0034006		1.00236	1.1874	0.842173	0.997646		1.0074	0.141211
4h	24.1177	24.2452	36.6899	36.8365		12.5722	12.4447	12.7188	12.5914									-0.44197	-0.569433	-0.295319	-0.422782		1.35846	1.48394	1.22716	1.34051		1.35252	0.105145
ck_4h	23.2111	23.2377	36.1188	36.3583		12.9076	12.8811	13.1472	13.1206		13.0141		13.0141	13.0141	13.0141	13.0141
8h	22.6179	22.8474	36.1027	36.6279		13.4848	13.2553	14.01	13.7805									2.18447	1.95494	2.70966	2.48013		0.219993	0.257932	0.152867	0.179229		0.202505	0.0461293
ck_8h	24.7453	24.7119	36.3533	35.7045		11.6081	11.6415	10.9593	10.9926		11.3004		11.3004	11.3004	11.3004	11.3004
12h	23.6987	23.6448	36.8513	37.2011		13.1526	13.2066	13.5023	13.5563									-0.835203	-0.781267	-0.485502	-0.431565		1.78411	1.71864	1.40007	1.3487		1.56288	0.220291
ck_12h	22.1695	22.4204	36.82	35.7456		14.6505	14.3996	13.5761	13.3252		13.9878		13.9878	13.9878	13.9878	13.9878
24h	23.2773	23.172	36.0394	36.0134		12.7621	12.8674	12.7362	12.8414									-1.37605	-1.27078	-1.40199	-1.29672		2.59557	2.41292	2.64265	2.45669		2.52696	0.109595
ck_24h	22.3463	22.3068	36.5529	36.3765		14.2066	14.2461	14.0302	14.0697		14.1382		14.1382	14.1382	14.1382	14.1382
96h	25.7271	25.8341	37.1376	37.3322		11.4105	11.3035	11.6051	11.498									-1.81577	-1.9228	-1.62123	-1.72826		3.52047	3.79159	3.07636	3.31327		3.42542	0.304156
ck_96h	23.6945	23.7172	37.2494	36.6149		13.5549	13.5322	12.9204	12.8977		13.2263		13.2263	13.2263	13.2263	13.2263
144h	22.3892	22.4405	35.8122	35.2817		13.4229	13.3716	12.8925	12.8411									0.151778	0.100471	-0.378709	-0.430017		0.90014	0.932729	1.30018	1.34725		1.12007	0.236301
ck_144h	23.0255	23.1423	36.3328	36.3773		13.3073	13.1905	13.3518	13.235		13.2712		13.2712	13.2712	13.2712	13.2712
Time	Ta2291		TaGRF9-6D			△Ct					Average(△Ct)		Average(△Ct)					△△Ct					2^-△△Ct					Average(2^-△△Ct)	Stdeva
2h	22.9315	22.9573	31.2708	31.3503		8.33921	8.31342	8.41872	8.39293									0.788374	0.762579	0.86788	0.842086		0.578996	0.589442	0.547951	0.557836		0.568556	0.0190147
ck_2h	24.2172	24.1905	31.7404	31.7691		7.52316	7.54985	7.55183	7.57853		7.55084		7.55084	7.55084	7.55084	7.55084		-0.0276842	-0.000990682	0.000990682	0.0276842		1.01937	1.00069	0.999314	0.980994		1.00009	0.0156793
4h	23.8931	23.9686	32.0481	32.3192		8.15497	8.07945	8.42608	8.35057									0.662546	0.587028	0.933658	0.85814		0.631762	0.665713	0.523529	0.551663		0.593167	0.0666445
ck_4h	23.5896	23.4931	31.0198	31.0477		7.43025	7.52667	7.45818	7.5546		7.49243		7.49243	7.49243	7.49243	7.49243
8h	21.2191	20.8567	30.5828	30.6355		9.3637	9.72614	9.41633	9.77877									1.18916	1.5516	1.24179	1.60423		0.438559	0.341131	0.422849	0.328911		0.382862	0.0558371
ck_8h	24.2552	24.0869	32.1907	32.5005		7.93553	8.10378	8.2453	8.41355		8.17454		8.17454	8.17454	8.17454	8.17454
12h	22.3005	22.2434	31.6281	31.6076		9.32761	9.38465	9.30711	9.36415									2.76438	2.82142	2.74388	2.80092		0.147177	0.141471	0.149283	0.143496		0.145357	0.00352547
ck_12h	23.1335	22.8404	29.1527	29.9476		6.0192	6.31229	6.81417	7.10726		6.56323		6.56323	6.56323	6.56323	6.56323
24h	22.5563	22.6071	30.7976	31.0893		8.24129	8.19049	8.53302	8.48221									-1.56	-1.6108	-1.26827	-1.31907		2.94853	3.05421	2.40873	2.49506		2.72663	0.322096
ck_24h	22.2967	22.6286	32.2768	32.251		9.98011	9.64827	9.9543	9.62247		9.80129		9.80129	9.80129	9.80129	9.80129
96h	25.2803	25.3616	34.0161	33.6058		8.73581	8.65443	8.3256	8.24421									0.726065	0.644681	0.31585	0.234467		0.604551	0.639634	0.803377	0.849999		0.72439	0.120501
ck_96h	23.2412	23.2286	31.3714	31.1178		8.13023	8.1429	7.87659	7.88926		8.00975		8.00975	8.00975	8.00975	8.00975
144h	21.884	21.6671	32.0131	31.9274		10.1291	10.346	10.0434	10.2603									0.287287	0.504171	0.201605	0.41849		0.819442	0.705065	0.869582	0.748207		0.785574	0.0732174
ck_144h	21.9037	21.9223	31.7333	31.7764		9.82956	9.81097	9.87262	9.85403		9.8418		9.8418	9.8418	9.8418	9.8418
Time	Ta2291		TaGRF10-6A			△Ct					Average(△Ct)		Average(△Ct)					△△Ct					2^-△△Ct					Average(2^-△△Ct)	Stdeva
2h	23.1122	23.0686	34.025	34.49		10.9128	10.9564	11.3778	11.4214									-0.442703	-0.399104	0.022228	0.0658271		1.35915	1.31869	0.984711	0.955397		1.15449	0.213939
ck_2h	23.4412	23.6856	34.9009	34.9369		11.4597	11.2153	11.4958	11.2514		11.3555		11.3555	11.3555	11.3555	11.3555		0.104158	-0.140252	0.140252	-0.104158		0.930348	1.1021	0.90736	1.07487		1.00367	0.0990096
4h	24.1177	24.2452	33.0624	33.1189		8.94469	8.81723	9.00116	8.87369									-1.93077	-2.05823	-1.8743	-2.00177		3.81258	4.16476	3.66624	4.0049		3.91212	0.218171
ck_4h	23.2111	23.2377	34.1994	34.0004		10.9882	10.9617	10.7892	10.7627		10.8755		10.8755	10.8755	10.8755	10.8755
8h	22.6179	22.8474	32.7072	32.7608		10.0893	9.85972	10.1429	9.91336									0.320375	0.090847	0.374008	0.14448		0.800861	0.938971	0.771636	0.904706		0.854044	0.080413
ck_8h	24.7453	24.7119	34.7478	34.247		10.0026	10.036	9.50178	9.53517		9.76888		9.76888	9.76888	9.76888	9.76888
12h	23.6987	23.6448	33.0542	33.6492		9.35549	9.40943	9.95055	10.0045									-0.0551557	-0.00121917	0.539897	0.593834		1.03897	1.00085	0.68782	0.66258		0.847554	0.199891
ck_12h	22.1695	22.4204	31.7222	31.6891		9.55268	9.30176	9.51954	9.26862		9.41065		9.41065	9.41065	9.41065	9.41065
24h	23.2773	23.172	34.3107	34.5298		11.0334	11.1387	11.2525	11.3578									-1.23037	-1.1251	-1.01129	-0.906025		2.34628	2.18117	2.01572	1.87388		2.10426	0.204454
ck_24h	22.3463	22.3068	34.7506	34.4301		12.4043	12.4438	12.0838	12.1233		12.2638		12.2638	12.2638	12.2638	12.2638
96h	25.7271	25.8341	33.8408	33.6671		8.11375	8.00671	7.94001	7.83298									-2.33485	-2.44188	-2.50858	-2.61561		5.04499	5.4335	5.69061	6.12884		5.57448	0.454986
ck_96h	23.6945	23.7172	34.2267	34.0822		10.5322	10.5095	10.3877	10.365		10.4486		10.4486	10.4486	10.4486	10.4486
144h	22.3892	22.4405	33.4667	33.371		11.0775	11.0262	10.9818	10.9305									0.503951	0.452644	0.408228	0.35692		0.705173	0.730703	0.753548	0.78083		0.742563	0.0322683
ck_144h	23.0255	23.1423	33.6621	33.6527		10.6366	10.5198	10.6272	10.5104		10.5735		10.5735	10.5735	10.5735	10.5735
Time	Ta2291		TaGRF10-6B			△Ct					Average(△Ct)		Average(△Ct)					△△Ct					2^-△△Ct					Average(2^-△△Ct)	Stdeva
2h	22.9315	22.9573	32.8427	32.8968		9.91111	9.88531	9.96523	9.93943									-0.297892	-0.323687	-0.243773	-0.269568		1.22935	1.25152	1.18409	1.20545		1.2176	0.0292108
ck_2h	24.2172	24.1905	34.3694	34.4564		10.1521	10.1788	10.2392	10.2659		10.209		10.209	10.209	10.209	10.209		-0.0568565	-0.030163	0.030163	0.0568565		1.0402	1.02113	0.97931	0.961357		1.0005	0.0364352
4h	23.8931	23.9686	32.9316	32.918		9.03848	8.96296	9.02485	8.94933									-1.38682	-1.46234	-1.40045	-1.47597		2.61502	2.75555	2.63984	2.78171		2.69803	0.0828387
ck_4h	23.5896	23.4931	34.0559	33.8774		10.4664	10.5628	10.2878	10.3842		10.4253		10.4253	10.4253	10.4253	10.4253
8h	21.2191	20.8567	32.1316	32.0564		10.9124	11.2749	10.8373	11.1997									0.930617	1.29306	0.855452	1.2179		0.524634	0.408084	0.552692	0.429908		0.478829	0.0705973
ck_8h	24.2552	24.0869	34.1598	34.146		9.9046	10.0729	9.8908	10.059		9.98182		9.98182	9.98182	9.98182	9.98182
12h	22.3005	22.2434	33.4863	33.438		11.1858	11.2429	11.1375	11.1946									2.00606	2.0631	1.95774	2.01478		0.248952	0.239302	0.257432	0.247452		0.248284	0.00742741
ck_12h	23.1335	22.8404	31.5899	32.7435		8.45639	8.74948	9.61007	9.90316		9.17977		9.17977	9.17977	9.17977	9.17977
24h	22.5563	22.6071	33.7445	33.8872		11.1882	11.1374	11.3309	11.2801									0.184683	0.13388	0.327428	0.276625		0.879842	0.911377	0.796956	0.82552		0.853424	0.0517165
ck_24h	22.2967	22.6286	33.5516	33.3807		11.2549	10.9231	11.084	10.7521		11.0035		11.0035	11.0035	11.0035	11.0035
96h	25.2803	25.3616	33.5001	34.0297		8.21981	8.13843	8.74947	8.66809									-2.11992	-2.2013	-1.59026	-1.67164		4.3467	4.59895	3.01103	3.18577		3.78561	0.803351
ck_96h	23.2412	23.2286	33.5471	33.6022		10.3058	10.3185	10.3609	10.3736		10.3397		10.3397	10.3397	10.3397	10.3397
144h	21.884	21.6671	33.4466	33.5056		11.5626	11.7795	11.6216	11.8385									0.828998	1.04588	0.887963	1.10485		0.56292	0.484349	0.540376	0.464951		0.513149	0.0460831
ck_144h	21.9037	21.9223	32.8994	32.3939		10.9957	10.9771	10.4902	10.4716		10.7336		10.7336	10.7336	10.7336	10.7336
Time	Ta2291		TaGRF10-6D			△Ct					Average(△Ct)		Average(△Ct)					△△Ct					2^-△△Ct					Average(2^-△△Ct)	Stdeva
2h	22.9315	22.9573	35.8923	35.1151		12.9608	12.935	12.1836	12.1578									0.529061	0.503266	-0.248103	-0.273898		0.693006	0.705508	1.18764	1.20907		0.948807	0.288334
ck_2h	24.2172	24.1905	36.636	36.6352		12.4187	12.4454	12.418	12.4447		12.4317		12.4317	12.4317	12.4317	12.4317		-0.0129737	0.0137198	-0.0137198	0.0129737		1.00903	0.990535	1.00956	0.991048		1.00004	0.0106868
4h	23.8931	23.9686	36.5553	36.9432		12.6622	12.5866	13.0501	12.9746									1.543	1.46748	1.93096	1.85544		0.343172	0.361614	0.262254	0.276348		0.310847	0.0489002
ck_4h	23.5896	23.4931	34.5341	34.7869		10.9445	11.0409	11.1974	11.2938		11.1192		11.1192	11.1192	11.1192	11.1192
8h	21.2191	20.8567	34.7019	35.1595		13.4828	13.8452	13.9403	14.3028									1.56897	1.93142	2.02652	2.38896		0.337049	0.262171	0.245447	0.190919		0.258897	0.0603331
ck_8h	24.2552	24.0869	36.3794	35.7903		12.1242	12.2925	11.5352	11.7034		11.9138		11.9138	11.9138	11.9138	11.9138
12h	22.3005	22.2434	35.6466	36.0752		13.3461	13.4032	13.7747	13.8318									2.10401	2.16105	2.53262	2.58966		0.23261	0.223593	0.172824	0.166125		0.198788	0.0341578
ck_12h	23.1335	22.8404	34.7244	33.7336		11.591	11.884	10.6002	10.8933		11.2421		11.2421	11.2421	11.2421	11.2421
24h	22.5563	22.6071	36.5747	36.7617		14.0184	13.9676	14.2054	14.1546									1.01414	0.963338	1.20115	1.15034		0.495123	0.512869	0.43493	0.450518		0.47336	0.0366661
ck_24h	22.2967	22.6286	35.467	35.4669		13.1702	12.8384	13.1702	12.8384		13.0043		13.0043	13.0043	13.0043	13.0043
96h	25.2803	25.3616	36.2821	36.3533		11.0018	10.9204	11.073	10.9916									-1.59644	-1.67783	-1.52525	-1.60663		3.02397	3.19945	2.87836	3.0454		3.03679	0.131401
ck_96h	23.2412	23.2286	35.9397	35.7266		12.6984	12.7111	12.4854	12.4981		12.5983		12.5983	12.5983	12.5983	12.5983
144h	21.884	21.6671	35.1759	35.5729		13.2919	13.5088	13.6889	13.9058									-0.561132	-0.344247	-0.164095	0.0527899		1.47543	1.26949	1.12046	0.96407		1.20736	0.217915
ck_144h	21.9037	21.9223	35.6295	35.9026		13.7257	13.7071	13.9989	13.9803		13.853		13.853	13.853	13.853	13.853
Time	Ta2291		TaGRF11-7A			△Ct					Average(△Ct)		Average(△Ct)					△△Ct					2^-△△Ct					Average(2^-△△Ct)	Stdeva
2h	22.9002	22.9213	30.492	30.461		7.59176	7.5707	7.56077	7.53972									0.341647	0.320591	0.310662	0.289605		0.78914	0.800742	0.806272	0.818126		0.80357	0.0120471
ck_2h	24.2579	24.4971	31.5457	31.7094		7.28788	7.04868	7.45154	7.21234		7.25011		7.25011	7.25011	7.25011	7.25011		0.0377702	-0.201429	0.201429	-0.0377702		0.974159	1.14984	0.869689	1.02653		1.00505	0.116478
4h	24.8922	24.7894	30.5814	30.6138		5.68925	5.79202	5.72164	5.82441									-0.962591	-0.859817	-0.930206	-0.827432		1.94881	1.81481	1.90555	1.77452		1.86092	0.0802214
ck_4h	23.7792	23.7871	30.4113	30.4587		6.63206	6.62418	6.6795	6.67162		6.65184		6.65184	6.65184	6.65184	6.65184
8h	22.557	22.3136	29.0504	28.9177		6.49346	6.73685	6.3607	6.60409									0.646826	0.890217	0.514066	0.757458		0.638684	0.539533	0.700246	0.591538		0.6175	0.0684314
ck_8h	24.3779	24.1886	30.1143	30.1455		5.73631	5.92567	5.7676	5.95696		5.84663		5.84663	5.84663	5.84663	5.84663
12h	23.4304	23.5907	29.7601	29.8004		6.32966	6.16941	6.37003	6.20977									-0.171325	-0.331579	-0.130962	-0.291215		1.12609	1.25839	1.09502	1.22367		1.17579	0.0776924
ck_12h	24.0586	24.3175	30.2507	31.1274		6.19205	5.93317	7.06881	6.80992		6.50099		6.50099	6.50099	6.50099	6.50099
24h	23.4515	23.4344	30.3809	30.4472		6.92937	6.94645	6.99574	7.01282									-0.790667	-0.773588	-0.724292	-0.707213		1.72987	1.70952	1.65209	1.63265		1.68103	0.0461002
ck_24h	22.6951	22.6747	30.2439	30.5659		7.54885	7.56925	7.87082	7.89122		7.72003		7.72003	7.72003	7.72003	7.72003
96h	25.5909	25.3838	31.974	31.4046		6.38308	6.59025	5.81364	6.02081									0.00509783	0.212269	-0.564347	-0.357175		0.996473	0.863179	1.47872	1.28092		1.15482	0.277452
ck_96h	23.7521	23.8725	30.1987	30.182		6.44653	6.32613	6.42984	6.30943		6.37798		6.37798	6.37798	6.37798	6.37798
144h	22.5463	22.3573	28.9097	28.9296		6.36338	6.5524	6.3833	6.57231									-0.361488	-0.172471	-0.341574	-0.152558		1.28475	1.12699	1.26714	1.11154		1.1976	0.0909643
ck_144h	23.5685	23.5112	30.4256	30.1038		6.85709	6.91445	6.53529	6.59266		6.72487		6.72487	6.72487	6.72487	6.72487
Time	Ta2291		TaGRF11-7D			△Ct					Average(△Ct)		Average(△Ct)					△△Ct					2^-△△Ct					Average(2^-△△Ct)	Stdeva
2h	22.9002	22.9213	32.0558	32.1106		9.15556	9.13451	9.21038	9.18932									0.910701	0.889644	0.965517	0.944461		0.531927	0.539747	0.512095	0.519624		0.525848	0.0123562
ck_2h	24.2579	24.4971	32.5972	32.6474		8.33935	8.10015	8.38957	8.15037		8.24486		8.24486	8.24486	8.24486	8.24486		0.0944906	-0.144709	0.144709	-0.0944906		0.936603	1.10551	0.904562	1.06769		1.00359	0.0979619
4h	24.8922	24.7894	31.5758	31.6317		6.68365	6.78642	6.73954	6.84232									-1.10818	-1.0054	-1.05228	-0.949508		2.15573	2.00751	2.07381	1.93121		2.04207	0.0955861
ck_4h	23.7792	23.7871	31.3998	31.7501		7.62063	7.61275	7.9709	7.96302		7.79182		7.79182	7.79182	7.79182	7.79182
8h	22.557	22.3136	30.1099	30.0844		7.55296	7.79635	7.52741	7.7708									-0.68979	-0.446399	-0.715337	-0.471946		1.61305	1.36263	1.64187	1.38698		1.50113	0.146679
ck_8h	24.3779	24.1886	32.2175	32.8345		7.83956	8.02892	8.45658	8.64594		8.24275		8.24275	8.24275	8.24275	8.24275
12h	23.4304	23.5907	30.737	30.7588		7.30658	7.14633	7.32841	7.16816									0.201079	0.0408257	0.222912	0.0626591		0.8699	0.972098	0.856834	0.957498		0.914082	0.0591051
ck_12h	24.0586	24.3175	31.0912	31.4959		7.03259	6.77371	7.4373	7.17841		7.1055		7.1055	7.1055	7.1055	7.1055
24h	23.4515	23.4344	31.7033	31.939		8.2518	8.26888	8.48753	8.50461									-1.49556	-1.47848	-1.25982	-1.24274		2.81973	2.78655	2.39466	2.36647		2.59185	0.244619
ck_24h	22.6951	22.6747	32.3139	32.5506		9.61878	9.63918	9.85553	9.87593		9.74735		9.74735	9.74735	9.74735	9.74735
96h	25.5909	25.3838	33.063	33.1324		7.47202	7.67919	7.54142	7.74859									-0.187919	0.019252	-0.118522	0.0886487		1.13912	0.986744	1.08562	0.940403		1.03797	0.0906373
ck_96h	23.7521	23.8725	31.5189	31.4257		7.76676	7.64635	7.67353	7.55312		7.65994		7.65994	7.65994	7.65994	7.65994
144h	22.5463	22.3573	30.4718	30.5531		7.92549	8.11451	8.00672	8.19574									0.246295	0.435311	0.327528	0.516545		0.843059	0.739534	0.796901	0.699044		0.769634	0.0633078
ck_144h	23.5685	23.5112	31.162	31.2761		7.59344	7.65081	7.70758	7.76495		7.6792		7.6792	7.6792	7.6792	7.6792
