# Supplementary material for: Genome-wide analysis of growth-regulating factors (GRFs) in Triticum aestivum
Source: PeerJ. 2021 Jan 19;9:e10701. doi: 10.7717/peerj.10701 (PMC7821759; doi:10.7717/peerj.10701)
Supplement: Table S2 [file peerj-09-10701-s002.xlsx]

## Sheet: Sheet1
Table S2. GRFs Identified in Triticum urartu, Triticum dicoccoides, Aegilops tauschii, and Triticum aestivum.
Specises	ID	Protein ID	CHR	Starting	Ending
Aegilops tauschii	AeGRF1	AET2Gv20538200.2	Ae_Chr2D	277213443	277215858
Aegilops tauschii	AeGRF2	AET2Gv20886700.2	Ae_Chr2D	505565012	505566266
Aegilops tauschii	AeGRF3	AET2Gv20964200.2	Ae_Chr2D	544931065	544935034
Aegilops tauschii	AeGRF4	AET4Gv20034000.11	Ae_Chr4D	7856680	7864074
Aegilops tauschii	AeGRF5	AET4Gv20124900.1	Ae_Chr4D	37815927	37820070
Aegilops tauschii	AeGRF6	AET6Gv20664900.2	Ae_Chr6D	362564965	362566264
Aegilops tauschii	AeGRF7	AET6Gv20686100.2	Ae_Chr6D	377411606	377415412
Aegilops tauschii	AeGRF8	AET6Gv20825100.3	Ae_Chr6D	447881010	447882445
Aegilops tauschii	AeGRF9	AET7Gv20107900.4	Ae_Chr7D	21622189	21625267
Aegilops tauschii	AeGRF10	AET7Gv20433900.2	Ae_Chr7D	119235416	119236497
Triticum urartu	TuGRF1	TuG1812G0200004500.01.T01	Tu_Chr2A	631777900	631778973
Triticum urartu	TuGRF2	TuG1812G0200004855.01.T01	Tu_Chr2A	665117961	665121708
Triticum urartu	TuGRF3	TuG1812G0200005465.01.T01	Tu_Chr2A	709297066	709299859
Triticum urartu	TuGRF4	TuG1812G0600002856.01.T01	Tu_Chr6A	449820741	449821799
Triticum urartu	TuGRF5	TuG1812G0600003593.01.T01	Tu_Chr6A	527002145	527004032
Triticum urartu	TuGRF6	TuG1812G0700001763.01.T01	Tu_Chr7A	120311080	120312467
Triticum dicoccoides	TdGRF1	TRIDC2AG032100.1	Td_Chr2A	305521133	305523679
Triticum dicoccoides	TdGRF2	TRIDC2AG057630.1	Td_Chr2A	645824074	645824973
Triticum dicoccoides	TdGRF3	TRIDC2AG062550.2	Td_Chr2A	680343673	680346875
Triticum dicoccoides	TdGRF4	TRIDC2BG034590.1	Td_Chr2B	281223761	281226304
Triticum dicoccoides	TdGRF5	TRIDC2BG060470.2	Td_Chr2B	593021626	593022630
Triticum dicoccoides	TdGRF6	TRIDC2BG066890.1	Td_Chr2B	649416222	649419499
Triticum dicoccoides	TdGRF7	TRIDC4AG039920.3	Td_Chr4A	560400026	560402795
Triticum dicoccoides	TdGRF8	TRIDC4AG044870.4	Td_Chr4A	587328018	587331174
Triticum dicoccoides	TdGRF9	TRIDC4AG065110.1	Td_Chr4A	693885434	693888421
Triticum dicoccoides	TdGRF10	TRIDC4BG003830.1	Td_Chr4B	14917660	14921313
Triticum dicoccoides	TdGRF11	TRIDC4BG009270.1	Td_Chr4B	49483215	49485858
Triticum dicoccoides	TdGRF12	TRIDC6AG039700.1	Td_Chr6A	481434869	481435684
Triticum dicoccoides	TdGRF13	TRIDC6AG041360.3	Td_Chr6A	497980232	497986204
Triticum dicoccoides	TdGRF14	TRIDC6BG046580.1	Td_Chr6B	498497904	498498787
Triticum dicoccoides	TdGRF15	TRIDC6BG048340.2	Td_Chr6B	517412680	517416237
Triticum dicoccoides	TdGRF16	TRIDC7AG005090.2	Td_Chr7A	18153215	18156420
Triticum dicoccoides	TdGRF17	TRIDC7AG020510.2	Td_Chr7A	118598652	118599786
Triticum dicoccoides	TdGRF18	TRIDC7BG010470.1	Td_Chr7B	80766940	80768111
Triticum aestivum	TaGRF1-2A	TraesCS2A02G238700.1	Ta_Chr2A	323528641	323530709
Triticum aestivum	TaGRF1-2B	TraesCS2B02G256600.1	Ta_Chr2B	298324714	298327379
Triticum aestivum	TaGRF1-2D	TraesCS2D02G246600.1	Ta_Chr2D	288225741	288228187
Triticum aestivum	TaGRF2-2A	TraesCS2A02G398300.1	Ta_Chr2A	651752444	651753584
Triticum aestivum	TaGRF2-2B	TraesCS2B02G416300.1	Ta_Chr2B	594982278	594983776
Triticum aestivum	TaGRF2-2D	TraesCS2D02G395900.1	Ta_Chr2D	506941472	506942539
Triticum aestivum	TaGRF3-2A	TraesCS2A02G435100.1	Ta_Chr2A	687048698	687052485
Triticum aestivum	TaGRF3-2B	TraesCS2B02G458400.1	Ta_Chr2B	653016354	653019980
Triticum aestivum	TaGRF3-2D	TraesCS2D02G435200.1	Ta_Chr2D	546208318	546212200
Triticum aestivum	TaGRF4-4A	TraesCS4A02G255000.1	Ta_Chr4A	567181384	567185511
Triticum aestivum	TaGRF4-4B	TraesCS4B02G060000.1	Ta_Chr4B	51679625	51683720
Triticum aestivum	TaGRF4-4D	TraesCS4D02G059600.1	Ta_Chr4D	35476875	35481038
Triticum aestivum	TaGRF5-4A	TraesCS4A02G291500.1	Ta_Chr4A	594532829	594535533
Triticum aestivum	TaGRF5-4D	TraesCS4D02G020300.1	Ta_Chr4D	8777205	8779937
Triticum aestivum	TaGRF6-4A	TraesCS4A02G434900.1	Ta_Chr4A	705509912	705513259
Triticum aestivum	TaGRF7-6A	TraesCS6A02G174800.1	Ta_Chr6A	188250927	188252018
Triticum aestivum	TaGRF8-6A	TraesCS6A02G257600.1	Ta_Chr6A	479833651	479834702
Triticum aestivum	TaGRF8-6B	TraesCS6B02G267500.1	Ta_Chr6B	481089083	481090143
Triticum aestivum	TaGRF8-6D	TraesCS6D02G238900.1	Ta_Chr6D	339389350	339390413
Triticum aestivum	TaGRF9-6A	TraesCS6A02G269600.1	Ta_Chr6A	496010434	496017229
Triticum aestivum	TaGRF9-6B	TraesCS6B02G296900.1	Ta_Chr6B	532899954	532903804
Triticum aestivum	TaGRF9-6D	TraesCS6D02G245300.1	Ta_Chr6D	347433246	347436961
Triticum aestivum	TaGRF10-6A	TraesCS6A02G335900.1	Ta_Chr6A	568515906	568517951
Triticum aestivum	TaGRF10-6B	TraesCS6B02G366700.1	Ta_Chr6B	639532839	639534932
Triticum aestivum	TaGRF10-6D	TraesCS6D02G315700.1	Ta_Chr6D	423814859	423816885
Triticum aestivum	TaGRF11-7A	TraesCS7A02G049100.1	Ta_Chr7A	22937762	22940558
Triticum aestivum	TaGRF11-7D	TraesCS7D02G044200.1	Ta_Chr7D	22586526	22589173
Triticum aestivum	TaGRF12-7A	TraesCS7A02G165600.1	Ta_Chr7A	121056090	121057606
Triticum aestivum	TaGRF12-7B	TraesCS7B02G070200.1	Ta_Chr7B	76903837	76905287
Triticum aestivum	TaGRF12-7D	TraesCS7D02G166400.1	Ta_Chr7D	117132680	117134270
