# Supplementary material for: Genome-wide analysis of growth-regulating factors (GRFs) in Triticum aestivum
Source: PeerJ. 2021 Jan 19;9:e10701. doi: 10.7717/peerj.10701 (PMC7821759; doi:10.7717/peerj.10701)
Supplement: Table S3 [file peerj-09-10701-s003.xlsx]

## Sheet: Sheet1
Table S3. The GFF3 file of TaGRFs, TdGRFs, AeGRFs, and TuGRFs.
ID	chromosome	source	type	start	end	score	strand	phase	attributes
TaGRF1-2A	chr2A	IWGSC_v1.1_201706	mRNA	323528641	323530709	55	-	.	ID=TraesCS2A02G238700.1;Parent=TraesCS2A02G238700;Name=TraesCS2A02G238700.1;Note=TraesCS2A01G238700;secconf=HC2;primconf=HC
TaGRF1-2A	chr2A	IWGSC_v1.1_201706	three_prime_UTR	323528641	323528791	.	-	.	ID=TraesCS2A02G238700.1.utr3p1;Parent=TraesCS2A02G238700.1
TaGRF1-2A	chr2A	IWGSC_v1.1_201706	exon	323528641	323529108	.	-	.	ID=TraesCS2A02G238700.1.exon1;Parent=TraesCS2A02G238700.1
TaGRF1-2A	chr2A	IWGSC_v1.1_201706	CDS	323528792	323529108	.	-	2	ID=TraesCS2A02G238700.1.cds1;Parent=TraesCS2A02G238700.1
TaGRF1-2A	chr2A	IWGSC_v1.1_201706	CDS	323529410	323529634	.	-	2	ID=TraesCS2A02G238700.1.cds2;Parent=TraesCS2A02G238700.1
TaGRF1-2A	chr2A	IWGSC_v1.1_201706	exon	323529410	323529634	.	-	.	ID=TraesCS2A02G238700.1.exon2;Parent=TraesCS2A02G238700.1
TaGRF1-2A	chr2A	IWGSC_v1.1_201706	exon	323529715	323529876	.	-	.	ID=TraesCS2A02G238700.1.exon3;Parent=TraesCS2A02G238700.1
TaGRF1-2A	chr2A	IWGSC_v1.1_201706	CDS	323529715	323529876	.	-	2	ID=TraesCS2A02G238700.1.cds3;Parent=TraesCS2A02G238700.1
TaGRF1-2A	chr2A	IWGSC_v1.1_201706	exon	323530454	323530709	.	-	.	ID=TraesCS2A02G238700.1.exon4;Parent=TraesCS2A02G238700.1
TaGRF1-2A	chr2A	IWGSC_v1.1_201706	CDS	323530454	323530709	.	-	0	ID=TraesCS2A02G238700.1.cds4;Parent=TraesCS2A02G238700.1
TaGRF2-2A	chr2A	IWGSC_v1.1_201706	mRNA	651752444	651753584	.	-	.	ID=TraesCS2A02G398300.1;Parent=TraesCS2A02G398300;Name=TraesCS2A02G398300.1;Note=TraesCS2A01G398300;secconf=HC2;primconf=HC
TaGRF2-2A	chr2A	IWGSC_v1.1_201706	three_prime_UTR	651752444	651752609	.	-	.	ID=TraesCS2A02G398300.1.utr3p1;Parent=TraesCS2A02G398300.1
TaGRF2-2A	chr2A	IWGSC_v1.1_201706	exon	651752444	651752938	.	-	.	ID=TraesCS2A02G398300.1.exon1;Parent=TraesCS2A02G398300.1
TaGRF2-2A	chr2A	IWGSC_v1.1_201706	CDS	651752610	651752938	.	-	2	ID=TraesCS2A02G398300.1.cds1;Parent=TraesCS2A02G398300.1
TaGRF2-2A	chr2A	IWGSC_v1.1_201706	exon	651753068	651753343	.	-	.	ID=TraesCS2A02G398300.1.exon2;Parent=TraesCS2A02G398300.1
TaGRF2-2A	chr2A	IWGSC_v1.1_201706	CDS	651753068	651753343	.	-	2	ID=TraesCS2A02G398300.1.cds2;Parent=TraesCS2A02G398300.1
TaGRF2-2A	chr2A	IWGSC_v1.1_201706	CDS	651753427	651753442	.	-	0	ID=TraesCS2A02G398300.1.cds3;Parent=TraesCS2A02G398300.1
TaGRF2-2A	chr2A	IWGSC_v1.1_201706	exon	651753427	651753584	.	-	.	ID=TraesCS2A02G398300.1.exon3;Parent=TraesCS2A02G398300.1
TaGRF2-2A	chr2A	IWGSC_v1.1_201706	five_prime_UTR	651753443	651753584	.	-	.	ID=TraesCS2A02G398300.1.utr5p1;Parent=TraesCS2A02G398300.1
TaGRF3-2A	chr2A	IWGSC_v1.1_201706	mRNA	687048698	687052485	.	+	.	ID=TraesCS2A02G435100.1;Parent=TraesCS2A02G435100;Name=TraesCS2A02G435100.1;Note=TraesCS2A01G435100;secconf=HC1;primconf=HC
TaGRF3-2A	chr2A	IWGSC_v1.1_201706	five_prime_UTR	687048698	687048952	.	+	.	ID=TraesCS2A02G435100.1.utr5p1;Parent=TraesCS2A02G435100.1
TaGRF3-2A	chr2A	IWGSC_v1.1_201706	exon	687048698	687049044	.	+	.	ID=TraesCS2A02G435100.1.exon1;Parent=TraesCS2A02G435100.1
TaGRF3-2A	chr2A	IWGSC_v1.1_201706	CDS	687048953	687049044	.	+	0	ID=TraesCS2A02G435100.1.cds1;Parent=TraesCS2A02G435100.1
TaGRF3-2A	chr2A	IWGSC_v1.1_201706	CDS	687049161	687049393	.	+	1	ID=TraesCS2A02G435100.1.cds2;Parent=TraesCS2A02G435100.1
TaGRF3-2A	chr2A	IWGSC_v1.1_201706	exon	687049161	687049393	.	+	.	ID=TraesCS2A02G435100.1.exon2;Parent=TraesCS2A02G435100.1
TaGRF3-2A	chr2A	IWGSC_v1.1_201706	exon	687050243	687050606	.	+	.	ID=TraesCS2A02G435100.1.exon3;Parent=TraesCS2A02G435100.1
TaGRF3-2A	chr2A	IWGSC_v1.1_201706	CDS	687050243	687050606	.	+	2	ID=TraesCS2A02G435100.1.cds3;Parent=TraesCS2A02G435100.1
TaGRF3-2A	chr2A	IWGSC_v1.1_201706	CDS	687051665	687052130	.	+	1	ID=TraesCS2A02G435100.1.cds4;Parent=TraesCS2A02G435100.1
TaGRF3-2A	chr2A	IWGSC_v1.1_201706	exon	687051665	687052485	.	+	.	ID=TraesCS2A02G435100.1.exon4;Parent=TraesCS2A02G435100.1
TaGRF3-2A	chr2A	IWGSC_v1.1_201706	three_prime_UTR	687052131	687052485	.	+	.	ID=TraesCS2A02G435100.1.utr3p1;Parent=TraesCS2A02G435100.1
TaGRF1-2B	chr2B	IWGSC_v1.1_201706	mRNA	298324714	298327379	.	-	.	ID=TraesCS2B02G256600.1;Parent=TraesCS2B02G256600;Note=TraesCS2B01G256600;Name=TraesCS2B02G256600.1;primconf=HC;secconf=HC2
TaGRF1-2B	chr2B	IWGSC_v1.1_201706	three_prime_UTR	298324714	298325227	.	-	.	ID=TraesCS2B02G256600.1.utr3p1;Parent=TraesCS2B02G256600.1
TaGRF1-2B	chr2B	IWGSC_v1.1_201706	exon	298324714	298325544	.	-	.	ID=TraesCS2B02G256600.1.exon1;Parent=TraesCS2B02G256600.1
TaGRF1-2B	chr2B	IWGSC_v1.1_201706	CDS	298325228	298325544	.	-	2	ID=TraesCS2B02G256600.1.cds1;Parent=TraesCS2B02G256600.1
TaGRF1-2B	chr2B	IWGSC_v1.1_201706	CDS	298325847	298326056	.	-	2	ID=TraesCS2B02G256600.1.cds2;Parent=TraesCS2B02G256600.1
TaGRF1-2B	chr2B	IWGSC_v1.1_201706	exon	298325847	298326056	.	-	.	ID=TraesCS2B02G256600.1.exon2;Parent=TraesCS2B02G256600.1
TaGRF1-2B	chr2B	IWGSC_v1.1_201706	CDS	298326970	298327219	.	-	0	ID=TraesCS2B02G256600.1.cds3;Parent=TraesCS2B02G256600.1
TaGRF1-2B	chr2B	IWGSC_v1.1_201706	exon	298326970	298327379	.	-	.	ID=TraesCS2B02G256600.1.exon3;Parent=TraesCS2B02G256600.1
TaGRF1-2B	chr2B	IWGSC_v1.1_201706	five_prime_UTR	298327220	298327379	.	-	.	ID=TraesCS2B02G256600.1.utr5p1;Parent=TraesCS2B02G256600.1
TaGRF2-2B	chr2B	IWGSC_v1.1_201706	mRNA	594982278	594983776	.	-	.	ID=TraesCS2B02G416300.1;Parent=TraesCS2B02G416300;Note=TraesCS2B01G416300;Name=TraesCS2B02G416300.1;primconf=HC;secconf=HC1
TaGRF2-2B	chr2B	IWGSC_v1.1_201706	exon	594982278	594982410	.	-	.	ID=TraesCS2B02G416300.1.exon1;Parent=TraesCS2B02G416300.1
TaGRF2-2B	chr2B	IWGSC_v1.1_201706	three_prime_UTR	594982278	594982410	.	-	.	ID=TraesCS2B02G416300.1.utr3p1;Parent=TraesCS2B02G416300.1
TaGRF2-2B	chr2B	IWGSC_v1.1_201706	three_prime_UTR	594982568	594982669	.	-	.	ID=TraesCS2B02G416300.1.utr3p2;Parent=TraesCS2B02G416300.1
TaGRF2-2B	chr2B	IWGSC_v1.1_201706	exon	594982568	594982998	.	-	.	ID=TraesCS2B02G416300.1.exon2;Parent=TraesCS2B02G416300.1
TaGRF2-2B	chr2B	IWGSC_v1.1_201706	CDS	594982670	594982998	.	-	2	ID=TraesCS2B02G416300.1.cds1;Parent=TraesCS2B02G416300.1
TaGRF2-2B	chr2B	IWGSC_v1.1_201706	exon	594983111	594983386	.	-	.	ID=TraesCS2B02G416300.1.exon3;Parent=TraesCS2B02G416300.1
TaGRF2-2B	chr2B	IWGSC_v1.1_201706	CDS	594983111	594983386	.	-	2	ID=TraesCS2B02G416300.1.cds2;Parent=TraesCS2B02G416300.1
TaGRF2-2B	chr2B	IWGSC_v1.1_201706	CDS	594983458	594983536	.	-	0	ID=TraesCS2B02G416300.1.cds3;Parent=TraesCS2B02G416300.1
TaGRF2-2B	chr2B	IWGSC_v1.1_201706	exon	594983458	594983776	.	-	.	ID=TraesCS2B02G416300.1.exon4;Parent=TraesCS2B02G416300.1
TaGRF2-2B	chr2B	IWGSC_v1.1_201706	five_prime_UTR	594983537	594983776	.	-	.	ID=TraesCS2B02G416300.1.utr5p1;Parent=TraesCS2B02G416300.1
TaGRF3-2B	chr2B	IWGSC_v1.1_201706	mRNA	653016354	653019980	.	+	.	ID=TraesCS2B02G458400.1;Parent=TraesCS2B02G458400;Note=TraesCS2B01G458400;Name=TraesCS2B02G458400.1;primconf=HC;secconf=HC1
TaGRF3-2B	chr2B	IWGSC_v1.1_201706	five_prime_UTR	653016354	653016513	.	+	.	ID=TraesCS2B02G458400.1.utr5p1;Parent=TraesCS2B02G458400.1
TaGRF3-2B	chr2B	IWGSC_v1.1_201706	exon	653016354	653016605	.	+	.	ID=TraesCS2B02G458400.1.exon1;Parent=TraesCS2B02G458400.1
TaGRF3-2B	chr2B	IWGSC_v1.1_201706	CDS	653016514	653016605	.	+	0	ID=TraesCS2B02G458400.1.cds1;Parent=TraesCS2B02G458400.1
TaGRF3-2B	chr2B	IWGSC_v1.1_201706	CDS	653016727	653016953	.	+	1	ID=TraesCS2B02G458400.1.cds2;Parent=TraesCS2B02G458400.1
TaGRF3-2B	chr2B	IWGSC_v1.1_201706	exon	653016727	653016953	.	+	.	ID=TraesCS2B02G458400.1.exon2;Parent=TraesCS2B02G458400.1
TaGRF3-2B	chr2B	IWGSC_v1.1_201706	CDS	653017817	653018195	.	+	2	ID=TraesCS2B02G458400.1.cds3;Parent=TraesCS2B02G458400.1
TaGRF3-2B	chr2B	IWGSC_v1.1_201706	exon	653017817	653018195	.	+	.	ID=TraesCS2B02G458400.1.exon3;Parent=TraesCS2B02G458400.1
TaGRF3-2B	chr2B	IWGSC_v1.1_201706	CDS	653019299	653019764	.	+	1	ID=TraesCS2B02G458400.1.cds4;Parent=TraesCS2B02G458400.1
TaGRF3-2B	chr2B	IWGSC_v1.1_201706	exon	653019299	653019980	.	+	.	ID=TraesCS2B02G458400.1.exon4;Parent=TraesCS2B02G458400.1
TaGRF3-2B	chr2B	IWGSC_v1.1_201706	three_prime_UTR	653019765	653019980	.	+	.	ID=TraesCS2B02G458400.1.utr3p1;Parent=TraesCS2B02G458400.1
TaGRF1-2D	chr2D	IWGSC_v1.1_201706	mRNA	288225741	288228187	.	-	.	ID=TraesCS2D02G246600.1;Parent=TraesCS2D02G246600;secconf=HC2;Name=TraesCS2D02G246600.1;primconf=HC;Note=TraesCS2D01G246600
TaGRF1-2D	chr2D	IWGSC_v1.1_201706	three_prime_UTR	288225741	288226199	.	-	.	ID=TraesCS2D02G246600.1.utr3p1;Parent=TraesCS2D02G246600.1
TaGRF1-2D	chr2D	IWGSC_v1.1_201706	exon	288225741	288226516	.	-	.	ID=TraesCS2D02G246600.1.exon1;Parent=TraesCS2D02G246600.1
TaGRF1-2D	chr2D	IWGSC_v1.1_201706	CDS	288226200	288226516	.	-	2	ID=TraesCS2D02G246600.1.cds1;Parent=TraesCS2D02G246600.1
TaGRF1-2D	chr2D	IWGSC_v1.1_201706	exon	288226819	288227043	.	-	.	ID=TraesCS2D02G246600.1.exon2;Parent=TraesCS2D02G246600.1
TaGRF1-2D	chr2D	IWGSC_v1.1_201706	CDS	288226819	288227043	.	-	2	ID=TraesCS2D02G246600.1.cds2;Parent=TraesCS2D02G246600.1
TaGRF1-2D	chr2D	IWGSC_v1.1_201706	CDS	288227865	288228117	.	-	0	ID=TraesCS2D02G246600.1.cds3;Parent=TraesCS2D02G246600.1
TaGRF1-2D	chr2D	IWGSC_v1.1_201706	exon	288227865	288228187	.	-	.	ID=TraesCS2D02G246600.1.exon3;Parent=TraesCS2D02G246600.1
TaGRF1-2D	chr2D	IWGSC_v1.1_201706	five_prime_UTR	288228118	288228187	.	-	.	ID=TraesCS2D02G246600.1.utr5p1;Parent=TraesCS2D02G246600.1
TaGRF2-2D	chr2D	IWGSC_v1.1_201706	mRNA	506941472	506942539	.	-	.	ID=TraesCS2D02G395900.1;Parent=TraesCS2D02G395900;secconf=HC1;Name=TraesCS2D02G395900.1;primconf=HC;Note=TraesCS2D01G395900
TaGRF2-2D	chr2D	IWGSC_v1.1_201706	three_prime_UTR	506941472	506941588	.	-	.	ID=TraesCS2D02G395900.1.utr3p1;Parent=TraesCS2D02G395900.1
TaGRF2-2D	chr2D	IWGSC_v1.1_201706	exon	506941472	506941917	.	-	.	ID=TraesCS2D02G395900.1.exon1;Parent=TraesCS2D02G395900.1
TaGRF2-2D	chr2D	IWGSC_v1.1_201706	CDS	506941589	506941917	.	-	2	ID=TraesCS2D02G395900.1.cds1;Parent=TraesCS2D02G395900.1
TaGRF2-2D	chr2D	IWGSC_v1.1_201706	CDS	506942029	506942304	.	-	2	ID=TraesCS2D02G395900.1.cds2;Parent=TraesCS2D02G395900.1
TaGRF2-2D	chr2D	IWGSC_v1.1_201706	exon	506942029	506942304	.	-	.	ID=TraesCS2D02G395900.1.exon2;Parent=TraesCS2D02G395900.1
TaGRF2-2D	chr2D	IWGSC_v1.1_201706	CDS	506942395	506942479	.	-	0	ID=TraesCS2D02G395900.1.cds3;Parent=TraesCS2D02G395900.1
TaGRF2-2D	chr2D	IWGSC_v1.1_201706	exon	506942395	506942539	.	-	.	ID=TraesCS2D02G395900.1.exon3;Parent=TraesCS2D02G395900.1
TaGRF2-2D	chr2D	IWGSC_v1.1_201706	five_prime_UTR	506942480	506942539	.	-	.	ID=TraesCS2D02G395900.1.utr5p1;Parent=TraesCS2D02G395900.1
TaGRF3-2D	chr2D	IWGSC_v1.1_201706	mRNA	546208318	546212200	.	+	.	ID=TraesCS2D02G435200.1;Parent=TraesCS2D02G435200;secconf=HC1;Name=TraesCS2D02G435200.1;primconf=HC;Note=TraesCS2D01G435200
TaGRF3-2D	chr2D	IWGSC_v1.1_201706	five_prime_UTR	546208318	546208517	.	+	.	ID=TraesCS2D02G435200.1.utr5p1;Parent=TraesCS2D02G435200.1
TaGRF3-2D	chr2D	IWGSC_v1.1_201706	exon	546208318	546208609	.	+	.	ID=TraesCS2D02G435200.1.exon1;Parent=TraesCS2D02G435200.1
TaGRF3-2D	chr2D	IWGSC_v1.1_201706	CDS	546208518	546208609	.	+	0	ID=TraesCS2D02G435200.1.cds1;Parent=TraesCS2D02G435200.1
TaGRF3-2D	chr2D	IWGSC_v1.1_201706	exon	546208728	546208954	.	+	.	ID=TraesCS2D02G435200.1.exon2;Parent=TraesCS2D02G435200.1
TaGRF3-2D	chr2D	IWGSC_v1.1_201706	CDS	546208728	546208954	.	+	1	ID=TraesCS2D02G435200.1.cds2;Parent=TraesCS2D02G435200.1
TaGRF3-2D	chr2D	IWGSC_v1.1_201706	exon	546209784	546210177	.	+	.	ID=TraesCS2D02G435200.1.exon3;Parent=TraesCS2D02G435200.1
TaGRF3-2D	chr2D	IWGSC_v1.1_201706	CDS	546209784	546210177	.	+	2	ID=TraesCS2D02G435200.1.cds3;Parent=TraesCS2D02G435200.1
TaGRF3-2D	chr2D	IWGSC_v1.1_201706	CDS	546211386	546211848	.	+	1	ID=TraesCS2D02G435200.1.cds4;Parent=TraesCS2D02G435200.1
TaGRF3-2D	chr2D	IWGSC_v1.1_201706	exon	546211386	546212200	.	+	.	ID=TraesCS2D02G435200.1.exon4;Parent=TraesCS2D02G435200.1
TaGRF3-2D	chr2D	IWGSC_v1.1_201706	three_prime_UTR	546211849	546212200	.	+	.	ID=TraesCS2D02G435200.1.utr3p1;Parent=TraesCS2D02G435200.1
TaGRF4-4A	chr4A	IWGSC_v1.1_201706	mRNA	567181384	567185511	.	-	.	ID=TraesCS4A02G255000.1;Parent=TraesCS4A02G255000;Note=TraesCS4A01G255000;secconf=HC1;Name=TraesCS4A02G255000.1;primconf=HC
TaGRF4-4A	chr4A	IWGSC_v1.1_201706	three_prime_UTR	567181384	567181745	.	-	.	ID=TraesCS4A02G255000.1.utr3p1;Parent=TraesCS4A02G255000.1
TaGRF4-4A	chr4A	IWGSC_v1.1_201706	exon	567181384	567182622	.	-	.	ID=TraesCS4A02G255000.1.exon1;Parent=TraesCS4A02G255000.1
TaGRF4-4A	chr4A	IWGSC_v1.1_201706	CDS	567181746	567182622	.	-	1	ID=TraesCS4A02G255000.1.cds1;Parent=TraesCS4A02G255000.1
TaGRF4-4A	chr4A	IWGSC_v1.1_201706	CDS	567183216	567183573	.	-	2	ID=TraesCS4A02G255000.1.cds2;Parent=TraesCS4A02G255000.1
TaGRF4-4A	chr4A	IWGSC_v1.1_201706	exon	567183216	567183573	.	-	.	ID=TraesCS4A02G255000.1.exon2;Parent=TraesCS4A02G255000.1
TaGRF4-4A	chr4A	IWGSC_v1.1_201706	CDS	567183717	567183929	.	-	2	ID=TraesCS4A02G255000.1.cds3;Parent=TraesCS4A02G255000.1
TaGRF4-4A	chr4A	IWGSC_v1.1_201706	exon	567183717	567183929	.	-	.	ID=TraesCS4A02G255000.1.exon3;Parent=TraesCS4A02G255000.1
TaGRF4-4A	chr4A	IWGSC_v1.1_201706	CDS	567184846	567185221	.	-	0	ID=TraesCS4A02G255000.1.cds4;Parent=TraesCS4A02G255000.1
TaGRF4-4A	chr4A	IWGSC_v1.1_201706	exon	567184846	567185511	.	-	.	ID=TraesCS4A02G255000.1.exon4;Parent=TraesCS4A02G255000.1
TaGRF4-4A	chr4A	IWGSC_v1.1_201706	five_prime_UTR	567185222	567185511	.	-	.	ID=TraesCS4A02G255000.1.utr5p1;Parent=TraesCS4A02G255000.1
TaGRF5-4A	chr4A	IWGSC_v1.1_201706	mRNA	594532829	594535533	.	-	.	ID=TraesCS4A02G291500.1;Parent=TraesCS4A02G291500;Note=TraesCS4A01G291500;secconf=HC1;Name=TraesCS4A02G291500.1;primconf=HC
TaGRF5-4A	chr4A	IWGSC_v1.1_201706	three_prime_UTR	594532829	594533085	.	-	.	ID=TraesCS4A02G291500.1.utr3p1;Parent=TraesCS4A02G291500.1
TaGRF5-4A	chr4A	IWGSC_v1.1_201706	exon	594532829	594533632	.	-	.	ID=TraesCS4A02G291500.1.exon1;Parent=TraesCS4A02G291500.1
TaGRF5-4A	chr4A	IWGSC_v1.1_201706	CDS	594533086	594533632	.	-	1	ID=TraesCS4A02G291500.1.cds1;Parent=TraesCS4A02G291500.1
TaGRF5-4A	chr4A	IWGSC_v1.1_201706	exon	594533802	594534120	.	-	.	ID=TraesCS4A02G291500.1.exon2;Parent=TraesCS4A02G291500.1
TaGRF5-4A	chr4A	IWGSC_v1.1_201706	CDS	594533802	594534120	.	-	2	ID=TraesCS4A02G291500.1.cds2;Parent=TraesCS4A02G291500.1
TaGRF5-4A	chr4A	IWGSC_v1.1_201706	CDS	594534587	594534775	.	-	2	ID=TraesCS4A02G291500.1.cds3;Parent=TraesCS4A02G291500.1
TaGRF5-4A	chr4A	IWGSC_v1.1_201706	exon	594534587	594534775	.	-	.	ID=TraesCS4A02G291500.1.exon3;Parent=TraesCS4A02G291500.1
TaGRF5-4A	chr4A	IWGSC_v1.1_201706	CDS	594535236	594535407	.	-	0	ID=TraesCS4A02G291500.1.cds4;Parent=TraesCS4A02G291500.1
TaGRF5-4A	chr4A	IWGSC_v1.1_201706	exon	594535236	594535533	.	-	.	ID=TraesCS4A02G291500.1.exon4;Parent=TraesCS4A02G291500.1
TaGRF5-4A	chr4A	IWGSC_v1.1_201706	five_prime_UTR	594535408	594535533	.	-	.	ID=TraesCS4A02G291500.1.utr5p1;Parent=TraesCS4A02G291500.1
TaGRF6-4A	chr4A	IWGSC_v1.1_201706	mRNA	705509912	705513259	.	-	.	ID=TraesCS4A02G434900.1;Parent=TraesCS4A02G434900;Note=TraesCS4A01G434900;secconf=HC1;Name=TraesCS4A02G434900.1;primconf=HC
TaGRF6-4A	chr4A	IWGSC_v1.1_201706	three_prime_UTR	705509912	705510261	.	-	.	ID=TraesCS4A02G434900.1.utr3p1;Parent=TraesCS4A02G434900.1
TaGRF6-4A	chr4A	IWGSC_v1.1_201706	exon	705509912	705510269	.	-	.	ID=TraesCS4A02G434900.1.exon1;Parent=TraesCS4A02G434900.1
TaGRF6-4A	chr4A	IWGSC_v1.1_201706	CDS	705510262	705510269	.	-	2	ID=TraesCS4A02G434900.1.cds1;Parent=TraesCS4A02G434900.1
TaGRF6-4A	chr4A	IWGSC_v1.1_201706	CDS	705510369	705510838	.	-	1	ID=TraesCS4A02G434900.1.cds2;Parent=TraesCS4A02G434900.1
TaGRF6-4A	chr4A	IWGSC_v1.1_201706	exon	705510369	705510838	.	-	.	ID=TraesCS4A02G434900.1.exon2;Parent=TraesCS4A02G434900.1
TaGRF6-4A	chr4A	IWGSC_v1.1_201706	CDS	705511916	705512258	.	-	2	ID=TraesCS4A02G434900.1.cds3;Parent=TraesCS4A02G434900.1
TaGRF6-4A	chr4A	IWGSC_v1.1_201706	exon	705511916	705512258	.	-	.	ID=TraesCS4A02G434900.1.exon3;Parent=TraesCS4A02G434900.1
TaGRF6-4A	chr4A	IWGSC_v1.1_201706	CDS	705512712	705513006	.	-	0	ID=TraesCS4A02G434900.1.cds4;Parent=TraesCS4A02G434900.1
TaGRF6-4A	chr4A	IWGSC_v1.1_201706	exon	705512712	705513259	.	-	.	ID=TraesCS4A02G434900.1.exon4;Parent=TraesCS4A02G434900.1
TaGRF6-4A	chr4A	IWGSC_v1.1_201706	five_prime_UTR	705513007	705513259	.	-	.	ID=TraesCS4A02G434900.1.utr5p1;Parent=TraesCS4A02G434900.1
TaGRF4-4B	chr4B	IWGSC_v1.1_201706	mRNA	51679625	51683720	.	+	.	ID=TraesCS4B02G060000.1;Parent=TraesCS4B02G060000;primconf=HC;secconf=HC1;Name=TraesCS4B02G060000.1;Note=TraesCS4B01G060000
TaGRF4-4B	chr4B	IWGSC_v1.1_201706	five_prime_UTR	51679625	51679925	.	+	.	ID=TraesCS4B02G060000.1.utr5p1;Parent=TraesCS4B02G060000.1
TaGRF4-4B	chr4B	IWGSC_v1.1_201706	exon	51679625	51680310	.	+	.	ID=TraesCS4B02G060000.1.exon1;Parent=TraesCS4B02G060000.1
TaGRF4-4B	chr4B	IWGSC_v1.1_201706	CDS	51679926	51680310	.	+	0	ID=TraesCS4B02G060000.1.cds1;Parent=TraesCS4B02G060000.1
TaGRF4-4B	chr4B	IWGSC_v1.1_201706	CDS	51681140	51681352	.	+	2	ID=TraesCS4B02G060000.1.cds2;Parent=TraesCS4B02G060000.1
TaGRF4-4B	chr4B	IWGSC_v1.1_201706	exon	51681140	51681352	.	+	.	ID=TraesCS4B02G060000.1.exon2;Parent=TraesCS4B02G060000.1
TaGRF4-4B	chr4B	IWGSC_v1.1_201706	CDS	51681505	51681865	.	+	2	ID=TraesCS4B02G060000.1.cds3;Parent=TraesCS4B02G060000.1
TaGRF4-4B	chr4B	IWGSC_v1.1_201706	exon	51681505	51681865	.	+	.	ID=TraesCS4B02G060000.1.exon3;Parent=TraesCS4B02G060000.1
TaGRF4-4B	chr4B	IWGSC_v1.1_201706	CDS	51682468	51683344	.	+	1	ID=TraesCS4B02G060000.1.cds4;Parent=TraesCS4B02G060000.1
TaGRF4-4B	chr4B	IWGSC_v1.1_201706	exon	51682468	51683720	.	+	.	ID=TraesCS4B02G060000.1.exon4;Parent=TraesCS4B02G060000.1
TaGRF4-4B	chr4B	IWGSC_v1.1_201706	three_prime_UTR	51683345	51683720	.	+	.	ID=TraesCS4B02G060000.1.utr3p1;Parent=TraesCS4B02G060000.1
TaGRF5-4D	chr4D	IWGSC_v1.1_201706	mRNA	8777205	8779937	.	+	.	ID=TraesCS4D02G020300.1;Parent=TraesCS4D02G020300;Note=TraesCS4D01G020300;secconf=HC1;Name=TraesCS4D02G020300.1;primconf=HC
TaGRF5-4D	chr4D	IWGSC_v1.1_201706	exon	8777205	8777249	.	+	.	ID=TraesCS4D02G020300.1.exon1;Parent=TraesCS4D02G020300.1
TaGRF5-4D	chr4D	IWGSC_v1.1_201706	CDS	8777205	8777249	.	+	0	ID=TraesCS4D02G020300.1.cds1;Parent=TraesCS4D02G020300.1
TaGRF5-4D	chr4D	IWGSC_v1.1_201706	exon	8777493	8777640	.	+	.	ID=TraesCS4D02G020300.1.exon2;Parent=TraesCS4D02G020300.1
TaGRF5-4D	chr4D	IWGSC_v1.1_201706	CDS	8777493	8777640	.	+	0	ID=TraesCS4D02G020300.1.cds2;Parent=TraesCS4D02G020300.1
TaGRF5-4D	chr4D	IWGSC_v1.1_201706	CDS	8778094	8778282	.	+	2	ID=TraesCS4D02G020300.1.cds3;Parent=TraesCS4D02G020300.1
TaGRF5-4D	chr4D	IWGSC_v1.1_201706	exon	8778094	8778282	.	+	.	ID=TraesCS4D02G020300.1.exon3;Parent=TraesCS4D02G020300.1
TaGRF5-4D	chr4D	IWGSC_v1.1_201706	exon	8778635	8778953	.	+	.	ID=TraesCS4D02G020300.1.exon4;Parent=TraesCS4D02G020300.1
TaGRF5-4D	chr4D	IWGSC_v1.1_201706	CDS	8778635	8778953	.	+	2	ID=TraesCS4D02G020300.1.cds4;Parent=TraesCS4D02G020300.1
TaGRF5-4D	chr4D	IWGSC_v1.1_201706	CDS	8779124	8779670	.	+	1	ID=TraesCS4D02G020300.1.cds5;Parent=TraesCS4D02G020300.1
TaGRF5-4D	chr4D	IWGSC_v1.1_201706	exon	8779124	8779937	.	+	.	ID=TraesCS4D02G020300.1.exon5;Parent=TraesCS4D02G020300.1
TaGRF5-4D	chr4D	IWGSC_v1.1_201706	three_prime_UTR	8779671	8779937	.	+	.	ID=TraesCS4D02G020300.1.utr3p1;Parent=TraesCS4D02G020300.1
TaGRF4-4D	chr4D	IWGSC_v1.1_201706	mRNA	35476875	35481038	.	+	.	ID=TraesCS4D02G059600.1;Parent=TraesCS4D02G059600;Note=TraesCS4D01G059600;secconf=HC1;Name=TraesCS4D02G059600.1;primconf=HC
TaGRF4-4D	chr4D	IWGSC_v1.1_201706	five_prime_UTR	35476875	35477170	.	+	.	ID=TraesCS4D02G059600.1.utr5p1;Parent=TraesCS4D02G059600.1
TaGRF4-4D	chr4D	IWGSC_v1.1_201706	exon	35476875	35477513	.	+	.	ID=TraesCS4D02G059600.1.exon1;Parent=TraesCS4D02G059600.1
TaGRF4-4D	chr4D	IWGSC_v1.1_201706	CDS	35477171	35477513	.	+	0	ID=TraesCS4D02G059600.1.cds1;Parent=TraesCS4D02G059600.1
TaGRF4-4D	chr4D	IWGSC_v1.1_201706	CDS	35478505	35478678	.	+	2	ID=TraesCS4D02G059600.1.cds2;Parent=TraesCS4D02G059600.1
TaGRF4-4D	chr4D	IWGSC_v1.1_201706	exon	35478505	35478678	.	+	.	ID=TraesCS4D02G059600.1.exon2;Parent=TraesCS4D02G059600.1
TaGRF4-4D	chr4D	IWGSC_v1.1_201706	CDS	35478825	35479179	.	+	2	ID=TraesCS4D02G059600.1.cds3;Parent=TraesCS4D02G059600.1
TaGRF4-4D	chr4D	IWGSC_v1.1_201706	exon	35478825	35479179	.	+	.	ID=TraesCS4D02G059600.1.exon3;Parent=TraesCS4D02G059600.1
TaGRF4-4D	chr4D	IWGSC_v1.1_201706	CDS	35479799	35480663	.	+	1	ID=TraesCS4D02G059600.1.cds4;Parent=TraesCS4D02G059600.1
TaGRF4-4D	chr4D	IWGSC_v1.1_201706	exon	35479799	35481038	.	+	.	ID=TraesCS4D02G059600.1.exon4;Parent=TraesCS4D02G059600.1
TaGRF4-4D	chr4D	IWGSC_v1.1_201706	three_prime_UTR	35480664	35481038	.	+	.	ID=TraesCS4D02G059600.1.utr3p1;Parent=TraesCS4D02G059600.1
TaGRF7-6A	chr6A	IWGSC_v1.1_201706	mRNA	188250927	188252018	.	-	.	ID=TraesCS6A02G174800.1;Parent=TraesCS6A02G174800;Note=TraesCS6A01G174800;secconf=HC2;Name=TraesCS6A02G174800.1;primconf=HC
TaGRF7-6A	chr6A	IWGSC_v1.1_201706	CDS	188250927	188251753	.	-	2	ID=TraesCS6A02G174800.1.cds1;Parent=TraesCS6A02G174800.1
TaGRF7-6A	chr6A	IWGSC_v1.1_201706	exon	188250927	188251753	.	-	.	ID=TraesCS6A02G174800.1.exon1;Parent=TraesCS6A02G174800.1
TaGRF7-6A	chr6A	IWGSC_v1.1_201706	CDS	188251859	188251979	.	-	0	ID=TraesCS6A02G174800.1.cds2;Parent=TraesCS6A02G174800.1
TaGRF7-6A	chr6A	IWGSC_v1.1_201706	exon	188251859	188252018	.	-	.	ID=TraesCS6A02G174800.1.exon2;Parent=TraesCS6A02G174800.1
TaGRF7-6A	chr6A	IWGSC_v1.1_201706	five_prime_UTR	188251980	188252018	.	-	.	ID=TraesCS6A02G174800.1.utr5p1;Parent=TraesCS6A02G174800.1
TaGRF8-6A	chr6A	IWGSC_v1.1_201706	mRNA	479833651	479834702	.	+	.	ID=TraesCS6A02G257600.1;Parent=TraesCS6A02G257600;Note=TraesCS6A01G257600;secconf=HC1;Name=TraesCS6A02G257600.1;primconf=HC
TaGRF8-6A	chr6A	IWGSC_v1.1_201706	five_prime_UTR	479833651	479833711	.	+	.	ID=TraesCS6A02G257600.1.utr5p1;Parent=TraesCS6A02G257600.1
TaGRF8-6A	chr6A	IWGSC_v1.1_201706	exon	479833651	479833790	.	+	.	ID=TraesCS6A02G257600.1.exon1;Parent=TraesCS6A02G257600.1
TaGRF8-6A	chr6A	IWGSC_v1.1_201706	CDS	479833712	479833790	.	+	0	ID=TraesCS6A02G257600.1.cds1;Parent=TraesCS6A02G257600.1
TaGRF8-6A	chr6A	IWGSC_v1.1_201706	CDS	479833888	479834151	.	+	2	ID=TraesCS6A02G257600.1.cds2;Parent=TraesCS6A02G257600.1
TaGRF8-6A	chr6A	IWGSC_v1.1_201706	exon	479833888	479834151	.	+	.	ID=TraesCS6A02G257600.1.exon2;Parent=TraesCS6A02G257600.1
TaGRF8-6A	chr6A	IWGSC_v1.1_201706	CDS	479834232	479834527	.	+	2	ID=TraesCS6A02G257600.1.cds3;Parent=TraesCS6A02G257600.1
TaGRF8-6A	chr6A	IWGSC_v1.1_201706	exon	479834232	479834702	.	+	.	ID=TraesCS6A02G257600.1.exon3;Parent=TraesCS6A02G257600.1
TaGRF8-6A	chr6A	IWGSC_v1.1_201706	three_prime_UTR	479834528	479834702	.	+	.	ID=TraesCS6A02G257600.1.utr3p1;Parent=TraesCS6A02G257600.1
TaGRF9-6A	chr6A	IWGSC_v1.1_201706	mRNA	496010434	496017229	.	-	.	ID=TraesCS6A02G269600.1;Parent=TraesCS6A02G269600;Note=TraesCS6A01G269600;secconf=HC1;Name=TraesCS6A02G269600.1;primconf=HC
TaGRF9-6A	chr6A	IWGSC_v1.1_201706	three_prime_UTR	496010434	496010716	.	-	.	ID=TraesCS6A02G269600.1.utr3p1;Parent=TraesCS6A02G269600.1
TaGRF9-6A	chr6A	IWGSC_v1.1_201706	exon	496010434	496011200	.	-	.	ID=TraesCS6A02G269600.1.exon1;Parent=TraesCS6A02G269600.1
TaGRF9-6A	chr6A	IWGSC_v1.1_201706	CDS	496010717	496011200	.	-	1	ID=TraesCS6A02G269600.1.cds1;Parent=TraesCS6A02G269600.1
TaGRF9-6A	chr6A	IWGSC_v1.1_201706	CDS	496015679	496016093	.	-	2	ID=TraesCS6A02G269600.1.cds2;Parent=TraesCS6A02G269600.1
TaGRF9-6A	chr6A	IWGSC_v1.1_201706	exon	496015679	496016093	.	-	.	ID=TraesCS6A02G269600.1.exon2;Parent=TraesCS6A02G269600.1
TaGRF9-6A	chr6A	IWGSC_v1.1_201706	CDS	496016630	496016847	.	-	1	ID=TraesCS6A02G269600.1.cds3;Parent=TraesCS6A02G269600.1
TaGRF9-6A	chr6A	IWGSC_v1.1_201706	exon	496016630	496016847	.	-	.	ID=TraesCS6A02G269600.1.exon3;Parent=TraesCS6A02G269600.1
TaGRF9-6A	chr6A	IWGSC_v1.1_201706	CDS	496016944	496017053	.	-	0	ID=TraesCS6A02G269600.1.cds4;Parent=TraesCS6A02G269600.1
TaGRF9-6A	chr6A	IWGSC_v1.1_201706	exon	496016944	496017229	.	-	.	ID=TraesCS6A02G269600.1.exon4;Parent=TraesCS6A02G269600.1
TaGRF9-6A	chr6A	IWGSC_v1.1_201706	five_prime_UTR	496017054	496017229	.	-	.	ID=TraesCS6A02G269600.1.utr5p1;Parent=TraesCS6A02G269600.1
TaGRF10-6A	chr6A	IWGSC_v1.1_201706	mRNA	568515906	568517951	.	-	.	ID=TraesCS6A02G335900.1;Parent=TraesCS6A02G335900;Note=TraesCS6A01G335900;secconf=HC1;Name=TraesCS6A02G335900.1;primconf=HC
TaGRF10-6A	chr6A	IWGSC_v1.1_201706	three_prime_UTR	568515906	568516361	.	-	.	ID=TraesCS6A02G335900.1.utr3p1;Parent=TraesCS6A02G335900.1
TaGRF10-6A	chr6A	IWGSC_v1.1_201706	exon	568515906	568516369	.	-	.	ID=TraesCS6A02G335900.1.exon1;Parent=TraesCS6A02G335900.1
TaGRF10-6A	chr6A	IWGSC_v1.1_201706	CDS	568516362	568516369	.	-	2	ID=TraesCS6A02G335900.1.cds1;Parent=TraesCS6A02G335900.1
TaGRF10-6A	chr6A	IWGSC_v1.1_201706	CDS	568516455	568517444	.	-	2	ID=TraesCS6A02G335900.1.cds2;Parent=TraesCS6A02G335900.1
TaGRF10-6A	chr6A	IWGSC_v1.1_201706	exon	568516455	568517444	.	-	.	ID=TraesCS6A02G335900.1.exon2;Parent=TraesCS6A02G335900.1
TaGRF10-6A	chr6A	IWGSC_v1.1_201706	CDS	568517555	568517786	.	-	0	ID=TraesCS6A02G335900.1.cds3;Parent=TraesCS6A02G335900.1
TaGRF10-6A	chr6A	IWGSC_v1.1_201706	exon	568517555	568517951	.	-	.	ID=TraesCS6A02G335900.1.exon3;Parent=TraesCS6A02G335900.1
TaGRF10-6A	chr6A	IWGSC_v1.1_201706	five_prime_UTR	568517787	568517951	.	-	.	ID=TraesCS6A02G335900.1.utr5p1;Parent=TraesCS6A02G335900.1
TaGRF8-6B	chr6B	IWGSC_v1.1_201706	mRNA	481089083	481090143	.	-	.	ID=TraesCS6B02G267500.1;Parent=TraesCS6B02G267500;Name=TraesCS6B02G267500.1;Note=TraesCS6B01G267500;secconf=HC1;primconf=HC
TaGRF8-6B	chr6B	IWGSC_v1.1_201706	three_prime_UTR	481089083	481089277	.	-	.	ID=TraesCS6B02G267500.1.utr3p1;Parent=TraesCS6B02G267500.1
TaGRF8-6B	chr6B	IWGSC_v1.1_201706	exon	481089083	481089561	.	-	.	ID=TraesCS6B02G267500.1.exon1;Parent=TraesCS6B02G267500.1
TaGRF8-6B	chr6B	IWGSC_v1.1_201706	CDS	481089278	481089561	.	-	2	ID=TraesCS6B02G267500.1.cds1;Parent=TraesCS6B02G267500.1
TaGRF8-6B	chr6B	IWGSC_v1.1_201706	CDS	481089641	481089913	.	-	2	ID=TraesCS6B02G267500.1.cds2;Parent=TraesCS6B02G267500.1
TaGRF8-6B	chr6B	IWGSC_v1.1_201706	exon	481089641	481089913	.	-	.	ID=TraesCS6B02G267500.1.exon2;Parent=TraesCS6B02G267500.1
TaGRF8-6B	chr6B	IWGSC_v1.1_201706	CDS	481090008	481090086	.	-	0	ID=TraesCS6B02G267500.1.cds3;Parent=TraesCS6B02G267500.1
TaGRF8-6B	chr6B	IWGSC_v1.1_201706	exon	481090008	481090143	.	-	.	ID=TraesCS6B02G267500.1.exon3;Parent=TraesCS6B02G267500.1
TaGRF8-6B	chr6B	IWGSC_v1.1_201706	five_prime_UTR	481090087	481090143	.	-	.	ID=TraesCS6B02G267500.1.utr5p1;Parent=TraesCS6B02G267500.1
TaGRF9-6B	chr6B	IWGSC_v1.1_201706	mRNA	532899954	532903804	.	-	.	ID=TraesCS6B02G296900.1;Parent=TraesCS6B02G296900;Name=TraesCS6B02G296900.1;Note=TraesCS6B01G296900;secconf=HC1;primconf=HC
TaGRF9-6B	chr6B	IWGSC_v1.1_201706	three_prime_UTR	532899954	532900262	.	-	.	ID=TraesCS6B02G296900.1.utr3p1;Parent=TraesCS6B02G296900.1
TaGRF9-6B	chr6B	IWGSC_v1.1_201706	exon	532899954	532900758	.	-	.	ID=TraesCS6B02G296900.1.exon1;Parent=TraesCS6B02G296900.1
TaGRF9-6B	chr6B	IWGSC_v1.1_201706	CDS	532900263	532900758	.	-	1	ID=TraesCS6B02G296900.1.cds1;Parent=TraesCS6B02G296900.1
TaGRF9-6B	chr6B	IWGSC_v1.1_201706	CDS	532902222	532902627	.	-	2	ID=TraesCS6B02G296900.1.cds2;Parent=TraesCS6B02G296900.1
TaGRF9-6B	chr6B	IWGSC_v1.1_201706	exon	532902222	532902627	.	-	.	ID=TraesCS6B02G296900.1.exon2;Parent=TraesCS6B02G296900.1
TaGRF9-6B	chr6B	IWGSC_v1.1_201706	CDS	532903117	532903331	.	-	1	ID=TraesCS6B02G296900.1.cds3;Parent=TraesCS6B02G296900.1
TaGRF9-6B	chr6B	IWGSC_v1.1_201706	exon	532903117	532903331	.	-	.	ID=TraesCS6B02G296900.1.exon3;Parent=TraesCS6B02G296900.1
TaGRF9-6B	chr6B	IWGSC_v1.1_201706	CDS	532903425	532903528	.	-	0	ID=TraesCS6B02G296900.1.cds4;Parent=TraesCS6B02G296900.1
TaGRF9-6B	chr6B	IWGSC_v1.1_201706	exon	532903425	532903804	.	-	.	ID=TraesCS6B02G296900.1.exon4;Parent=TraesCS6B02G296900.1
TaGRF9-6B	chr6B	IWGSC_v1.1_201706	five_prime_UTR	532903529	532903804	.	-	.	ID=TraesCS6B02G296900.1.utr5p1;Parent=TraesCS6B02G296900.1
TaGRF10-6B	chr6B	IWGSC_v1.1_201706	mRNA	639532839	639534932	.	-	.	ID=TraesCS6B02G366700.1;Parent=TraesCS6B02G366700;Name=TraesCS6B02G366700.1;Note=TraesCS6B01G366700;secconf=HC1;primconf=HC
TaGRF10-6B	chr6B	IWGSC_v1.1_201706	three_prime_UTR	639532839	639533338	.	-	.	ID=TraesCS6B02G366700.1.utr3p1;Parent=TraesCS6B02G366700.1
TaGRF10-6B	chr6B	IWGSC_v1.1_201706	exon	639532839	639533346	.	-	.	ID=TraesCS6B02G366700.1.exon1;Parent=TraesCS6B02G366700.1
TaGRF10-6B	chr6B	IWGSC_v1.1_201706	CDS	639533339	639533346	.	-	2	ID=TraesCS6B02G366700.1.cds1;Parent=TraesCS6B02G366700.1
TaGRF10-6B	chr6B	IWGSC_v1.1_201706	exon	639533433	639534425	.	-	.	ID=TraesCS6B02G366700.1.exon2;Parent=TraesCS6B02G366700.1
TaGRF10-6B	chr6B	IWGSC_v1.1_201706	CDS	639533433	639534425	.	-	2	ID=TraesCS6B02G366700.1.cds2;Parent=TraesCS6B02G366700.1
TaGRF10-6B	chr6B	IWGSC_v1.1_201706	CDS	639534538	639534769	.	-	0	ID=TraesCS6B02G366700.1.cds3;Parent=TraesCS6B02G366700.1
TaGRF10-6B	chr6B	IWGSC_v1.1_201706	exon	639534538	639534932	.	-	.	ID=TraesCS6B02G366700.1.exon3;Parent=TraesCS6B02G366700.1
TaGRF10-6B	chr6B	IWGSC_v1.1_201706	five_prime_UTR	639534770	639534932	.	-	.	ID=TraesCS6B02G366700.1.utr5p1;Parent=TraesCS6B02G366700.1
TaGRF8-6D	chr6D	IWGSC_v1.1_201706	mRNA	339389350	339390413	.	+	.	ID=TraesCS6D02G238900.1;Parent=TraesCS6D02G238900;Name=TraesCS6D02G238900.1;Note=TraesCS6D01G238900;secconf=HC1;primconf=HC
TaGRF8-6D	chr6D	IWGSC_v1.1_201706	five_prime_UTR	339389350	339389419	.	+	.	ID=TraesCS6D02G238900.1.utr5p1;Parent=TraesCS6D02G238900.1
TaGRF8-6D	chr6D	IWGSC_v1.1_201706	exon	339389350	339389498	.	+	.	ID=TraesCS6D02G238900.1.exon1;Parent=TraesCS6D02G238900.1
TaGRF8-6D	chr6D	IWGSC_v1.1_201706	CDS	339389420	339389498	.	+	0	ID=TraesCS6D02G238900.1.cds1;Parent=TraesCS6D02G238900.1
TaGRF8-6D	chr6D	IWGSC_v1.1_201706	exon	339389593	339389865	.	+	.	ID=TraesCS6D02G238900.1.exon2;Parent=TraesCS6D02G238900.1
TaGRF8-6D	chr6D	IWGSC_v1.1_201706	CDS	339389593	339389865	.	+	2	ID=TraesCS6D02G238900.1.cds2;Parent=TraesCS6D02G238900.1
TaGRF8-6D	chr6D	IWGSC_v1.1_201706	CDS	339389970	339390265	.	+	2	ID=TraesCS6D02G238900.1.cds3;Parent=TraesCS6D02G238900.1
TaGRF8-6D	chr6D	IWGSC_v1.1_201706	exon	339389970	339390413	.	+	.	ID=TraesCS6D02G238900.1.exon3;Parent=TraesCS6D02G238900.1
TaGRF8-6D	chr6D	IWGSC_v1.1_201706	three_prime_UTR	339390266	339390413	.	+	.	ID=TraesCS6D02G238900.1.utr3p1;Parent=TraesCS6D02G238900.1
TaGRF9-6D	chr6D	IWGSC_v1.1_201706	mRNA	347433246	347436961	.	+	.	ID=TraesCS6D02G245300.1;Parent=TraesCS6D02G245300;Name=TraesCS6D02G245300.1;Note=TraesCS6D01G245300;secconf=HC1;primconf=HC
TaGRF9-6D	chr6D	IWGSC_v1.1_201706	five_prime_UTR	347433246	347433394	.	+	.	ID=TraesCS6D02G245300.1.utr5p1;Parent=TraesCS6D02G245300.1
TaGRF9-6D	chr6D	IWGSC_v1.1_201706	exon	347433246	347433498	.	+	.	ID=TraesCS6D02G245300.1.exon1;Parent=TraesCS6D02G245300.1
TaGRF9-6D	chr6D	IWGSC_v1.1_201706	CDS	347433395	347433498	.	+	0	ID=TraesCS6D02G245300.1.cds1;Parent=TraesCS6D02G245300.1
TaGRF9-6D	chr6D	IWGSC_v1.1_201706	CDS	347433594	347433814	.	+	1	ID=TraesCS6D02G245300.1.cds2;Parent=TraesCS6D02G245300.1
TaGRF9-6D	chr6D	IWGSC_v1.1_201706	exon	347433594	347433814	.	+	.	ID=TraesCS6D02G245300.1.exon2;Parent=TraesCS6D02G245300.1
TaGRF9-6D	chr6D	IWGSC_v1.1_201706	CDS	347434318	347434732	.	+	2	ID=TraesCS6D02G245300.1.cds3;Parent=TraesCS6D02G245300.1
TaGRF9-6D	chr6D	IWGSC_v1.1_201706	exon	347434318	347434732	.	+	.	ID=TraesCS6D02G245300.1.exon3;Parent=TraesCS6D02G245300.1
TaGRF9-6D	chr6D	IWGSC_v1.1_201706	CDS	347436183	347436672	.	+	1	ID=TraesCS6D02G245300.1.cds4;Parent=TraesCS6D02G245300.1
TaGRF9-6D	chr6D	IWGSC_v1.1_201706	exon	347436183	347436961	.	+	.	ID=TraesCS6D02G245300.1.exon4;Parent=TraesCS6D02G245300.1
TaGRF9-6D	chr6D	IWGSC_v1.1_201706	three_prime_UTR	347436673	347436961	.	+	.	ID=TraesCS6D02G245300.1.utr3p1;Parent=TraesCS6D02G245300.1
TaGRF10-6D	chr6D	IWGSC_v1.1_201706	mRNA	423814859	423816885	.	-	.	ID=TraesCS6D02G315700.1;Parent=TraesCS6D02G315700;Name=TraesCS6D02G315700.1;Note=TraesCS6D01G315700;secconf=HC1;primconf=HC
TaGRF10-6D	chr6D	IWGSC_v1.1_201706	three_prime_UTR	423814859	423815290	.	-	.	ID=TraesCS6D02G315700.1.utr3p1;Parent=TraesCS6D02G315700.1
TaGRF10-6D	chr6D	IWGSC_v1.1_201706	exon	423814859	423815298	.	-	.	ID=TraesCS6D02G315700.1.exon1;Parent=TraesCS6D02G315700.1
TaGRF10-6D	chr6D	IWGSC_v1.1_201706	CDS	423815291	423815298	.	-	2	ID=TraesCS6D02G315700.1.cds1;Parent=TraesCS6D02G315700.1
TaGRF10-6D	chr6D	IWGSC_v1.1_201706	CDS	423815381	423816385	.	-	2	ID=TraesCS6D02G315700.1.cds2;Parent=TraesCS6D02G315700.1
TaGRF10-6D	chr6D	IWGSC_v1.1_201706	exon	423815381	423816385	.	-	.	ID=TraesCS6D02G315700.1.exon2;Parent=TraesCS6D02G315700.1
TaGRF10-6D	chr6D	IWGSC_v1.1_201706	CDS	423816495	423816726	.	-	0	ID=TraesCS6D02G315700.1.cds3;Parent=TraesCS6D02G315700.1
TaGRF10-6D	chr6D	IWGSC_v1.1_201706	exon	423816495	423816885	.	-	.	ID=TraesCS6D02G315700.1.exon3;Parent=TraesCS6D02G315700.1
TaGRF10-6D	chr6D	IWGSC_v1.1_201706	five_prime_UTR	423816727	423816885	.	-	.	ID=TraesCS6D02G315700.1.utr5p1;Parent=TraesCS6D02G315700.1
TaGRF11-7A	chr7A	IWGSC_v1.1_201706	mRNA	22937762	22940558	56	-	.	ID=TraesCS7A02G049100.1;Parent=TraesCS7A02G049100;primconf=HC;secconf=HC1;Note=TraesCS7A01G049100;Name=TraesCS7A02G049100.1
TaGRF11-7A	chr7A	IWGSC_v1.1_201706	exon	22937762	22937769	.	-	.	ID=TraesCS7A02G049100.1.exon1;Parent=TraesCS7A02G049100.1
TaGRF11-7A	chr7A	IWGSC_v1.1_201706	CDS	22937762	22937769	.	-	2	ID=TraesCS7A02G049100.1.cds1;Parent=TraesCS7A02G049100.1
TaGRF11-7A	chr7A	IWGSC_v1.1_201706	CDS	22937873	22938339	.	-	1	ID=TraesCS7A02G049100.1.cds2;Parent=TraesCS7A02G049100.1
TaGRF11-7A	chr7A	IWGSC_v1.1_201706	exon	22937873	22938339	.	-	.	ID=TraesCS7A02G049100.1.exon2;Parent=TraesCS7A02G049100.1
TaGRF11-7A	chr7A	IWGSC_v1.1_201706	exon	22939410	22939752	.	-	.	ID=TraesCS7A02G049100.1.exon3;Parent=TraesCS7A02G049100.1
TaGRF11-7A	chr7A	IWGSC_v1.1_201706	CDS	22939410	22939752	.	-	2	ID=TraesCS7A02G049100.1.cds3;Parent=TraesCS7A02G049100.1
TaGRF11-7A	chr7A	IWGSC_v1.1_201706	exon	22940264	22940558	.	-	.	ID=TraesCS7A02G049100.1.exon4;Parent=TraesCS7A02G049100.1
TaGRF11-7A	chr7A	IWGSC_v1.1_201706	CDS	22940264	22940558	.	-	0	ID=TraesCS7A02G049100.1.cds4;Parent=TraesCS7A02G049100.1
TaGRF12-7A	chr7A	IWGSC_v1.1_201706	mRNA	121056090	121057606	.	+	.	ID=TraesCS7A02G165600.1;Parent=TraesCS7A02G165600;primconf=HC;secconf=HC1;Note=TraesCS7A01G165600;Name=TraesCS7A02G165600.1
TaGRF12-7A	chr7A	IWGSC_v1.1_201706	five_prime_UTR	121056090	121056252	.	+	.	ID=TraesCS7A02G165600.1.utr5p1;Parent=TraesCS7A02G165600.1
TaGRF12-7A	chr7A	IWGSC_v1.1_201706	exon	121056090	121056472	.	+	.	ID=TraesCS7A02G165600.1.exon1;Parent=TraesCS7A02G165600.1
TaGRF12-7A	chr7A	IWGSC_v1.1_201706	CDS	121056253	121056472	.	+	0	ID=TraesCS7A02G165600.1.cds1;Parent=TraesCS7A02G165600.1
TaGRF12-7A	chr7A	IWGSC_v1.1_201706	CDS	121056604	121057305	.	+	2	ID=TraesCS7A02G165600.1.cds2;Parent=TraesCS7A02G165600.1
TaGRF12-7A	chr7A	IWGSC_v1.1_201706	exon	121056604	121057305	.	+	.	ID=TraesCS7A02G165600.1.exon2;Parent=TraesCS7A02G165600.1
TaGRF12-7A	chr7A	IWGSC_v1.1_201706	CDS	121057409	121057416	.	+	2	ID=TraesCS7A02G165600.1.cds3;Parent=TraesCS7A02G165600.1
TaGRF12-7A	chr7A	IWGSC_v1.1_201706	exon	121057409	121057606	.	+	.	ID=TraesCS7A02G165600.1.exon3;Parent=TraesCS7A02G165600.1
TaGRF12-7A	chr7A	IWGSC_v1.1_201706	three_prime_UTR	121057417	121057606	.	+	.	ID=TraesCS7A02G165600.1.utr3p1;Parent=TraesCS7A02G165600.1
TaGRF12-7B	chr7B	IWGSC_v1.1_201706	mRNA	76903837	76905287	.	+	.	ID=TraesCS7B02G070200.1;Parent=TraesCS7B02G070200;secconf=HC1;Note=TraesCS7B01G070200;Name=TraesCS7B02G070200.1;primconf=HC
TaGRF12-7B	chr7B	IWGSC_v1.1_201706	five_prime_UTR	76903837	76903924	.	+	.	ID=TraesCS7B02G070200.1.utr5p1;Parent=TraesCS7B02G070200.1
TaGRF12-7B	chr7B	IWGSC_v1.1_201706	exon	76903837	76904147	.	+	.	ID=TraesCS7B02G070200.1.exon1;Parent=TraesCS7B02G070200.1
TaGRF12-7B	chr7B	IWGSC_v1.1_201706	CDS	76903925	76904147	.	+	0	ID=TraesCS7B02G070200.1.cds1;Parent=TraesCS7B02G070200.1
TaGRF12-7B	chr7B	IWGSC_v1.1_201706	exon	76904284	76905003	.	+	.	ID=TraesCS7B02G070200.1.exon2;Parent=TraesCS7B02G070200.1
TaGRF12-7B	chr7B	IWGSC_v1.1_201706	CDS	76904284	76905003	.	+	2	ID=TraesCS7B02G070200.1.cds2;Parent=TraesCS7B02G070200.1
TaGRF12-7B	chr7B	IWGSC_v1.1_201706	CDS	76905089	76905096	.	+	2	ID=TraesCS7B02G070200.1.cds3;Parent=TraesCS7B02G070200.1
TaGRF12-7B	chr7B	IWGSC_v1.1_201706	exon	76905089	76905287	.	+	.	ID=TraesCS7B02G070200.1.exon3;Parent=TraesCS7B02G070200.1
TaGRF12-7B	chr7B	IWGSC_v1.1_201706	three_prime_UTR	76905097	76905287	.	+	.	ID=TraesCS7B02G070200.1.utr3p1;Parent=TraesCS7B02G070200.1
TaGRF11-7D	chr7D	IWGSC_v1.1_201706	mRNA	22586526	22589173	59	-	.	ID=TraesCS7D02G044200.1;Parent=TraesCS7D02G044200;primconf=HC;Note=TraesCS7D01G044200;Name=TraesCS7D02G044200.1;secconf=HC1
TaGRF11-7D	chr7D	IWGSC_v1.1_201706	CDS	22586526	22586533	.	-	2	ID=TraesCS7D02G044200.1.cds1;Parent=TraesCS7D02G044200.1
TaGRF11-7D	chr7D	IWGSC_v1.1_201706	exon	22586526	22586533	.	-	.	ID=TraesCS7D02G044200.1.exon1;Parent=TraesCS7D02G044200.1
TaGRF11-7D	chr7D	IWGSC_v1.1_201706	CDS	22586618	22587084	.	-	1	ID=TraesCS7D02G044200.1.cds2;Parent=TraesCS7D02G044200.1
TaGRF11-7D	chr7D	IWGSC_v1.1_201706	exon	22586618	22587084	.	-	.	ID=TraesCS7D02G044200.1.exon2;Parent=TraesCS7D02G044200.1
TaGRF11-7D	chr7D	IWGSC_v1.1_201706	CDS	22588102	22588444	.	-	2	ID=TraesCS7D02G044200.1.cds3;Parent=TraesCS7D02G044200.1
TaGRF11-7D	chr7D	IWGSC_v1.1_201706	exon	22588102	22588444	.	-	.	ID=TraesCS7D02G044200.1.exon3;Parent=TraesCS7D02G044200.1
TaGRF11-7D	chr7D	IWGSC_v1.1_201706	CDS	22588885	22589173	.	-	0	ID=TraesCS7D02G044200.1.cds4;Parent=TraesCS7D02G044200.1
TaGRF11-7D	chr7D	IWGSC_v1.1_201706	exon	22588885	22589173	.	-	.	ID=TraesCS7D02G044200.1.exon4;Parent=TraesCS7D02G044200.1
TaGRF12-7D	chr7D	IWGSC_v1.1_201706	mRNA	117132680	117134270	.	+	.	ID=TraesCS7D02G166400.1;Parent=TraesCS7D02G166400;primconf=HC;Note=TraesCS7D01G166400;Name=TraesCS7D02G166400.1;secconf=HC1
TaGRF12-7D	chr7D	IWGSC_v1.1_201706	five_prime_UTR	117132680	117132772	.	+	.	ID=TraesCS7D02G166400.1.utr5p1;Parent=TraesCS7D02G166400.1
TaGRF12-7D	chr7D	IWGSC_v1.1_201706	exon	117132680	117132995	.	+	.	ID=TraesCS7D02G166400.1.exon1;Parent=TraesCS7D02G166400.1
TaGRF12-7D	chr7D	IWGSC_v1.1_201706	CDS	117132773	117132995	.	+	0	ID=TraesCS7D02G166400.1.cds1;Parent=TraesCS7D02G166400.1
TaGRF12-7D	chr7D	IWGSC_v1.1_201706	CDS	117133118	117133849	.	+	2	ID=TraesCS7D02G166400.1.cds2;Parent=TraesCS7D02G166400.1
TaGRF12-7D	chr7D	IWGSC_v1.1_201706	exon	117133118	117133849	.	+	.	ID=TraesCS7D02G166400.1.exon2;Parent=TraesCS7D02G166400.1
TaGRF12-7D	chr7D	IWGSC_v1.1_201706	CDS	117133952	117133959	.	+	2	ID=TraesCS7D02G166400.1.cds3;Parent=TraesCS7D02G166400.1
TaGRF12-7D	chr7D	IWGSC_v1.1_201706	exon	117133952	117134270	.	+	.	ID=TraesCS7D02G166400.1.exon3;Parent=TraesCS7D02G166400.1
TaGRF12-7D	chr7D	IWGSC_v1.1_201706	three_prime_UTR	117133960	117134270	.	+	.	ID=TraesCS7D02G166400.1.utr3p1;Parent=TraesCS7D02G166400.1
TdGRF1	2A	wewseq	mRNA	305521133	305523679	.	+	.	ID=transcript:TRIDC2AG032100.1;Parent=gene:TRIDC2AG032100;biotype=protein_coding;transcript_id=TRIDC2AG032100.1
TdGRF1	2A	wewseq	exon	305521133	305521481	.	+	.	Parent=transcript:TRIDC2AG032100.1;Name=TRIDC2AG032100.1-E1;constitutive=0;ensembl_end_phase=1;ensembl_phase=0;exon_id=TRIDC2AG032100.1-E1;rank=1
TdGRF1	2A	wewseq	CDS	305521133	305521481	.	+	0	ID=CDS:TRIDC2AG032100.1;Parent=transcript:TRIDC2AG032100.1;protein_id=TRIDC2AG032100.1
TdGRF1	2A	wewseq	exon	305522301	305522525	.	+	.	Parent=transcript:TRIDC2AG032100.1;Name=TRIDC2AG032100.1-E2;constitutive=0;ensembl_end_phase=1;ensembl_phase=1;exon_id=TRIDC2AG032100.1-E2;rank=2
TdGRF1	2A	wewseq	CDS	305522301	305522525	.	+	2	ID=CDS:TRIDC2AG032100.1;Parent=transcript:TRIDC2AG032100.1;protein_id=TRIDC2AG032100.1
TdGRF1	2A	wewseq	CDS	305522827	305523143	.	+	2	ID=CDS:TRIDC2AG032100.1;Parent=transcript:TRIDC2AG032100.1;protein_id=TRIDC2AG032100.1
TdGRF1	2A	wewseq	exon	305522827	305523679	.	+	.	Parent=transcript:TRIDC2AG032100.1;Name=TRIDC2AG032100.1-E3;constitutive=0;ensembl_end_phase=-1;ensembl_phase=1;exon_id=TRIDC2AG032100.1-E3;rank=3
TdGRF1	2A	wewseq	three_prime_UTR	305523144	305523679	.	+	.	Parent=transcript:TRIDC2AG032100.1
TdGRF1	2A	wewseq	exon	305522827	305523679	.	+	.	Parent=transcript:TRIDC2AG032100.2;Name=TRIDC2AG032100.1-E3;constitutive=0;ensembl_end_phase=-1;ensembl_phase=1;exon_id=TRIDC2AG032100.1-E3;rank=2
TdGRF1	2A	wewseq	exon	305522301	305522525	.	+	.	Parent=transcript:TRIDC2AG032100.3;Name=TRIDC2AG032100.1-E2;constitutive=0;ensembl_end_phase=1;ensembl_phase=1;exon_id=TRIDC2AG032100.1-E2;rank=2
TdGRF1	2A	wewseq	exon	305522301	305522525	.	+	.	Parent=transcript:TRIDC2AG032100.4;Name=TRIDC2AG032100.1-E2;constitutive=0;ensembl_end_phase=1;ensembl_phase=1;exon_id=TRIDC2AG032100.1-E2;rank=2
TdGRF2	2A	wewseq	mRNA	645824074	645824973	.	-	.	ID=transcript:TRIDC2AG057630.1;Parent=gene:TRIDC2AG057630;biotype=protein_coding;transcript_id=TRIDC2AG057630.1
TdGRF2	2A	wewseq	exon	645824074	645824402	.	-	.	Parent=transcript:TRIDC2AG057630.1;Name=TRIDC2AG057630.3-E3;constitutive=0;ensembl_end_phase=0;ensembl_phase=1;exon_id=TRIDC2AG057630.3-E3;rank=3
TdGRF2	2A	wewseq	CDS	645824074	645824402	.	-	2	ID=CDS:TRIDC2AG057630.1;Parent=transcript:TRIDC2AG057630.1;protein_id=TRIDC2AG057630.1
TdGRF2	2A	wewseq	exon	645824532	645824807	.	-	.	Parent=transcript:TRIDC2AG057630.1;Name=TRIDC2AG057630.3-E2;constitutive=0;ensembl_end_phase=1;ensembl_phase=1;exon_id=TRIDC2AG057630.3-E2;rank=2
TdGRF2	2A	wewseq	CDS	645824532	645824807	.	-	2	ID=CDS:TRIDC2AG057630.1;Parent=transcript:TRIDC2AG057630.1;protein_id=TRIDC2AG057630.1
TdGRF2	2A	wewseq	CDS	645824891	645824906	.	-	0	ID=CDS:TRIDC2AG057630.1;Parent=transcript:TRIDC2AG057630.1;protein_id=TRIDC2AG057630.1
TdGRF2	2A	wewseq	exon	645824891	645824973	.	-	.	Parent=transcript:TRIDC2AG057630.1;Name=TRIDC2AG057630.1-E1;constitutive=0;ensembl_end_phase=1;ensembl_phase=-1;exon_id=TRIDC2AG057630.1-E1;rank=1
TdGRF2	2A	wewseq	five_prime_UTR	645824907	645824973	.	-	.	Parent=transcript:TRIDC2AG057630.1
TdGRF3	2A	wewseq	mRNA	680343673	680346875	.	+	.	ID=transcript:TRIDC2AG062550.2;Parent=gene:TRIDC2AG062550;biotype=protein_coding;transcript_id=TRIDC2AG062550.2
TdGRF3	2A	wewseq	exon	680343673	680343782	.	+	.	Parent=transcript:TRIDC2AG062550.2;Name=TRIDC2AG062550.2-E1;constitutive=0;ensembl_end_phase=2;ensembl_phase=0;exon_id=TRIDC2AG062550.2-E1;rank=1
TdGRF3	2A	wewseq	CDS	680343673	680343782	.	+	0	ID=CDS:TRIDC2AG062550.2;Parent=transcript:TRIDC2AG062550.2;protein_id=TRIDC2AG062550.2
TdGRF3	2A	wewseq	exon	680343917	680344131	.	+	.	Parent=transcript:TRIDC2AG062550.2;Name=TRIDC2AG062550.2-E2;constitutive=0;ensembl_end_phase=1;ensembl_phase=2;exon_id=TRIDC2AG062550.2-E2;rank=2
TdGRF3	2A	wewseq	CDS	680343917	680344131	.	+	1	ID=CDS:TRIDC2AG062550.2;Parent=transcript:TRIDC2AG062550.2;protein_id=TRIDC2AG062550.2
TdGRF3	2A	wewseq	exon	680344981	680345344	.	+	.	Parent=transcript:TRIDC2AG062550.2;Name=TRIDC2AG062550.3-E3;constitutive=0;ensembl_end_phase=2;ensembl_phase=1;exon_id=TRIDC2AG062550.3-E3;rank=3
TdGRF3	2A	wewseq	CDS	680344981	680345344	.	+	2	ID=CDS:TRIDC2AG062550.2;Parent=transcript:TRIDC2AG062550.2;protein_id=TRIDC2AG062550.2
TdGRF3	2A	wewseq	CDS	680346168	680346210	.	+	1	ID=CDS:TRIDC2AG062550.2;Parent=transcript:TRIDC2AG062550.2;protein_id=TRIDC2AG062550.2
TdGRF3	2A	wewseq	exon	680346168	680346212	.	+	.	Parent=transcript:TRIDC2AG062550.2;Name=TRIDC2AG062550.2-E4;constitutive=0;ensembl_end_phase=-1;ensembl_phase=2;exon_id=TRIDC2AG062550.2-E4;rank=4
TdGRF3	2A	wewseq	three_prime_UTR	680346211	680346212	.	+	.	Parent=transcript:TRIDC2AG062550.2
TdGRF3	2A	wewseq	exon	680346403	680346875	.	+	.	Parent=transcript:TRIDC2AG062550.2;Name=TRIDC2AG062550.2-E5;constitutive=0;ensembl_end_phase=-1;ensembl_phase=-1;exon_id=TRIDC2AG062550.2-E5;rank=5
TdGRF3	2A	wewseq	three_prime_UTR	680346403	680346875	.	+	.	Parent=transcript:TRIDC2AG062550.2
TdGRF4	2B	wewseq	mRNA	281223761	281226304	.	-	.	ID=transcript:TRIDC2BG034590.1;Parent=gene:TRIDC2BG034590;biotype=protein_coding;transcript_id=TRIDC2BG034590.1
TdGRF4	2B	wewseq	three_prime_UTR	281223761	281224189	.	-	.	Parent=transcript:TRIDC2BG034590.1
TdGRF4	2B	wewseq	exon	281223761	281224506	.	-	.	Parent=transcript:TRIDC2BG034590.1;Name=TRIDC2BG034590.1-E3;constitutive=0;ensembl_end_phase=-1;ensembl_phase=1;exon_id=TRIDC2BG034590.1-E3;rank=3
TdGRF4	2B	wewseq	CDS	281224190	281224506	.	-	2	ID=CDS:TRIDC2BG034590.1;Parent=transcript:TRIDC2BG034590.1;protein_id=TRIDC2BG034590.1
TdGRF4	2B	wewseq	exon	281224809	281225033	.	-	.	Parent=transcript:TRIDC2BG034590.1;Name=TRIDC2BG034590.4-E2;constitutive=0;ensembl_end_phase=1;ensembl_phase=1;exon_id=TRIDC2BG034590.4-E2;rank=2
TdGRF4	2B	wewseq	CDS	281224809	281225033	.	-	2	ID=CDS:TRIDC2BG034590.1;Parent=transcript:TRIDC2BG034590.1;protein_id=TRIDC2BG034590.1
TdGRF4	2B	wewseq	CDS	281225931	281226303	.	-	0	ID=CDS:TRIDC2BG034590.1;Parent=transcript:TRIDC2BG034590.1;protein_id=TRIDC2BG034590.1
TdGRF4	2B	wewseq	exon	281225931	281226304	.	-	.	Parent=transcript:TRIDC2BG034590.1;Name=TRIDC2BG034590.1-E1;constitutive=0;ensembl_end_phase=1;ensembl_phase=-1;exon_id=TRIDC2BG034590.1-E1;rank=1
TdGRF4	2B	wewseq	five_prime_UTR	281226304	281226304	.	-	.	Parent=transcript:TRIDC2BG034590.1
TdGRF5	2B	wewseq	mRNA	593021626	593022630	.	-	.	ID=transcript:TRIDC2BG060470.2;Parent=gene:TRIDC2BG060470;biotype=protein_coding;transcript_id=TRIDC2BG060470.2
TdGRF5	2B	wewseq	three_prime_UTR	593021626	593021626	.	-	.	Parent=transcript:TRIDC2BG060470.2
TdGRF5	2B	wewseq	exon	593021626	593021688	.	-	.	Parent=transcript:TRIDC2BG060470.2;Name=TRIDC2BG060470.2-E4;constitutive=0;ensembl_end_phase=-1;ensembl_phase=1;exon_id=TRIDC2BG060470.2-E4;rank=4
TdGRF5	2B	wewseq	CDS	593021627	593021688	.	-	2	ID=CDS:TRIDC2BG060470.2;Parent=transcript:TRIDC2BG060470.2;protein_id=TRIDC2BG060470.2
TdGRF5	2B	wewseq	exon	593021889	593022083	.	-	.	Parent=transcript:TRIDC2BG060470.2;Name=TRIDC2BG060470.2-E3;constitutive=0;ensembl_end_phase=1;ensembl_phase=1;exon_id=TRIDC2BG060470.2-E3;rank=3
TdGRF5	2B	wewseq	CDS	593021889	593022083	.	-	2	ID=CDS:TRIDC2BG060470.2;Parent=transcript:TRIDC2BG060470.2;protein_id=TRIDC2BG060470.2
TdGRF5	2B	wewseq	exon	593022196	593022465	.	-	.	Parent=transcript:TRIDC2BG060470.2;Name=TRIDC2BG060470.2-E2;constitutive=0;ensembl_end_phase=1;ensembl_phase=1;exon_id=TRIDC2BG060470.2-E2;rank=2
TdGRF5	2B	wewseq	CDS	593022196	593022465	.	-	2	ID=CDS:TRIDC2BG060470.2;Parent=transcript:TRIDC2BG060470.2;protein_id=TRIDC2BG060470.2
TdGRF5	2B	wewseq	exon	593022543	593022630	.	-	.	Parent=transcript:TRIDC2BG060470.2;Name=TRIDC2BG060470.2-E1;constitutive=0;ensembl_end_phase=1;ensembl_phase=0;exon_id=TRIDC2BG060470.2-E1;rank=1
TdGRF5	2B	wewseq	CDS	593022543	593022630	.	-	0	ID=CDS:TRIDC2BG060470.2;Parent=transcript:TRIDC2BG060470.2;protein_id=TRIDC2BG060470.2
TdGRF5	2B	wewseq	exon	593022196	593022465	.	-	.	Parent=transcript:TRIDC2BG060470.6;Name=TRIDC2BG060470.2-E2;constitutive=0;ensembl_end_phase=1;ensembl_phase=1;exon_id=TRIDC2BG060470.2-E2;rank=2
TdGRF6	2B	wewseq	mRNA	649416222	649419499	.	+	.	ID=transcript:TRIDC2BG066890.1;Parent=gene:TRIDC2BG066890;biotype=protein_coding;transcript_id=TRIDC2BG066890.1
TdGRF6	2B	wewseq	exon	649416222	649416330	.	+	.	Parent=transcript:TRIDC2BG066890.1;Name=TRIDC2BG066890.1-E1;constitutive=0;ensembl_end_phase=1;ensembl_phase=0;exon_id=TRIDC2BG066890.1-E1;rank=1
TdGRF6	2B	wewseq	CDS	649416222	649416330	.	+	0	ID=CDS:TRIDC2BG066890.1;Parent=transcript:TRIDC2BG066890.1;protein_id=TRIDC2BG066890.1
TdGRF6	2B	wewseq	exon	649416457	649416678	.	+	.	Parent=transcript:TRIDC2BG066890.1;Name=TRIDC2BG066890.1-E2;constitutive=0;ensembl_end_phase=1;ensembl_phase=1;exon_id=TRIDC2BG066890.1-E2;rank=2
TdGRF6	2B	wewseq	CDS	649416457	649416678	.	+	2	ID=CDS:TRIDC2BG066890.1;Parent=transcript:TRIDC2BG066890.1;protein_id=TRIDC2BG066890.1
TdGRF6	2B	wewseq	exon	649417545	649417923	.	+	.	Parent=transcript:TRIDC2BG066890.1;Name=TRIDC2BG066890.4-E3;constitutive=0;ensembl_end_phase=2;ensembl_phase=1;exon_id=TRIDC2BG066890.4-E3;rank=3
TdGRF6	2B	wewseq	CDS	649417545	649417923	.	+	2	ID=CDS:TRIDC2BG066890.1;Parent=transcript:TRIDC2BG066890.1;protein_id=TRIDC2BG066890.1
TdGRF6	2B	wewseq	CDS	649418840	649418888	.	+	1	ID=CDS:TRIDC2BG066890.1;Parent=transcript:TRIDC2BG066890.1;protein_id=TRIDC2BG066890.1
TdGRF6	2B	wewseq	exon	649418840	649418898	.	+	.	Parent=transcript:TRIDC2BG066890.1;Name=TRIDC2BG066890.1-E4;constitutive=0;ensembl_end_phase=-1;ensembl_phase=2;exon_id=TRIDC2BG066890.1-E4;rank=4
TdGRF6	2B	wewseq	three_prime_UTR	649418889	649418898	.	+	.	Parent=transcript:TRIDC2BG066890.1
TdGRF6	2B	wewseq	exon	649419027	649419499	.	+	.	Parent=transcript:TRIDC2BG066890.1;Name=TRIDC2BG066890.1-E5;constitutive=0;ensembl_end_phase=-1;ensembl_phase=-1;exon_id=TRIDC2BG066890.1-E5;rank=5
TdGRF6	2B	wewseq	three_prime_UTR	649419027	649419499	.	+	.	Parent=transcript:TRIDC2BG066890.1
TdGRF6	2B	wewseq	exon	649418840	649418898	.	+	.	Parent=transcript:TRIDC2BG066890.3;Name=TRIDC2BG066890.1-E4;constitutive=0;ensembl_end_phase=-1;ensembl_phase=2;exon_id=TRIDC2BG066890.1-E4;rank=4
TdGRF7	4A	wewseq	mRNA	560400026	560402795	.	-	.	ID=transcript:TRIDC4AG039920.3;Parent=gene:TRIDC4AG039920;biotype=protein_coding;transcript_id=TRIDC4AG039920.3
TdGRF7	4A	wewseq	three_prime_UTR	560400026	560400382	.	-	.	Parent=transcript:TRIDC4AG039920.3
TdGRF7	4A	wewseq	exon	560400026	560401259	.	-	.	Parent=transcript:TRIDC4AG039920.3;Name=TRIDC4AG039920.3-E3;constitutive=0;ensembl_end_phase=-1;ensembl_phase=2;exon_id=TRIDC4AG039920.3-E3;rank=3
TdGRF7	4A	wewseq	CDS	560400383	560401259	.	-	1	ID=CDS:TRIDC4AG039920.3;Parent=transcript:TRIDC4AG039920.3;protein_id=TRIDC4AG039920.3
TdGRF7	4A	wewseq	exon	560401851	560402208	.	-	.	Parent=transcript:TRIDC4AG039920.3;Name=TRIDC4AG039920.3-E2;constitutive=0;ensembl_end_phase=2;ensembl_phase=1;exon_id=TRIDC4AG039920.3-E2;rank=2
TdGRF7	4A	wewseq	CDS	560401851	560402208	.	-	2	ID=CDS:TRIDC4AG039920.3;Parent=transcript:TRIDC4AG039920.3;protein_id=TRIDC4AG039920.3
TdGRF7	4A	wewseq	CDS	560402352	560402523	.	-	0	ID=CDS:TRIDC4AG039920.3;Parent=transcript:TRIDC4AG039920.3;protein_id=TRIDC4AG039920.3
TdGRF7	4A	wewseq	exon	560402352	560402795	.	-	.	Parent=transcript:TRIDC4AG039920.3;Name=TRIDC4AG039920.3-E1;constitutive=0;ensembl_end_phase=1;ensembl_phase=-1;exon_id=TRIDC4AG039920.3-E1;rank=1
TdGRF7	4A	wewseq	five_prime_UTR	560402524	560402795	.	-	.	Parent=transcript:TRIDC4AG039920.3
TdGRF8	4A	wewseq	mRNA	587328018	587331174	.	-	.	ID=transcript:TRIDC4AG044870.4;Parent=gene:TRIDC4AG044870;biotype=protein_coding;transcript_id=TRIDC4AG044870.4
TdGRF8	4A	wewseq	three_prime_UTR	587328018	587329653	.	-	.	Parent=transcript:TRIDC4AG044870.4
TdGRF8	4A	wewseq	exon	587328018	587329994	.	-	.	Parent=transcript:TRIDC4AG044870.4;Name=TRIDC4AG044870.4-E2;constitutive=0;ensembl_end_phase=-1;ensembl_phase=1;exon_id=TRIDC4AG044870.4-E2;rank=2
TdGRF8	4A	wewseq	CDS	587329654	587329994	.	-	2	ID=CDS:TRIDC4AG044870.4;Parent=transcript:TRIDC4AG044870.4;protein_id=TRIDC4AG044870.4
TdGRF8	4A	wewseq	CDS	587330462	587330897	.	-	0	ID=CDS:TRIDC4AG044870.4;Parent=transcript:TRIDC4AG044870.4;protein_id=TRIDC4AG044870.4
TdGRF8	4A	wewseq	exon	587330462	587331174	.	-	.	Parent=transcript:TRIDC4AG044870.4;Name=TRIDC4AG044870.4-E1;constitutive=0;ensembl_end_phase=1;ensembl_phase=-1;exon_id=TRIDC4AG044870.4-E1;rank=1
TdGRF8	4A	wewseq	five_prime_UTR	587330898	587331174	.	-	.	Parent=transcript:TRIDC4AG044870.4
TdGRF9	4A	wewseq	mRNA	693885434	693888421	.	+	.	ID=transcript:TRIDC4AG065110.1;Parent=gene:TRIDC4AG065110;biotype=protein_coding;transcript_id=TRIDC4AG065110.1
TdGRF9	4A	wewseq	five_prime_UTR	693885434	693885686	.	+	.	Parent=transcript:TRIDC4AG065110.1
TdGRF9	4A	wewseq	exon	693885434	693885981	.	+	.	Parent=transcript:TRIDC4AG065110.1;Name=TRIDC4AG065110.1-E1;constitutive=0;ensembl_end_phase=1;ensembl_phase=-1;exon_id=TRIDC4AG065110.1-E1;rank=1
TdGRF9	4A	wewseq	CDS	693885687	693885981	.	+	0	ID=CDS:TRIDC4AG065110.1;Parent=transcript:TRIDC4AG065110.1;protein_id=TRIDC4AG065110.1
TdGRF9	4A	wewseq	exon	693886425	693886767	.	+	.	Parent=transcript:TRIDC4AG065110.1;Name=TRIDC4AG065110.1-E2;constitutive=0;ensembl_end_phase=2;ensembl_phase=1;exon_id=TRIDC4AG065110.1-E2;rank=2
TdGRF9	4A	wewseq	CDS	693886425	693886767	.	+	2	ID=CDS:TRIDC4AG065110.1;Parent=transcript:TRIDC4AG065110.1;protein_id=TRIDC4AG065110.1
TdGRF9	4A	wewseq	exon	693887845	693888314	.	+	.	Parent=transcript:TRIDC4AG065110.1;Name=TRIDC4AG065110.2-E4;constitutive=0;ensembl_end_phase=1;ensembl_phase=2;exon_id=TRIDC4AG065110.2-E4;rank=3
TdGRF9	4A	wewseq	CDS	693887845	693888314	.	+	1	ID=CDS:TRIDC4AG065110.1;Parent=transcript:TRIDC4AG065110.1;protein_id=TRIDC4AG065110.1
TdGRF9	4A	wewseq	exon	693888414	693888421	.	+	.	Parent=transcript:TRIDC4AG065110.1;Name=TRIDC4AG065110.2-E5;constitutive=0;ensembl_end_phase=0;ensembl_phase=1;exon_id=TRIDC4AG065110.2-E5;rank=4
TdGRF9	4A	wewseq	CDS	693888414	693888421	.	+	2	ID=CDS:TRIDC4AG065110.1;Parent=transcript:TRIDC4AG065110.1;protein_id=TRIDC4AG065110.1
TdGRF9	4A	wewseq	exon	693886425	693886767	.	+	.	Parent=transcript:TRIDC4AG065110.3;Name=TRIDC4AG065110.1-E2;constitutive=0;ensembl_end_phase=2;ensembl_phase=1;exon_id=TRIDC4AG065110.1-E2;rank=2
TdGRF10	4B	wewseq	mRNA	14917660	14921313	.	+	.	ID=transcript:TRIDC4BG003830.1;Parent=gene:TRIDC4BG003830;biotype=protein_coding;transcript_id=TRIDC4BG003830.1
TdGRF10	4B	wewseq	exon	14917660	14917729	.	+	.	Parent=transcript:TRIDC4BG003830.1;Name=TRIDC4BG003830.1-E1;constitutive=0;ensembl_end_phase=1;ensembl_phase=0;exon_id=TRIDC4BG003830.1-E1;rank=1
TdGRF10	4B	wewseq	CDS	14917660	14917729	.	+	0	ID=CDS:TRIDC4BG003830.1;Parent=transcript:TRIDC4BG003830.1;protein_id=TRIDC4BG003830.1
TdGRF10	4B	wewseq	exon	14918168	14918356	.	+	.	Parent=transcript:TRIDC4BG003830.1;Name=TRIDC4BG003830.1-E2;constitutive=0;ensembl_end_phase=1;ensembl_phase=1;exon_id=TRIDC4BG003830.1-E2;rank=2
TdGRF10	4B	wewseq	CDS	14918168	14918356	.	+	2	ID=CDS:TRIDC4BG003830.1;Parent=transcript:TRIDC4BG003830.1;protein_id=TRIDC4BG003830.1
TdGRF10	4B	wewseq	exon	14918798	14919119	.	+	.	Parent=transcript:TRIDC4BG003830.1;Name=TRIDC4BG003830.1-E3;constitutive=0;ensembl_end_phase=2;ensembl_phase=1;exon_id=TRIDC4BG003830.1-E3;rank=3
TdGRF10	4B	wewseq	CDS	14918798	14919119	.	+	2	ID=CDS:TRIDC4BG003830.1;Parent=transcript:TRIDC4BG003830.1;protein_id=TRIDC4BG003830.1
TdGRF10	4B	wewseq	CDS	14919290	14919827	.	+	1	ID=CDS:TRIDC4BG003830.1;Parent=transcript:TRIDC4BG003830.1;protein_id=TRIDC4BG003830.1
TdGRF10	4B	wewseq	exon	14919290	14921313	.	+	.	Parent=transcript:TRIDC4BG003830.1;Name=TRIDC4BG003830.1-E4;constitutive=0;ensembl_end_phase=-1;ensembl_phase=2;exon_id=TRIDC4BG003830.1-E4;rank=4
TdGRF10	4B	wewseq	three_prime_UTR	14919828	14921313	.	+	.	Parent=transcript:TRIDC4BG003830.1
TdGRF10	4B	wewseq	exon	14918168	14918356	.	+	.	Parent=transcript:TRIDC4BG003830.6;Name=TRIDC4BG003830.1-E2;constitutive=0;ensembl_end_phase=1;ensembl_phase=1;exon_id=TRIDC4BG003830.1-E2;rank=2
TdGRF10	4B	wewseq	exon	14918798	14919119	.	+	.	Parent=transcript:TRIDC4BG003830.9;Name=TRIDC4BG003830.1-E3;constitutive=0;ensembl_end_phase=2;ensembl_phase=1;exon_id=TRIDC4BG003830.1-E3;rank=3
TdGRF11	4B	wewseq	mRNA	49483215	49485858	.	+	.	ID=transcript:TRIDC4BG009270.1;Parent=gene:TRIDC4BG009270;biotype=protein_coding;transcript_id=TRIDC4BG009270.1
TdGRF11	4B	wewseq	five_prime_UTR	49483215	49483215	.	+	.	Parent=transcript:TRIDC4BG009270.1
TdGRF11	4B	wewseq	exon	49483215	49483567	.	+	.	Parent=transcript:TRIDC4BG009270.1;Name=TRIDC4BG009270.1-E1;constitutive=0;ensembl_end_phase=1;ensembl_phase=-1;exon_id=TRIDC4BG009270.1-E1;rank=1
TdGRF11	4B	wewseq	CDS	49483216	49483567	.	+	0	ID=CDS:TRIDC4BG009270.1;Parent=transcript:TRIDC4BG009270.1;protein_id=TRIDC4BG009270.1
TdGRF11	4B	wewseq	exon	49483720	49484080	.	+	.	Parent=transcript:TRIDC4BG009270.1;Name=TRIDC4BG009270.1-E2;constitutive=0;ensembl_end_phase=2;ensembl_phase=1;exon_id=TRIDC4BG009270.1-E2;rank=2
TdGRF11	4B	wewseq	CDS	49483720	49484080	.	+	2	ID=CDS:TRIDC4BG009270.1;Parent=transcript:TRIDC4BG009270.1;protein_id=TRIDC4BG009270.1
TdGRF11	4B	wewseq	CDS	49484683	49485559	.	+	1	ID=CDS:TRIDC4BG009270.1;Parent=transcript:TRIDC4BG009270.1;protein_id=TRIDC4BG009270.1
TdGRF11	4B	wewseq	exon	49484683	49485858	.	+	.	Parent=transcript:TRIDC4BG009270.1;Name=TRIDC4BG009270.1-E3;constitutive=0;ensembl_end_phase=-1;ensembl_phase=2;exon_id=TRIDC4BG009270.1-E3;rank=3
TdGRF11	4B	wewseq	three_prime_UTR	49485560	49485858	.	+	.	Parent=transcript:TRIDC4BG009270.1
TdGRF12	6A	wewseq	mRNA	481434869	481435684	.	+	.	ID=transcript:TRIDC6AG039700.1;Parent=gene:TRIDC6AG039700;biotype=protein_coding;transcript_id=TRIDC6AG039700.1
TdGRF12	6A	wewseq	exon	481434869	481434947	.	+	.	Parent=transcript:TRIDC6AG039700.1;Name=TRIDC6AG039700.1-E1;constitutive=0;ensembl_end_phase=1;ensembl_phase=0;exon_id=TRIDC6AG039700.1-E1;rank=1
TdGRF12	6A	wewseq	CDS	481434869	481434947	.	+	0	ID=CDS:TRIDC6AG039700.1;Parent=transcript:TRIDC6AG039700.1;protein_id=TRIDC6AG039700.1
TdGRF12	6A	wewseq	exon	481435045	481435308	.	+	.	Parent=transcript:TRIDC6AG039700.1;Name=TRIDC6AG039700.1-E2;constitutive=0;ensembl_end_phase=1;ensembl_phase=1;exon_id=TRIDC6AG039700.1-E2;rank=2
TdGRF12	6A	wewseq	CDS	481435045	481435308	.	+	2	ID=CDS:TRIDC6AG039700.1;Parent=transcript:TRIDC6AG039700.1;protein_id=TRIDC6AG039700.1
TdGRF12	6A	wewseq	exon	481435389	481435684	.	+	.	Parent=transcript:TRIDC6AG039700.1;Name=TRIDC6AG039700.1-E3;constitutive=0;ensembl_end_phase=0;ensembl_phase=1;exon_id=TRIDC6AG039700.1-E3;rank=3
TdGRF12	6A	wewseq	CDS	481435389	481435684	.	+	2	ID=CDS:TRIDC6AG039700.1;Parent=transcript:TRIDC6AG039700.1;protein_id=TRIDC6AG039700.1
TdGRF12	6A	wewseq	exon	481435045	481435308	.	+	.	Parent=transcript:TRIDC6AG039700.2;Name=TRIDC6AG039700.1-E2;constitutive=0;ensembl_end_phase=1;ensembl_phase=1;exon_id=TRIDC6AG039700.1-E2;rank=2
TdGRF12	6A	wewseq	exon	481435045	481435308	.	+	.	Parent=transcript:TRIDC6AG039700.3;Name=TRIDC6AG039700.1-E2;constitutive=0;ensembl_end_phase=1;ensembl_phase=1;exon_id=TRIDC6AG039700.1-E2;rank=2
TdGRF12	6A	wewseq	exon	481435045	481435308	.	+	.	Parent=transcript:TRIDC6AG039700.4;Name=TRIDC6AG039700.1-E2;constitutive=0;ensembl_end_phase=1;ensembl_phase=1;exon_id=TRIDC6AG039700.1-E2;rank=2
TdGRF13	6A	wewseq	mRNA	497980232	497986204	.	-	.	ID=transcript:TRIDC6AG041360.3;Parent=gene:TRIDC6AG041360;biotype=protein_coding;transcript_id=TRIDC6AG041360.3
TdGRF13	6A	wewseq	exon	497980232	497980235	.	-	.	Parent=transcript:TRIDC6AG041360.3;Name=TRIDC6AG041360.3-E4;constitutive=0;ensembl_end_phase=0;ensembl_phase=2;exon_id=TRIDC6AG041360.3-E4;rank=4
TdGRF13	6A	wewseq	CDS	497980232	497980235	.	-	1	ID=CDS:TRIDC6AG041360.3;Parent=transcript:TRIDC6AG041360.3;protein_id=TRIDC6AG041360.3
TdGRF13	6A	wewseq	exon	497980362	497980820	.	-	.	Parent=transcript:TRIDC6AG041360.3;Name=TRIDC6AG041360.3-E3;constitutive=0;ensembl_end_phase=2;ensembl_phase=2;exon_id=TRIDC6AG041360.3-E3;rank=3
TdGRF13	6A	wewseq	CDS	497980362	497980820	.	-	1	ID=CDS:TRIDC6AG041360.3;Parent=transcript:TRIDC6AG041360.3;protein_id=TRIDC6AG041360.3
TdGRF13	6A	wewseq	exon	497984841	497985255	.	-	.	Parent=transcript:TRIDC6AG041360.3;Name=TRIDC6AG041360.3-E2;constitutive=0;ensembl_end_phase=2;ensembl_phase=1;exon_id=TRIDC6AG041360.3-E2;rank=2
TdGRF13	6A	wewseq	CDS	497984841	497985255	.	-	2	ID=CDS:TRIDC6AG041360.3;Parent=transcript:TRIDC6AG041360.3;protein_id=TRIDC6AG041360.3
TdGRF13	6A	wewseq	CDS	497985792	497985993	.	-	0	ID=CDS:TRIDC6AG041360.3;Parent=transcript:TRIDC6AG041360.3;protein_id=TRIDC6AG041360.3
TdGRF13	6A	wewseq	exon	497985792	497986204	.	-	.	Parent=transcript:TRIDC6AG041360.3;Name=TRIDC6AG041360.3-E1;constitutive=0;ensembl_end_phase=1;ensembl_phase=-1;exon_id=TRIDC6AG041360.3-E1;rank=1
TdGRF13	6A	wewseq	five_prime_UTR	497985994	497986204	.	-	.	Parent=transcript:TRIDC6AG041360.3
TdGRF13	6A	wewseq	exon	497984841	497985255	.	-	.	Parent=transcript:TRIDC6AG041360.4;Name=TRIDC6AG041360.3-E2;constitutive=0;ensembl_end_phase=2;ensembl_phase=1;exon_id=TRIDC6AG041360.3-E2;rank=3
TdGRF13	6A	wewseq	exon	497984841	497985255	.	-	.	Parent=transcript:TRIDC6AG041360.5;Name=TRIDC6AG041360.3-E2;constitutive=0;ensembl_end_phase=2;ensembl_phase=1;exon_id=TRIDC6AG041360.3-E2;rank=4
TdGRF14	6B	wewseq	mRNA	498497904	498498787	.	+	.	ID=transcript:TRIDC6BG046580.1;Parent=gene:TRIDC6BG046580;biotype=protein_coding;transcript_id=TRIDC6BG046580.1
TdGRF14	6B	wewseq	exon	498497904	498497982	.	+	.	Parent=transcript:TRIDC6BG046580.1;Name=TRIDC6BG046580.1-E1;constitutive=0;ensembl_end_phase=1;ensembl_phase=0;exon_id=TRIDC6BG046580.1-E1;rank=1
TdGRF14	6B	wewseq	CDS	498497904	498497982	.	+	0	ID=CDS:TRIDC6BG046580.1;Parent=transcript:TRIDC6BG046580.1;protein_id=TRIDC6BG046580.1
TdGRF14	6B	wewseq	exon	498498077	498498349	.	+	.	Parent=transcript:TRIDC6BG046580.1;Name=TRIDC6BG046580.1-E2;constitutive=0;ensembl_end_phase=1;ensembl_phase=1;exon_id=TRIDC6BG046580.1-E2;rank=2
TdGRF14	6B	wewseq	CDS	498498077	498498349	.	+	2	ID=CDS:TRIDC6BG046580.1;Parent=transcript:TRIDC6BG046580.1;protein_id=TRIDC6BG046580.1
TdGRF14	6B	wewseq	CDS	498498429	498498712	.	+	2	ID=CDS:TRIDC6BG046580.1;Parent=transcript:TRIDC6BG046580.1;protein_id=TRIDC6BG046580.1
TdGRF14	6B	wewseq	exon	498498429	498498787	.	+	.	Parent=transcript:TRIDC6BG046580.1;Name=TRIDC6BG046580.1-E3;constitutive=0;ensembl_end_phase=-1;ensembl_phase=1;exon_id=TRIDC6BG046580.1-E3;rank=3
TdGRF14	6B	wewseq	three_prime_UTR	498498713	498498787	.	+	.	Parent=transcript:TRIDC6BG046580.1
TdGRF14	6B	wewseq	exon	498498077	498498349	.	+	.	Parent=transcript:TRIDC6BG046580.2;Name=TRIDC6BG046580.1-E2;constitutive=0;ensembl_end_phase=1;ensembl_phase=1;exon_id=TRIDC6BG046580.1-E2;rank=2
TdGRF14	6B	wewseq	exon	498498077	498498349	.	+	.	Parent=transcript:TRIDC6BG046580.3;Name=TRIDC6BG046580.1-E2;constitutive=0;ensembl_end_phase=1;ensembl_phase=1;exon_id=TRIDC6BG046580.1-E2;rank=2
TdGRF15	6B	wewseq	mRNA	517412680	517416237	.	-	.	ID=transcript:TRIDC6BG048340.2;Parent=gene:TRIDC6BG048340;biotype=protein_coding;transcript_id=TRIDC6BG048340.2
TdGRF15	6B	wewseq	exon	517412680	517412708	.	-	.	Parent=transcript:TRIDC6BG048340.2;Name=TRIDC6BG048340.2-E5;constitutive=0;ensembl_end_phase=0;ensembl_phase=1;exon_id=TRIDC6BG048340.2-E5;rank=5
TdGRF15	6B	wewseq	CDS	517412680	517412708	.	-	2	ID=CDS:TRIDC6BG048340.2;Parent=transcript:TRIDC6BG048340.2;protein_id=TRIDC6BG048340.2
TdGRF15	6B	wewseq	exon	517412979	517413445	.	-	.	Parent=transcript:TRIDC6BG048340.2;Name=TRIDC6BG048340.2-E4;constitutive=0;ensembl_end_phase=1;ensembl_phase=2;exon_id=TRIDC6BG048340.2-E4;rank=4
TdGRF15	6B	wewseq	CDS	517412979	517413445	.	-	1	ID=CDS:TRIDC6BG048340.2;Parent=transcript:TRIDC6BG048340.2;protein_id=TRIDC6BG048340.2
TdGRF15	6B	wewseq	exon	517414909	517415314	.	-	.	Parent=transcript:TRIDC6BG048340.2;Name=TRIDC6BG048340.7-E3;constitutive=0;ensembl_end_phase=2;ensembl_phase=1;exon_id=TRIDC6BG048340.7-E3;rank=3
TdGRF15	6B	wewseq	CDS	517414909	517415314	.	-	2	ID=CDS:TRIDC6BG048340.2;Parent=transcript:TRIDC6BG048340.2;protein_id=TRIDC6BG048340.2
TdGRF15	6B	wewseq	exon	517415804	517416021	.	-	.	Parent=transcript:TRIDC6BG048340.2;Name=TRIDC6BG048340.2-E2;constitutive=0;ensembl_end_phase=1;ensembl_phase=2;exon_id=TRIDC6BG048340.2-E2;rank=2
TdGRF15	6B	wewseq	CDS	517415804	517416021	.	-	1	ID=CDS:TRIDC6BG048340.2;Parent=transcript:TRIDC6BG048340.2;protein_id=TRIDC6BG048340.2
TdGRF15	6B	wewseq	CDS	517416112	517416236	.	-	0	ID=CDS:TRIDC6BG048340.2;Parent=transcript:TRIDC6BG048340.2;protein_id=TRIDC6BG048340.2
TdGRF15	6B	wewseq	exon	517416112	517416237	.	-	.	Parent=transcript:TRIDC6BG048340.2;Name=TRIDC6BG048340.2-E1;constitutive=0;ensembl_end_phase=2;ensembl_phase=-1;exon_id=TRIDC6BG048340.2-E1;rank=1
TdGRF15	6B	wewseq	five_prime_UTR	517416237	517416237	.	-	.	Parent=transcript:TRIDC6BG048340.2
TdGRF15	6B	wewseq	exon	517415804	517416021	.	-	.	Parent=transcript:TRIDC6BG048340.4;Name=TRIDC6BG048340.2-E2;constitutive=0;ensembl_end_phase=1;ensembl_phase=2;exon_id=TRIDC6BG048340.2-E2;rank=2
TdGRF16	7A	wewseq	mRNA	18153215	18156420	.	-	.	ID=transcript:TRIDC7AG005090.2;Parent=gene:TRIDC7AG005090;biotype=protein_coding;transcript_id=TRIDC7AG005090.2
TdGRF16	7A	wewseq	three_prime_UTR	18153215	18153522	.	-	.	Parent=transcript:TRIDC7AG005090.2
TdGRF16	7A	wewseq	exon	18153215	18153530	.	-	.	Parent=transcript:TRIDC7AG005090.2;Name=TRIDC7AG005090.3-E4;constitutive=0;ensembl_end_phase=-1;ensembl_phase=1;exon_id=TRIDC7AG005090.3-E4;rank=5
TdGRF16	7A	wewseq	CDS	18153523	18153530	.	-	2	ID=CDS:TRIDC7AG005090.2;Parent=transcript:TRIDC7AG005090.2;protein_id=TRIDC7AG005090.2
TdGRF16	7A	wewseq	exon	18153634	18153769	.	-	.	Parent=transcript:TRIDC7AG005090.2;Name=TRIDC7AG005090.2-E4;constitutive=0;ensembl_end_phase=1;ensembl_phase=0;exon_id=TRIDC7AG005090.2-E4;rank=4
TdGRF16	7A	wewseq	CDS	18153634	18153769	.	-	0	ID=CDS:TRIDC7AG005090.2;Parent=transcript:TRIDC7AG005090.2;protein_id=TRIDC7AG005090.2
TdGRF16	7A	wewseq	exon	18153878	18154100	.	-	.	Parent=transcript:TRIDC7AG005090.2;Name=TRIDC7AG005090.2-E3;constitutive=0;ensembl_end_phase=0;ensembl_phase=2;exon_id=TRIDC7AG005090.2-E3;rank=3
TdGRF16	7A	wewseq	CDS	18153878	18154100	.	-	1	ID=CDS:TRIDC7AG005090.2;Parent=transcript:TRIDC7AG005090.2;protein_id=TRIDC7AG005090.2
TdGRF16	7A	wewseq	exon	18155171	18155513	.	-	.	Parent=transcript:TRIDC7AG005090.2;Name=TRIDC7AG005090.3-E2;constitutive=0;ensembl_end_phase=2;ensembl_phase=1;exon_id=TRIDC7AG005090.3-E2;rank=2
TdGRF16	7A	wewseq	CDS	18155171	18155513	.	-	2	ID=CDS:TRIDC7AG005090.2;Parent=transcript:TRIDC7AG005090.2;protein_id=TRIDC7AG005090.2
TdGRF16	7A	wewseq	CDS	18155998	18156286	.	-	0	ID=CDS:TRIDC7AG005090.2;Parent=transcript:TRIDC7AG005090.2;protein_id=TRIDC7AG005090.2
TdGRF16	7A	wewseq	exon	18155998	18156420	.	-	.	Parent=transcript:TRIDC7AG005090.2;Name=TRIDC7AG005090.3-E1;constitutive=0;ensembl_end_phase=1;ensembl_phase=-1;exon_id=TRIDC7AG005090.3-E1;rank=1
TdGRF16	7A	wewseq	five_prime_UTR	18156287	18156420	.	-	.	Parent=transcript:TRIDC7AG005090.2
TdGRF17	7A	wewseq	mRNA	118598652	118599786	.	+	.	ID=transcript:TRIDC7AG020510.2;Parent=gene:TRIDC7AG020510;biotype=protein_coding;transcript_id=TRIDC7AG020510.2
TdGRF17	7A	wewseq	exon	118598652	118598871	.	+	.	Parent=transcript:TRIDC7AG020510.2;Name=TRIDC7AG020510.2-E1;constitutive=0;ensembl_end_phase=1;ensembl_phase=0;exon_id=TRIDC7AG020510.2-E1;rank=1
TdGRF17	7A	wewseq	CDS	118598652	118598871	.	+	0	ID=CDS:TRIDC7AG020510.2;Parent=transcript:TRIDC7AG020510.2;protein_id=TRIDC7AG020510.2
TdGRF17	7A	wewseq	exon	118599003	118599704	.	+	.	Parent=transcript:TRIDC7AG020510.2;Name=TRIDC7AG020510.2-E2;constitutive=0;ensembl_end_phase=1;ensembl_phase=1;exon_id=TRIDC7AG020510.2-E2;rank=2
TdGRF17	7A	wewseq	CDS	118599003	118599704	.	+	2	ID=CDS:TRIDC7AG020510.2;Parent=transcript:TRIDC7AG020510.2;protein_id=TRIDC7AG020510.2
TdGRF17	7A	wewseq	exon	118599773	118599786	.	+	.	Parent=transcript:TRIDC7AG020510.2;Name=TRIDC7AG020510.2-E3;constitutive=0;ensembl_end_phase=0;ensembl_phase=1;exon_id=TRIDC7AG020510.2-E3;rank=3
TdGRF17	7A	wewseq	CDS	118599773	118599786	.	+	2	ID=CDS:TRIDC7AG020510.2;Parent=transcript:TRIDC7AG020510.2;protein_id=TRIDC7AG020510.2
TdGRF18	7B	wewseq	mRNA	80766940	80768111	.	+	.	ID=transcript:TRIDC7BG010470.1;Parent=gene:TRIDC7BG010470;biotype=protein_coding;transcript_id=TRIDC7BG010470.1
TdGRF18	7B	wewseq	exon	80766940	80767162	.	+	.	Parent=transcript:TRIDC7BG010470.1;Name=TRIDC7BG010470.1-E1;constitutive=1;ensembl_end_phase=1;ensembl_phase=0;exon_id=TRIDC7BG010470.1-E1;rank=1
TdGRF18	7B	wewseq	CDS	80766940	80767162	.	+	0	ID=CDS:TRIDC7BG010470.1;Parent=transcript:TRIDC7BG010470.1;protein_id=TRIDC7BG010470.1
TdGRF18	7B	wewseq	exon	80767299	80768018	.	+	.	Parent=transcript:TRIDC7BG010470.1;Name=TRIDC7BG010470.1-E2;constitutive=1;ensembl_end_phase=1;ensembl_phase=1;exon_id=TRIDC7BG010470.1-E2;rank=2
TdGRF18	7B	wewseq	CDS	80767299	80768018	.	+	2	ID=CDS:TRIDC7BG010470.1;Parent=transcript:TRIDC7BG010470.1;protein_id=TRIDC7BG010470.1
TdGRF18	7B	wewseq	exon	80768104	80768111	.	+	.	Parent=transcript:TRIDC7BG010470.1;Name=TRIDC7BG010470.1-E3;constitutive=1;ensembl_end_phase=0;ensembl_phase=1;exon_id=TRIDC7BG010470.1-E3;rank=3
TdGRF18	7B	wewseq	CDS	80768104	80768111	.	+	2	ID=CDS:TRIDC7BG010470.1;Parent=transcript:TRIDC7BG010470.1;protein_id=TRIDC7BG010470.1
AeGRF1	2D	PGSB	mRNA	277213443	277215858	.	+	.	ID=transcript:AET2Gv20538200.2;Parent=gene:AET2Gv20538200;biotype=protein_coding;transcript_id=AET2Gv20538200.2
AeGRF1	2D	PGSB	exon	277213443	277213791	.	+	.	Parent=transcript:AET2Gv20538200.2;Name=AET2Gv20538200.2-E1;constitutive=0;ensembl_end_phase=1;ensembl_phase=0;exon_id=AET2Gv20538200.2-E1;rank=1
AeGRF1	2D	PGSB	CDS	277213443	277213791	.	+	0	ID=CDS:AET2Gv20538200.2;Parent=transcript:AET2Gv20538200.2;protein_id=AET2Gv20538200.2
AeGRF1	2D	PGSB	exon	277214618	277214836	.	+	.	Parent=transcript:AET2Gv20538200.2;Name=AET2Gv20538200.2-E2;constitutive=0;ensembl_end_phase=1;ensembl_phase=1;exon_id=AET2Gv20538200.2-E2;rank=2
AeGRF1	2D	PGSB	CDS	277214618	277214836	.	+	2	ID=CDS:AET2Gv20538200.2;Parent=transcript:AET2Gv20538200.2;protein_id=AET2Gv20538200.2
AeGRF1	2D	PGSB	CDS	277215139	277215455	.	+	2	ID=CDS:AET2Gv20538200.2;Parent=transcript:AET2Gv20538200.2;protein_id=AET2Gv20538200.2
AeGRF1	2D	PGSB	exon	277215139	277215858	.	+	.	Parent=transcript:AET2Gv20538200.2;Name=AET2Gv20538200.2-E3;constitutive=0;ensembl_end_phase=-1;ensembl_phase=1;exon_id=AET2Gv20538200.2-E3;rank=3
AeGRF1	2D	PGSB	three_prime_UTR	277215456	277215858	.	+	.	Parent=transcript:AET2Gv20538200.2
AeGRF2	2D	PGSB	mRNA	505565012	505566266	.	-	.	ID=transcript:AET2Gv20886700.2;Parent=gene:AET2Gv20886700;biotype=protein_coding;transcript_id=AET2Gv20886700.2
AeGRF2	2D	PGSB	three_prime_UTR	505565012	505565240	.	-	.	Parent=transcript:AET2Gv20886700.2
AeGRF2	2D	PGSB	exon	505565012	505565569	.	-	.	Parent=transcript:AET2Gv20886700.2;Name=AET2Gv20886700.2-E3;constitutive=0;ensembl_end_phase=-1;ensembl_phase=1;exon_id=AET2Gv20886700.2-E3;rank=3
AeGRF2	2D	PGSB	CDS	505565241	505565569	.	-	2	ID=CDS:AET2Gv20886700.2;Parent=transcript:AET2Gv20886700.2;protein_id=AET2Gv20886700.2
AeGRF2	2D	PGSB	CDS	505565681	505565939	.	-	0	ID=CDS:AET2Gv20886700.2;Parent=transcript:AET2Gv20886700.2;protein_id=AET2Gv20886700.2
AeGRF2	2D	PGSB	exon	505565681	505565956	.	-	.	Parent=transcript:AET2Gv20886700.2;Name=AET2Gv20886700.2-E2;constitutive=0;ensembl_end_phase=1;ensembl_phase=-1;exon_id=AET2Gv20886700.2-E2;rank=2
AeGRF2	2D	PGSB	five_prime_UTR	505565940	505565956	.	-	.	Parent=transcript:AET2Gv20886700.2
AeGRF2	2D	PGSB	exon	505566045	505566266	.	-	.	Parent=transcript:AET2Gv20886700.2;Name=AET2Gv20886700.2-E1;constitutive=0;ensembl_end_phase=-1;ensembl_phase=-1;exon_id=AET2Gv20886700.2-E1;rank=1
AeGRF2	2D	PGSB	five_prime_UTR	505566045	505566266	.	-	.	Parent=transcript:AET2Gv20886700.2
AeGRF3	2D	PGSB	mRNA	544931065	544935034	.	+	.	ID=transcript:AET2Gv20964200.2;Parent=gene:AET2Gv20964200;biotype=protein_coding;transcript_id=AET2Gv20964200.2
AeGRF3	2D	PGSB	five_prime_UTR	544931065	544931593	.	+	.	Parent=transcript:AET2Gv20964200.2
AeGRF3	2D	PGSB	exon	544931065	544931780	.	+	.	Parent=transcript:AET2Gv20964200.2;Name=AET2Gv20964200.2-E1;constitutive=0;ensembl_end_phase=1;ensembl_phase=-1;exon_id=AET2Gv20964200.2-E1;rank=1
AeGRF3	2D	PGSB	CDS	544931594	544931780	.	+	0	ID=CDS:AET2Gv20964200.2;Parent=transcript:AET2Gv20964200.2;protein_id=AET2Gv20964200.2
AeGRF3	2D	PGSB	exon	544932610	544933003	.	+	.	Parent=transcript:AET2Gv20964200.2;Name=AET2Gv20964200.7-E3;constitutive=0;ensembl_end_phase=2;ensembl_phase=1;exon_id=AET2Gv20964200.7-E3;rank=2
AeGRF3	2D	PGSB	CDS	544932610	544933003	.	+	2	ID=CDS:AET2Gv20964200.2;Parent=transcript:AET2Gv20964200.2;protein_id=AET2Gv20964200.2
AeGRF3	2D	PGSB	CDS	544934230	544934692	.	+	1	ID=CDS:AET2Gv20964200.2;Parent=transcript:AET2Gv20964200.2;protein_id=AET2Gv20964200.2
AeGRF3	2D	PGSB	exon	544934230	544935034	.	+	.	Parent=transcript:AET2Gv20964200.2;Name=AET2Gv20964200.2-E3;constitutive=0;ensembl_end_phase=-1;ensembl_phase=2;exon_id=AET2Gv20964200.2-E3;rank=3
AeGRF3	2D	PGSB	three_prime_UTR	544934693	544935034	.	+	.	Parent=transcript:AET2Gv20964200.2
AeGRF4	4D	PGSB	mRNA	7856680	7864074	.	+	.	ID=transcript:AET4Gv20034000.11;Parent=gene:AET4Gv20034000;biotype=protein_coding;transcript_id=AET4Gv20034000.11
AeGRF4	4D	PGSB	five_prime_UTR	7856680	7856759	.	+	.	Parent=transcript:AET4Gv20034000.11
AeGRF4	4D	PGSB	exon	7856680	7856925	.	+	.	Parent=transcript:AET4Gv20034000.11;Name=AET4Gv20034000.11-E1;constitutive=0;ensembl_end_phase=1;ensembl_phase=-1;exon_id=AET4Gv20034000.11-E1;rank=1
AeGRF4	4D	PGSB	CDS	7856760	7856925	.	+	0	ID=CDS:AET4Gv20034000.11;Parent=transcript:AET4Gv20034000.11;protein_id=AET4Gv20034000.11
AeGRF4	4D	PGSB	exon	7857379	7857567	.	+	.	Parent=transcript:AET4Gv20034000.11;Name=AET4Gv20034000.20-E2;constitutive=0;ensembl_end_phase=1;ensembl_phase=1;exon_id=AET4Gv20034000.20-E2;rank=2
AeGRF4	4D	PGSB	CDS	7857379	7857567	.	+	2	ID=CDS:AET4Gv20034000.11;Parent=transcript:AET4Gv20034000.11;protein_id=AET4Gv20034000.11
AeGRF4	4D	PGSB	exon	7857920	7858238	.	+	.	Parent=transcript:AET4Gv20034000.11;Name=AET4Gv20034000.11-E3;constitutive=0;ensembl_end_phase=2;ensembl_phase=1;exon_id=AET4Gv20034000.11-E3;rank=3
AeGRF4	4D	PGSB	CDS	7857920	7858238	.	+	2	ID=CDS:AET4Gv20034000.11;Parent=transcript:AET4Gv20034000.11;protein_id=AET4Gv20034000.11
AeGRF4	4D	PGSB	CDS	7858409	7858955	.	+	1	ID=CDS:AET4Gv20034000.11;Parent=transcript:AET4Gv20034000.11;protein_id=AET4Gv20034000.11
AeGRF4	4D	PGSB	exon	7858409	7864074	.	+	.	Parent=transcript:AET4Gv20034000.11;Name=AET4Gv20034000.11-E4;constitutive=0;ensembl_end_phase=-1;ensembl_phase=2;exon_id=AET4Gv20034000.11-E4;rank=4
AeGRF4	4D	PGSB	three_prime_UTR	7858956	7864074	.	+	.	Parent=transcript:AET4Gv20034000.11
AeGRF4	4D	PGSB	exon	7857920	7858238	.	+	.	Parent=transcript:AET4Gv20034000.18;Name=AET4Gv20034000.11-E3;constitutive=0;ensembl_end_phase=2;ensembl_phase=1;exon_id=AET4Gv20034000.11-E3;rank=2
AeGRF4	4D	PGSB	exon	7857920	7858238	.	+	.	Parent=transcript:AET4Gv20034000.21;Name=AET4Gv20034000.11-E3;constitutive=0;ensembl_end_phase=2;ensembl_phase=1;exon_id=AET4Gv20034000.11-E3;rank=3
AeGRF5	4D	PGSB	mRNA	37815927	37820070	.	+	.	ID=transcript:AET4Gv20124900.1;Parent=gene:AET4Gv20124900;biotype=protein_coding;transcript_id=AET4Gv20124900.1
AeGRF5	4D	PGSB	five_prime_UTR	37815927	37816209	.	+	.	Parent=transcript:AET4Gv20124900.1
AeGRF5	4D	PGSB	exon	37815927	37816552	.	+	.	Parent=transcript:AET4Gv20124900.1;Name=AET4Gv20124900.1-E1;constitutive=0;ensembl_end_phase=1;ensembl_phase=-1;exon_id=AET4Gv20124900.1-E1;rank=1
AeGRF5	4D	PGSB	CDS	37816210	37816552	.	+	0	ID=CDS:AET4Gv20124900.1;Parent=transcript:AET4Gv20124900.1;protein_id=AET4Gv20124900.1
AeGRF5	4D	PGSB	exon	37817542	37817715	.	+	.	Parent=transcript:AET4Gv20124900.1;Name=AET4Gv20124900.3-E3;constitutive=0;ensembl_end_phase=1;ensembl_phase=1;exon_id=AET4Gv20124900.3-E3;rank=2
AeGRF5	4D	PGSB	CDS	37817542	37817715	.	+	2	ID=CDS:AET4Gv20124900.1;Parent=transcript:AET4Gv20124900.1;protein_id=AET4Gv20124900.1
AeGRF5	4D	PGSB	exon	37817862	37818216	.	+	.	Parent=transcript:AET4Gv20124900.1;Name=AET4Gv20124900.4-E2;constitutive=0;ensembl_end_phase=2;ensembl_phase=1;exon_id=AET4Gv20124900.4-E2;rank=3
AeGRF5	4D	PGSB	CDS	37817862	37818216	.	+	2	ID=CDS:AET4Gv20124900.1;Parent=transcript:AET4Gv20124900.1;protein_id=AET4Gv20124900.1
AeGRF5	4D	PGSB	CDS	37818836	37819700	.	+	1	ID=CDS:AET4Gv20124900.1;Parent=transcript:AET4Gv20124900.1;protein_id=AET4Gv20124900.1
AeGRF5	4D	PGSB	exon	37818836	37820070	.	+	.	Parent=transcript:AET4Gv20124900.1;Name=AET4Gv20124900.1-E4;constitutive=0;ensembl_end_phase=-1;ensembl_phase=2;exon_id=AET4Gv20124900.1-E4;rank=4
AeGRF5	4D	PGSB	three_prime_UTR	37819701	37820070	.	+	.	Parent=transcript:AET4Gv20124900.1
AeGRF6	6D	PGSB	mRNA	362564965	362566264	.	+	.	ID=transcript:AET6Gv20664900.2;Parent=gene:AET6Gv20664900;biotype=protein_coding;transcript_id=AET6Gv20664900.2
AeGRF6	6D	PGSB	five_prime_UTR	362564965	362565198	.	+	.	Parent=transcript:AET6Gv20664900.2
AeGRF6	6D	PGSB	exon	362564965	362565277	.	+	.	Parent=transcript:AET6Gv20664900.2;Name=AET6Gv20664900.2-E1;constitutive=0;ensembl_end_phase=1;ensembl_phase=-1;exon_id=AET6Gv20664900.2-E1;rank=1
AeGRF6	6D	PGSB	CDS	362565199	362565277	.	+	0	ID=CDS:AET6Gv20664900.2;Parent=transcript:AET6Gv20664900.2;protein_id=AET6Gv20664900.2
AeGRF6	6D	PGSB	exon	362565372	362565644	.	+	.	Parent=transcript:AET6Gv20664900.2;Name=AET6Gv20664900.2-E2;constitutive=0;ensembl_end_phase=1;ensembl_phase=1;exon_id=AET6Gv20664900.2-E2;rank=2
AeGRF6	6D	PGSB	CDS	362565372	362565644	.	+	2	ID=CDS:AET6Gv20664900.2;Parent=transcript:AET6Gv20664900.2;protein_id=AET6Gv20664900.2
AeGRF6	6D	PGSB	CDS	362565749	362566044	.	+	2	ID=CDS:AET6Gv20664900.2;Parent=transcript:AET6Gv20664900.2;protein_id=AET6Gv20664900.2
AeGRF6	6D	PGSB	exon	362565749	362566264	.	+	.	Parent=transcript:AET6Gv20664900.2;Name=AET6Gv20664900.2-E3;constitutive=0;ensembl_end_phase=-1;ensembl_phase=1;exon_id=AET6Gv20664900.2-E3;rank=3
AeGRF6	6D	PGSB	three_prime_UTR	362566045	362566264	.	+	.	Parent=transcript:AET6Gv20664900.2
AeGRF6	6D	PGSB	exon	362565372	362565644	.	+	.	Parent=transcript:AET6Gv20664900.5;Name=AET6Gv20664900.2-E2;constitutive=0;ensembl_end_phase=1;ensembl_phase=1;exon_id=AET6Gv20664900.2-E2;rank=2
AeGRF6	6D	PGSB	exon	362565372	362565644	.	+	.	Parent=transcript:AET6Gv20664900.6;Name=AET6Gv20664900.2-E2;constitutive=0;ensembl_end_phase=1;ensembl_phase=1;exon_id=AET6Gv20664900.2-E2;rank=2
AeGRF6	6D	PGSB	exon	362565372	362565644	.	+	.	Parent=transcript:AET6Gv20664900.7;Name=AET6Gv20664900.2-E2;constitutive=0;ensembl_end_phase=1;ensembl_phase=1;exon_id=AET6Gv20664900.2-E2;rank=2
AeGRF7	6D	PGSB	mRNA	377411606	377415412	.	-	.	ID=transcript:AET6Gv20686100.2;Parent=gene:AET6Gv20686100;biotype=protein_coding;transcript_id=AET6Gv20686100.2
AeGRF7	6D	PGSB	three_prime_UTR	377411606	377411893	.	-	.	Parent=transcript:AET6Gv20686100.2
AeGRF7	6D	PGSB	exon	377411606	377412383	.	-	.	Parent=transcript:AET6Gv20686100.2;Name=AET6Gv20686100.2-E3;constitutive=0;ensembl_end_phase=-1;ensembl_phase=2;exon_id=AET6Gv20686100.2-E3;rank=3
AeGRF7	6D	PGSB	CDS	377411894	377412383	.	-	1	ID=CDS:AET6Gv20686100.2;Parent=transcript:AET6Gv20686100.2;protein_id=AET6Gv20686100.2
AeGRF7	6D	PGSB	exon	377413834	377414248	.	-	.	Parent=transcript:AET6Gv20686100.2;Name=AET6Gv20686100.5-E3;constitutive=0;ensembl_end_phase=2;ensembl_phase=1;exon_id=AET6Gv20686100.5-E3;rank=2
AeGRF7	6D	PGSB	CDS	377413834	377414248	.	-	2	ID=CDS:AET6Gv20686100.2;Parent=transcript:AET6Gv20686100.2;protein_id=AET6Gv20686100.2
AeGRF7	6D	PGSB	CDS	377414752	377414986	.	-	0	ID=CDS:AET6Gv20686100.2;Parent=transcript:AET6Gv20686100.2;protein_id=AET6Gv20686100.2
AeGRF7	6D	PGSB	exon	377414752	377415412	.	-	.	Parent=transcript:AET6Gv20686100.2;Name=AET6Gv20686100.2-E1;constitutive=0;ensembl_end_phase=1;ensembl_phase=-1;exon_id=AET6Gv20686100.2-E1;rank=1
AeGRF7	6D	PGSB	five_prime_UTR	377414987	377415412	.	-	.	Parent=transcript:AET6Gv20686100.2
AeGRF8	6D	PGSB	mRNA	447881010	447882445	.	-	.	ID=transcript:AET6Gv20825100.3;Parent=gene:AET6Gv20825100;biotype=protein_coding;transcript_id=AET6Gv20825100.3
AeGRF8	6D	PGSB	exon	447881010	447881017	.	-	.	Parent=transcript:AET6Gv20825100.3;Name=AET6Gv20825100.3-E3;constitutive=0;ensembl_end_phase=0;ensembl_phase=1;exon_id=AET6Gv20825100.3-E3;rank=3
AeGRF8	6D	PGSB	CDS	447881010	447881017	.	-	2	ID=CDS:AET6Gv20825100.3;Parent=transcript:AET6Gv20825100.3;protein_id=AET6Gv20825100.3
AeGRF8	6D	PGSB	exon	447881100	447882104	.	-	.	Parent=transcript:AET6Gv20825100.3;Name=AET6Gv20825100.3-E2;constitutive=0;ensembl_end_phase=1;ensembl_phase=1;exon_id=AET6Gv20825100.3-E2;rank=2
AeGRF8	6D	PGSB	CDS	447881100	447882104	.	-	2	ID=CDS:AET6Gv20825100.3;Parent=transcript:AET6Gv20825100.3;protein_id=AET6Gv20825100.3
AeGRF8	6D	PGSB	exon	447882214	447882445	.	-	.	Parent=transcript:AET6Gv20825100.3;Name=AET6Gv20825100.3-E1;constitutive=0;ensembl_end_phase=1;ensembl_phase=0;exon_id=AET6Gv20825100.3-E1;rank=1
AeGRF8	6D	PGSB	CDS	447882214	447882445	.	-	0	ID=CDS:AET6Gv20825100.3;Parent=transcript:AET6Gv20825100.3;protein_id=AET6Gv20825100.3
AeGRF8	6D	PGSB	exon	447881010	447881017	.	-	.	Parent=transcript:AET6Gv20825100.2;Name=AET6Gv20825100.3-E3;constitutive=0;ensembl_end_phase=0;ensembl_phase=1;exon_id=AET6Gv20825100.3-E3;rank=4
AeGRF8	6D	PGSB	exon	447882214	447882445	.	-	.	Parent=transcript:AET6Gv20825100.4;Name=AET6Gv20825100.3-E1;constitutive=0;ensembl_end_phase=1;ensembl_phase=0;exon_id=AET6Gv20825100.3-E1;rank=1
AeGRF9	7D	PGSB	mRNA	21622189	21625267	.	-	.	ID=transcript:AET7Gv20107900.4;Parent=gene:AET7Gv20107900;biotype=protein_coding;transcript_id=AET7Gv20107900.4
AeGRF9	7D	PGSB	three_prime_UTR	21622189	21622493	.	-	.	Parent=transcript:AET7Gv20107900.4
AeGRF9	7D	PGSB	exon	21622189	21622501	.	-	.	Parent=transcript:AET7Gv20107900.4;Name=AET7Gv20107900.4-E5;constitutive=0;ensembl_end_phase=-1;ensembl_phase=1;exon_id=AET7Gv20107900.4-E5;rank=5
AeGRF9	7D	PGSB	CDS	21622494	21622501	.	-	2	ID=CDS:AET7Gv20107900.4;Parent=transcript:AET7Gv20107900.4;protein_id=AET7Gv20107900.4
AeGRF9	7D	PGSB	exon	21622586	21622721	.	-	.	Parent=transcript:AET7Gv20107900.4;Name=AET7Gv20107900.4-E4;constitutive=0;ensembl_end_phase=1;ensembl_phase=0;exon_id=AET7Gv20107900.4-E4;rank=4
AeGRF9	7D	PGSB	CDS	21622586	21622721	.	-	0	ID=CDS:AET7Gv20107900.4;Parent=transcript:AET7Gv20107900.4;protein_id=AET7Gv20107900.4
AeGRF9	7D	PGSB	exon	21622830	21623052	.	-	.	Parent=transcript:AET7Gv20107900.4;Name=AET7Gv20107900.4-E3;constitutive=0;ensembl_end_phase=0;ensembl_phase=2;exon_id=AET7Gv20107900.4-E3;rank=3
AeGRF9	7D	PGSB	CDS	21622830	21623052	.	-	1	ID=CDS:AET7Gv20107900.4;Parent=transcript:AET7Gv20107900.4;protein_id=AET7Gv20107900.4
AeGRF9	7D	PGSB	exon	21624056	21624398	.	-	.	Parent=transcript:AET7Gv20107900.4;Name=AET7Gv20107900.5-E2;constitutive=0;ensembl_end_phase=2;ensembl_phase=1;exon_id=AET7Gv20107900.5-E2;rank=2
AeGRF9	7D	PGSB	CDS	21624056	21624398	.	-	2	ID=CDS:AET7Gv20107900.4;Parent=transcript:AET7Gv20107900.4;protein_id=AET7Gv20107900.4
AeGRF9	7D	PGSB	CDS	21624850	21625132	.	-	0	ID=CDS:AET7Gv20107900.4;Parent=transcript:AET7Gv20107900.4;protein_id=AET7Gv20107900.4
AeGRF9	7D	PGSB	exon	21624850	21625267	.	-	.	Parent=transcript:AET7Gv20107900.4;Name=AET7Gv20107900.4-E1;constitutive=0;ensembl_end_phase=1;ensembl_phase=-1;exon_id=AET7Gv20107900.4-E1;rank=1
AeGRF9	7D	PGSB	five_prime_UTR	21625133	21625267	.	-	.	Parent=transcript:AET7Gv20107900.4
AeGRF9	7D	PGSB	exon	21624850	21625267	.	-	.	Parent=transcript:AET7Gv20107900.6;Name=AET7Gv20107900.4-E1;constitutive=0;ensembl_end_phase=1;ensembl_phase=-1;exon_id=AET7Gv20107900.4-E1;rank=1
AeGRF10	7D	PGSB	mRNA	119235416	119236497	.	+	.	ID=transcript:AET7Gv20433900.2;Parent=gene:AET7Gv20433900;biotype=protein_coding;transcript_id=AET7Gv20433900.2
AeGRF10	7D	PGSB	exon	119235416	119235638	.	+	.	Parent=transcript:AET7Gv20433900.2;Name=AET7Gv20433900.2-E1;constitutive=0;ensembl_end_phase=1;ensembl_phase=0;exon_id=AET7Gv20433900.2-E1;rank=1
AeGRF10	7D	PGSB	CDS	119235416	119235638	.	+	0	ID=CDS:AET7Gv20433900.2;Parent=transcript:AET7Gv20433900.2;protein_id=AET7Gv20433900.2
AeGRF10	7D	PGSB	exon	119235761	119236497	.	+	.	Parent=transcript:AET7Gv20433900.2;Name=AET7Gv20433900.2-E2;constitutive=0;ensembl_end_phase=0;ensembl_phase=1;exon_id=AET7Gv20433900.2-E2;rank=2
AeGRF10	7D	PGSB	CDS	119235761	119236497	.	+	2	ID=CDS:AET7Gv20433900.2;Parent=transcript:AET7Gv20433900.2;protein_id=AET7Gv20433900.2
TuGRF1	Tu2	IGDB_Final	mRNA	631777900	631778973	.	-	.	ID=TuG1812G0200004500.01.T01;Name=TuG1812G0200004500.01.T01;Parent=TuG1812G0200004500.01;
TuGRF1	Tu2	IGDB_Final	exon	631778697	631778973	.	-	-1	ID=exon458786;Name=exon458786;Parent=TuG1812G0200004500.01.T01
TuGRF1	Tu2	IGDB_Final	exon	631777900	631778567	.	-	1	ID=exon458787;Name=exon458787;Parent=TuG1812G0200004500.01.T01
TuGRF1	Tu2	IGDB_Final	start_codon	631778953	631778955	.	-	.	Parent=TuG1812G0200004500.01.T01
TuGRF1	Tu2	IGDB_Final	CDS	631778697	631778955	.	-	-1	ID=cds458786;Name=cds458786;Parent=TuG1812G0200004500.01.T01
TuGRF1	Tu2	IGDB_Final	CDS	631778239	631778567	.	-	1	ID=cds458787;Name=cds458787;Parent=TuG1812G0200004500.01.T01
TuGRF1	Tu2	IGDB_Final	stop_codon	631778239	631778241	.	-	.	Parent=TuG1812G0200004500.01.T01
TuGRF1	Tu2	IGDB_Final	five_prime_utr	631778956	631778973	.	-	.	ID=5utr118480;Parent=TuG1812G0200004500.01.T01
TuGRF1	Tu2	IGDB_Final	three_prime_utr	631777900	631778238	.	-	.	ID=3utr118480;Parent=TuG1812G0200004500.01.T01
TuGRF2	Tu2	IGDB_Final	mRNA	665117961	665121708	.	+	.	ID=TuG1812G0200004855.01.T01;Name=TuG1812G0200004855.01.T01;Parent=TuG1812G0200004855.01;
TuGRF2	Tu2	IGDB_Final	exon	665117961	665118232	.	+	-1	ID=exon273449;Name=exon273449;Parent=TuG1812G0200004855.01.T01
TuGRF2	Tu2	IGDB_Final	exon	665118349	665118581	.	+	2	ID=exon273450;Name=exon273450;Parent=TuG1812G0200004855.01.T01
TuGRF2	Tu2	IGDB_Final	exon	665119434	665119797	.	+	1	ID=exon273451;Name=exon273451;Parent=TuG1812G0200004855.01.T01
TuGRF2	Tu2	IGDB_Final	exon	665120856	665121708	.	+	2	ID=exon273452;Name=exon273452;Parent=TuG1812G0200004855.01.T01
TuGRF2	Tu2	IGDB_Final	start_codon	665118141	665118143	.	+	.	Parent=TuG1812G0200004855.01.T01
TuGRF2	Tu2	IGDB_Final	CDS	665118141	665118232	.	+	-1	ID=cds273449;Name=cds273449;Parent=TuG1812G0200004855.01.T01
TuGRF2	Tu2	IGDB_Final	CDS	665118349	665118581	.	+	2	ID=cds273450;Name=cds273450;Parent=TuG1812G0200004855.01.T01
TuGRF2	Tu2	IGDB_Final	CDS	665119434	665119797	.	+	1	ID=cds273451;Name=cds273451;Parent=TuG1812G0200004855.01.T01
TuGRF2	Tu2	IGDB_Final	CDS	665120856	665121321	.	+	2	ID=cds273452;Name=cds273452;Parent=TuG1812G0200004855.01.T01
TuGRF2	Tu2	IGDB_Final	stop_codon	665121319	665121321	.	+	.	Parent=TuG1812G0200004855.01.T01
TuGRF2	Tu2	IGDB_Final	five_prime_utr	665117961	665118140	.	+	.	ID=5utr70690;Parent=TuG1812G0200004855.01.T01
TuGRF2	Tu2	IGDB_Final	three_prime_utr	665121322	665121708	.	+	.	ID=3utr70690;Parent=TuG1812G0200004855.01.T01
TuGRF3	Tu2	IGDB_Final	mRNA	709297066	709299859	.	-	.	ID=TuG1812G0200005465.01.T01;Name=TuG1812G0200005465.01.T01;Parent=TuG1812G0200005465.01;
TuGRF3	Tu2	IGDB_Final	exon	709299243	709299859	.	-	-1	ID=exon351582;Name=exon351582;Parent=TuG1812G0200005465.01.T01
TuGRF3	Tu2	IGDB_Final	exon	709298197	709298421	.	-	1	ID=exon351583;Name=exon351583;Parent=TuG1812G0200005465.01.T01
TuGRF3	Tu2	IGDB_Final	exon	709297066	709297895	.	-	1	ID=exon351584;Name=exon351584;Parent=TuG1812G0200005465.01.T01
TuGRF3	Tu2	IGDB_Final	start_codon	709299496	709299498	.	-	.	Parent=TuG1812G0200005465.01.T01
TuGRF3	Tu2	IGDB_Final	CDS	709299243	709299498	.	-	-1	ID=cds351582;Name=cds351582;Parent=TuG1812G0200005465.01.T01
TuGRF3	Tu2	IGDB_Final	CDS	709298197	709298421	.	-	1	ID=cds351583;Name=cds351583;Parent=TuG1812G0200005465.01.T01
TuGRF3	Tu2	IGDB_Final	CDS	709297579	709297895	.	-	1	ID=cds351584;Name=cds351584;Parent=TuG1812G0200005465.01.T01
TuGRF3	Tu2	IGDB_Final	stop_codon	709297579	709297581	.	-	.	Parent=TuG1812G0200005465.01.T01
TuGRF3	Tu2	IGDB_Final	five_prime_utr	709299499	709299859	.	-	.	ID=5utr90813;Parent=TuG1812G0200005465.01.T01
TuGRF3	Tu2	IGDB_Final	three_prime_utr	709297066	709297578	.	-	.	ID=3utr90813;Parent=TuG1812G0200005465.01.T01
TuGRF4	Tu6	IGDB_Final	mRNA	449820741	449821799	.	+	.	ID=TuG1812G0600002856.01.T01;Name=TuG1812G0600002856.01.T01;Parent=TuG1812G0600002856.01;
TuGRF4	Tu6	IGDB_Final	exon	449820741	449820900	.	+	-1	ID=exon273050;Name=exon273050;Parent=TuG1812G0600002856.01.T01
TuGRF4	Tu6	IGDB_Final	exon	449820998	449821261	.	+	1	ID=exon273051;Name=exon273051;Parent=TuG1812G0600002856.01.T01
TuGRF4	Tu6	IGDB_Final	exon	449821342	449821799	.	+	1	ID=exon273052;Name=exon273052;Parent=TuG1812G0600002856.01.T01
TuGRF4	Tu6	IGDB_Final	start_codon	449820822	449820824	.	+	.	Parent=TuG1812G0600002856.01.T01
TuGRF4	Tu6	IGDB_Final	CDS	449820822	449820900	.	+	-1	ID=cds273050;Name=cds273050;Parent=TuG1812G0600002856.01.T01
TuGRF4	Tu6	IGDB_Final	CDS	449820998	449821261	.	+	1	ID=cds273051;Name=cds273051;Parent=TuG1812G0600002856.01.T01
TuGRF4	Tu6	IGDB_Final	CDS	449821342	449821637	.	+	1	ID=cds273052;Name=cds273052;Parent=TuG1812G0600002856.01.T01
TuGRF4	Tu6	IGDB_Final	stop_codon	449821635	449821637	.	+	.	Parent=TuG1812G0600002856.01.T01
TuGRF4	Tu6	IGDB_Final	five_prime_utr	449820741	449820821	.	+	.	ID=5utr70602;Parent=TuG1812G0600002856.01.T01
TuGRF4	Tu6	IGDB_Final	three_prime_utr	449821638	449821799	.	+	.	ID=3utr70602;Parent=TuG1812G0600002856.01.T01
TuGRF5	Tu6	IGDB_Final	mRNA	527002145	527004032	.	-	.	ID=TuG1812G0600003593.01.T01;Name=TuG1812G0600003593.01.T01;Parent=TuG1812G0600003593.01;
TuGRF5	Tu6	IGDB_Final	exon	527003753	527004032	.	-	-1	ID=exon316433;Name=exon316433;Parent=TuG1812G0600003593.01.T01
TuGRF5	Tu6	IGDB_Final	exon	527002653	527003642	.	-	1	ID=exon316434;Name=exon316434;Parent=TuG1812G0600003593.01.T01
TuGRF5	Tu6	IGDB_Final	exon	527002145	527002567	.	-	1	ID=exon316435;Name=exon316435;Parent=TuG1812G0600003593.01.T01
TuGRF5	Tu6	IGDB_Final	start_codon	527003982	527003984	.	-	.	Parent=TuG1812G0600003593.01.T01
TuGRF5	Tu6	IGDB_Final	CDS	527003753	527003984	.	-	-1	ID=cds316433;Name=cds316433;Parent=TuG1812G0600003593.01.T01
TuGRF5	Tu6	IGDB_Final	CDS	527002653	527003642	.	-	1	ID=cds316434;Name=cds316434;Parent=TuG1812G0600003593.01.T01
TuGRF5	Tu6	IGDB_Final	CDS	527002560	527002567	.	-	1	ID=cds316435;Name=cds316435;Parent=TuG1812G0600003593.01.T01
TuGRF5	Tu6	IGDB_Final	stop_codon	527002560	527002562	.	-	.	Parent=TuG1812G0600003593.01.T01
TuGRF5	Tu6	IGDB_Final	five_prime_utr	527003985	527004032	.	-	.	ID=5utr81720;Parent=TuG1812G0600003593.01.T01
TuGRF5	Tu6	IGDB_Final	three_prime_utr	527002145	527002559	.	-	.	ID=3utr81720;Parent=TuG1812G0600003593.01.T01
TuGRF6	Tu7	IGDB_Final	mRNA	120311080	120312467	.	+	.	ID=TuG1812G0700001763.01.T01;Name=TuG1812G0700001763.01.T01;Parent=TuG1812G0700001763.01;
TuGRF6	Tu7	IGDB_Final	exon	120311080	120311468	.	+	-1	ID=exon340405;Name=exon340405;Parent=TuG1812G0700001763.01.T01
TuGRF6	Tu7	IGDB_Final	exon	120311590	120312294	.	+	1	ID=exon340406;Name=exon340406;Parent=TuG1812G0700001763.01.T01
TuGRF6	Tu7	IGDB_Final	exon	120312395	120312467	.	+	1	ID=exon340407;Name=exon340407;Parent=TuG1812G0700001763.01.T01
TuGRF6	Tu7	IGDB_Final	start_codon	120311249	120311251	.	+	.	Parent=TuG1812G0700001763.01.T01
TuGRF6	Tu7	IGDB_Final	CDS	120311249	120311468	.	+	-1	ID=cds340405;Name=cds340405;Parent=TuG1812G0700001763.01.T01
TuGRF6	Tu7	IGDB_Final	CDS	120311590	120312294	.	+	1	ID=cds340406;Name=cds340406;Parent=TuG1812G0700001763.01.T01
TuGRF6	Tu7	IGDB_Final	CDS	120312395	120312405	.	+	1	ID=cds340407;Name=cds340407;Parent=TuG1812G0700001763.01.T01
TuGRF6	Tu7	IGDB_Final	stop_codon	120312403	120312405	.	+	.	Parent=TuG1812G0700001763.01.T01
TuGRF6	Tu7	IGDB_Final	five_prime_utr	120311080	120311248	.	+	.	ID=5utr87849;Parent=TuG1812G0700001763.01.T01
TuGRF6	Tu7	IGDB_Final	three_prime_utr	120312406	120312467	.	+	.	ID=3utr87849;Parent=TuG1812G0700001763.01.T01
