# Supplementary material for: Genome-wide analysis of growth-regulating factors (GRFs) in Triticum aestivum
Source: PeerJ. 2021 Jan 19;9:e10701. doi: 10.7717/peerj.10701 (PMC7821759; doi:10.7717/peerj.10701)
Supplement: Table S4 [file peerj-09-10701-s004.xlsx]

## Sheet: Sheet1
Table S4. Information of 20 Motifs
Motif	Best possible match
motif 1	YYGKSLDPEPGRCRRTDGKKWRCSREAVPDSKYCERHMHR
motif 2	GARAPFTAAQWQELEHQALIYKYLAAGVPVPPDLVLPIRRSVAAASARAY
motif 3	GRNRSRKPVETQLASPAHPPS
motif 4	KQENQPLRPFFDEWPKDRDSW
motif 5	NSNMGSFSETQLSISIPMTSS
motif 6	GCKDFRYTAYGVRTEAPEESN
motif 7	QHHECEGGNGQDTLKQLGGMEPKNTNPGSLFPGSGEHHNHA
motif 8	VTMAAPSPLVLGLGLGLGGSS
motif 9	MAMPYASLSPAADYHRSSPAT
motif 10	ISAERSZZQQPLSFGGGGDGG
motif 11	ENENEAILQPVPQDSSMHSEGEEEENKNN
motif 12	FPSLAGLGSLC
motif 13	RPGSVSVETDEPDRAEYSKSYDGNPREGGGKTVVNSPSSKK
motif 14	APPQQLGFSNAASPYAAHGAA
motif 15	PLPPLPLGLDTTGPHPPPAGYSQMDVDKDSYGYGHSLGEKHGGGELAFFS
motif 16	LMTEAMNTSVENPWRLPPSSQTTTFPLSSYAPQLGATSDLGQNNNSNN
motif 17	ICHEQQPLKNYAASTIDPCSLQYNREMVSK
motif 18	GDSDAVSEAVKAAAPYLLGTCSPGHGREKMLSFSSSQ
motif 19	LSVSAAPMASSDLSSASTSPIHEKLMLSPLKLSREYSPIGLSV
motif 20	AAGFHSHSPYPAIGGGGGG
