# Supplementary material for: Genome-wide analysis of growth-regulating factors (GRFs) in Triticum aestivum
Source: PeerJ. 2021 Jan 19;9:e10701. doi: 10.7717/peerj.10701 (PMC7821759; doi:10.7717/peerj.10701)
Supplement: Table S5 [file peerj-09-10701-s005.xlsx]

## Sheet: Sheet1
Table S5. Cis-elements in Promoter of TaGRF Genes
Name	ID	Element	Sequence	Length	Start	End
TaGRF1-2A	TraesCS2A02G238700.1	AE-box	AGAAACAA	8	1432	1440
TaGRF1-2A	TraesCS2A02G238700.1	ARE	AAACCA	6	619	625
TaGRF1-2A	TraesCS2A02G238700.1	Box 4	ATTAAT	6	1020	1026
TaGRF1-2A	TraesCS2A02G238700.1	CAAT-box	CAAAT	5	134	139
TaGRF1-2A	TraesCS2A02G238700.1	CAAT-box	CCAAT	5	457	462
TaGRF1-2A	TraesCS2A02G238700.1	CAAT-box	CAAAT	5	487	492
TaGRF1-2A	TraesCS2A02G238700.1	CAAT-box	CAAAT	5	506	511
TaGRF1-2A	TraesCS2A02G238700.1	CAAT-box	CAAAT	5	609	614
TaGRF1-2A	TraesCS2A02G238700.1	CAAT-box	CAAAT	5	705	710
TaGRF1-2A	TraesCS2A02G238700.1	CAAT-box	CAAAT	5	1007	1012
TaGRF1-2A	TraesCS2A02G238700.1	CAAT-box	CAAAT	5	1017	1022
TaGRF1-2A	TraesCS2A02G238700.1	CAAT-box	CAAAT	5	1222	1227
TaGRF1-2A	TraesCS2A02G238700.1	CAT-box	GCCACT	6	180	186
TaGRF1-2A	TraesCS2A02G238700.1	CAT-box	GCCACT	6	379	385
TaGRF1-2A	TraesCS2A02G238700.1	CGTCA-motif	CGTCA	5	214	219
TaGRF1-2A	TraesCS2A02G238700.1	CGTCA-motif	CGTCA	5	251	256
TaGRF1-2A	TraesCS2A02G238700.1	CGTCA-motif	CGTCA	5	283	288
TaGRF1-2A	TraesCS2A02G238700.1	CGTCA-motif	CGTCA	5	1150	1155
TaGRF1-2A	TraesCS2A02G238700.1	CGTCA-motif	CGTCA	5	1216	1221
TaGRF1-2A	TraesCS2A02G238700.1	I-box	GTATAAGGCC	9	1082	1091
TaGRF1-2A	TraesCS2A02G238700.1	MBS	CAACTG	6	983	989
TaGRF1-2A	TraesCS2A02G238700.1	TATA-box	TATAA	5	48	53
TaGRF1-2A	TraesCS2A02G238700.1	TATA-box	TATA	4	49	53
TaGRF1-2A	TraesCS2A02G238700.1	TATA-box	TATA	4	615	619
TaGRF1-2A	TraesCS2A02G238700.1	TATA-box	TATA	4	866	870
TaGRF1-2A	TraesCS2A02G238700.1	TATA-box	TATA	4	874	878
TaGRF1-2A	TraesCS2A02G238700.1	TATA-box	TACATAAA	8	1089	1097
TaGRF1-2A	TraesCS2A02G238700.1	TGACG-motif	TGACG	5	214	219
TaGRF1-2A	TraesCS2A02G238700.1	TGACG-motif	TGACG	5	251	256
TaGRF1-2A	TraesCS2A02G238700.1	TGACG-motif	TGACG	5	283	288
TaGRF1-2A	TraesCS2A02G238700.1	TGACG-motif	TGACG	5	1150	1155
TaGRF1-2A	TraesCS2A02G238700.1	TGACG-motif	TGACG	5	1216	1221
TaGRF1-2A	TraesCS2A02G238700.1	TGA-element	AACGAC	6	594	600
TaGRF1-2A	TraesCS2A02G238700.1	TGA-element	AACGAC	6	1296	1302
TaGRF1-2B	TraesCS2B02G256600.1	ARE	AAACCA	6	983	989
TaGRF1-2B	TraesCS2B02G256600.1	CAAT-box	CAAAT	5	13	18
TaGRF1-2B	TraesCS2B02G256600.1	CAAT-box	CAAAT	5	56	61
TaGRF1-2B	TraesCS2B02G256600.1	CAAT-box	CCAAT	5	131	136
TaGRF1-2B	TraesCS2B02G256600.1	CAAT-box	CCAAT	5	171	176
TaGRF1-2B	TraesCS2B02G256600.1	CAAT-box	CAAAT	5	188	193
TaGRF1-2B	TraesCS2B02G256600.1	CAAT-box	CCAAT	5	267	272
TaGRF1-2B	TraesCS2B02G256600.1	CAAT-box	CAAAT	5	497	502
TaGRF1-2B	TraesCS2B02G256600.1	CAAT-box	CCAAT	5	820	825
TaGRF1-2B	TraesCS2B02G256600.1	CAAT-box	CAAAT	5	850	855
TaGRF1-2B	TraesCS2B02G256600.1	CAAT-box	CAAAT	5	869	874
TaGRF1-2B	TraesCS2B02G256600.1	CAAT-box	CAAAT	5	973	978
TaGRF1-2B	TraesCS2B02G256600.1	CAAT-box	CAAAT	5	1069	1074
TaGRF1-2B	TraesCS2B02G256600.1	CAAT-box	CAAAT	5	1371	1376
TaGRF1-2B	TraesCS2B02G256600.1	CAAT-box	CAAAT	5	1381	1386
TaGRF1-2B	TraesCS2B02G256600.1	CAT-box	GCCACT	6	543	549
TaGRF1-2B	TraesCS2B02G256600.1	CAT-box	GCCACT	6	742	748
TaGRF1-2B	TraesCS2B02G256600.1	CGTCA-motif	CGTCA	5	577	582
TaGRF1-2B	TraesCS2B02G256600.1	CGTCA-motif	CGTCA	5	646	651
TaGRF1-2B	TraesCS2B02G256600.1	G-box	CACGAC	6	303	309
TaGRF1-2B	TraesCS2B02G256600.1	GCN4_motif	TGAGTCA	7	229	236
TaGRF1-2B	TraesCS2B02G256600.1	MBS	CAACTG	6	143	149
TaGRF1-2B	TraesCS2B02G256600.1	MBS	CAACTG	6	1347	1353
TaGRF1-2B	TraesCS2B02G256600.1	O2-site	GATGATGTGG	9	503	512
TaGRF1-2B	TraesCS2B02G256600.1	TATA-box	ATTATA	6	117	123
TaGRF1-2B	TraesCS2B02G256600.1	TATA-box	TATAA	5	118	123
TaGRF1-2B	TraesCS2B02G256600.1	TATA-box	TATA	4	119	123
TaGRF1-2B	TraesCS2B02G256600.1	TATA-box	TATA	4	324	328
TaGRF1-2B	TraesCS2B02G256600.1	TATA-box	TATAA	5	411	416
TaGRF1-2B	TraesCS2B02G256600.1	TATA-box	TATA	4	412	416
TaGRF1-2B	TraesCS2B02G256600.1	TATA-box	TATA	4	1230	1234
TaGRF1-2B	TraesCS2B02G256600.1	TATA-box	TATA	4	1238	1242
TaGRF1-2B	TraesCS2B02G256600.1	TATA-box	TACATAAA	8	1453	1461
TaGRF1-2B	TraesCS2B02G256600.1	TGACG-motif	TGACG	5	577	582
TaGRF1-2B	TraesCS2B02G256600.1	TGACG-motif	TGACG	5	646	651
TaGRF1-2B	TraesCS2B02G256600.1	TGA-element	AACGAC	6	957	963
TaGRF1-2D	TraesCS2D02G246600.1	ARE	AAACCA	6	928	934
TaGRF1-2D	TraesCS2D02G246600.1	Box 4	ATTAAT	6	1329	1335
TaGRF1-2D	TraesCS2D02G246600.1	CAAT-box	CAAAT	5	2	7
TaGRF1-2D	TraesCS2D02G246600.1	CAAT-box	CCAAT	5	77	82
TaGRF1-2D	TraesCS2D02G246600.1	CAAT-box	CAAAT	5	134	139
TaGRF1-2D	TraesCS2D02G246600.1	CAAT-box	CCAAT	5	213	218
TaGRF1-2D	TraesCS2D02G246600.1	CAAT-box	CAAAT	5	442	447
TaGRF1-2D	TraesCS2D02G246600.1	CAAT-box	CCAAT	5	765	770
TaGRF1-2D	TraesCS2D02G246600.1	CAAT-box	CAAAT	5	795	800
TaGRF1-2D	TraesCS2D02G246600.1	CAAT-box	CAAAT	5	814	819
TaGRF1-2D	TraesCS2D02G246600.1	CAAT-box	CAAAT	5	918	923
TaGRF1-2D	TraesCS2D02G246600.1	CAAT-box	CAAAT	5	1014	1019
TaGRF1-2D	TraesCS2D02G246600.1	CAAT-box	CAAAT	5	1316	1321
TaGRF1-2D	TraesCS2D02G246600.1	CAAT-box	CAAAT	5	1326	1331
TaGRF1-2D	TraesCS2D02G246600.1	CAT-box	GCCACT	6	116	122
TaGRF1-2D	TraesCS2D02G246600.1	CAT-box	GCCACT	6	488	494
TaGRF1-2D	TraesCS2D02G246600.1	CAT-box	GCCACT	6	687	693
TaGRF1-2D	TraesCS2D02G246600.1	CGTCA-motif	CGTCA	5	559	564
TaGRF1-2D	TraesCS2D02G246600.1	CGTCA-motif	CGTCA	5	591	596
TaGRF1-2D	TraesCS2D02G246600.1	CGTCA-motif	CGTCA	5	1459	1464
TaGRF1-2D	TraesCS2D02G246600.1	G-box	CACGAC	6	249	255
TaGRF1-2D	TraesCS2D02G246600.1	GCN4_motif	TGAGTCA	7	175	182
TaGRF1-2D	TraesCS2D02G246600.1	I-box	GTATAAGGCC	9	1391	1400
TaGRF1-2D	TraesCS2D02G246600.1	MBS	CAACTG	6	89	95
TaGRF1-2D	TraesCS2D02G246600.1	MBS	CAACTG	6	1292	1298
TaGRF1-2D	TraesCS2D02G246600.1	TATA-box	ATTATA	6	63	69
TaGRF1-2D	TraesCS2D02G246600.1	TATA-box	TATAA	5	64	69
TaGRF1-2D	TraesCS2D02G246600.1	TATA-box	TATA	4	65	69
TaGRF1-2D	TraesCS2D02G246600.1	TATA-box	TATA	4	270	274
TaGRF1-2D	TraesCS2D02G246600.1	TATA-box	TATAA	5	356	361
TaGRF1-2D	TraesCS2D02G246600.1	TATA-box	TATA	4	357	361
TaGRF1-2D	TraesCS2D02G246600.1	TATA-box	TATA	4	924	928
TaGRF1-2D	TraesCS2D02G246600.1	TATA-box	TATA	4	1175	1179
TaGRF1-2D	TraesCS2D02G246600.1	TATA-box	TATA	4	1183	1187
TaGRF1-2D	TraesCS2D02G246600.1	TATA-box	TACATAAA	8	1398	1406
TaGRF1-2D	TraesCS2D02G246600.1	TGACG-motif	TGACG	5	559	564
TaGRF1-2D	TraesCS2D02G246600.1	TGACG-motif	TGACG	5	591	596
TaGRF1-2D	TraesCS2D02G246600.1	TGACG-motif	TGACG	5	1459	1464
TaGRF1-2D	TraesCS2D02G246600.1	TGA-element	AACGAC	6	902	908
TaGRF2-2A	TraesCS2A02G398300.1	A-box	CCGTCC	6	295	301
TaGRF2-2A	TraesCS2A02G398300.1	A-box	CCGTCC	6	417	423
TaGRF2-2A	TraesCS2A02G398300.1	A-box	CCGTCC	6	889	895
TaGRF2-2A	TraesCS2A02G398300.1	A-box	CCGTCC	6	1031	1037
TaGRF2-2A	TraesCS2A02G398300.1	ABRE	ACGTG	5	357	362
TaGRF2-2A	TraesCS2A02G398300.1	ABRE	ACGTG	5	618	623
TaGRF2-2A	TraesCS2A02G398300.1	ABRE	CGTACGTGCA	9	616	625
TaGRF2-2A	TraesCS2A02G398300.1	ABRE	GCCGCGTGGC	9	781	790
TaGRF2-2A	TraesCS2A02G398300.1	ABRE	ACGTG	5	919	924
TaGRF2-2A	TraesCS2A02G398300.1	Box 4	ATTAAT	6	903	909
TaGRF2-2A	TraesCS2A02G398300.1	CAAT-box	CCAAT	5	533	538
TaGRF2-2A	TraesCS2A02G398300.1	CAT-box	GCCACT	6	406	412
TaGRF2-2A	TraesCS2A02G398300.1	CAT-box	GCCACT	6	492	498
TaGRF2-2A	TraesCS2A02G398300.1	C-box	ACGAGCACCGCC	11	397	408
TaGRF2-2A	TraesCS2A02G398300.1	CGTCA-motif	CGTCA	5	14	19
TaGRF2-2A	TraesCS2A02G398300.1	CGTCA-motif	CGTCA	5	160	165
TaGRF2-2A	TraesCS2A02G398300.1	CGTCA-motif	CGTCA	5	767	772
TaGRF2-2A	TraesCS2A02G398300.1	CGTCA-motif	CGTCA	5	921	926
TaGRF2-2A	TraesCS2A02G398300.1	CGTCA-motif	CGTCA	5	994	999
TaGRF2-2A	TraesCS2A02G398300.1	G-box	CACGTC	6	356	362
TaGRF2-2A	TraesCS2A02G398300.1	G-box	TACGTG	6	618	624
TaGRF2-2A	TraesCS2A02G398300.1	G-box	CACGTC	6	919	925
TaGRF2-2A	TraesCS2A02G398300.1	GC-motif	CCCCCG	6	208	214
TaGRF2-2A	TraesCS2A02G398300.1	GC-motif	CCCCCG	6	1020	1026
TaGRF2-2A	TraesCS2A02G398300.1	LTR	CCGAAA	6	567	573
TaGRF2-2A	TraesCS2A02G398300.1	O2-site	GATGATGTGG	9	300	309
TaGRF2-2A	TraesCS2A02G398300.1	Sp1	GGGCGG	6	178	184
TaGRF2-2A	TraesCS2A02G398300.1	Sp1	GGGCGG	6	643	649
TaGRF2-2A	TraesCS2A02G398300.1	TGACG-motif	TGACG	5	14	19
TaGRF2-2A	TraesCS2A02G398300.1	TGACG-motif	TGACG	5	160	165
TaGRF2-2A	TraesCS2A02G398300.1	TGACG-motif	TGACG	5	767	772
TaGRF2-2A	TraesCS2A02G398300.1	TGACG-motif	TGACG	5	921	926
TaGRF2-2A	TraesCS2A02G398300.1	TGACG-motif	TGACG	5	994	999
TaGRF2-2B	TraesCS2B02G416300.1	A-box	CCGTCC	6	17	23
TaGRF2-2B	TraesCS2B02G416300.1	A-box	CCGTCC	6	643	649
TaGRF2-2B	TraesCS2B02G416300.1	A-box	CCGTCC	6	1098	1104
TaGRF2-2B	TraesCS2B02G416300.1	A-box	CCGTCC	6	1224	1230
TaGRF2-2B	TraesCS2B02G416300.1	ABRE	ACGTG	5	583	588
TaGRF2-2B	TraesCS2B02G416300.1	ABRE	ACGTG	5	827	832
TaGRF2-2B	TraesCS2B02G416300.1	ABRE	CGTACGTGCA	9	825	834
TaGRF2-2B	TraesCS2B02G416300.1	ABRE	GCCGCGTGGC	9	990	999
TaGRF2-2B	TraesCS2B02G416300.1	ABRE	ACGTG	5	1020	1025
TaGRF2-2B	TraesCS2B02G416300.1	ABRE	ACGTG	5	1125	1130
TaGRF2-2B	TraesCS2B02G416300.1	ARE	AAACCA	6	728	734
TaGRF2-2B	TraesCS2B02G416300.1	Box 4	ATTAAT	6	762	768
TaGRF2-2B	TraesCS2B02G416300.1	CAAT-box	CAAAT	5	140	145
TaGRF2-2B	TraesCS2B02G416300.1	CAAT-box	CCAAT	5	759	764
TaGRF2-2B	TraesCS2B02G416300.1	CAT-box	GCCACT	6	632	638
TaGRF2-2B	TraesCS2B02G416300.1	CAT-box	GCCACT	6	718	724
TaGRF2-2B	TraesCS2B02G416300.1	C-box	ACGAGCACCGCC	11	623	634
TaGRF2-2B	TraesCS2B02G416300.1	CGTCA-motif	CGTCA	5	242	247
TaGRF2-2B	TraesCS2B02G416300.1	CGTCA-motif	CGTCA	5	383	388
TaGRF2-2B	TraesCS2B02G416300.1	CGTCA-motif	CGTCA	5	976	981
TaGRF2-2B	TraesCS2B02G416300.1	CGTCA-motif	CGTCA	5	1127	1132
TaGRF2-2B	TraesCS2B02G416300.1	CGTCA-motif	CGTCA	5	1424	1429
TaGRF2-2B	TraesCS2B02G416300.1	Gap-box	CAAATGAA(A/G)A	9.5	140	149.5
TaGRF2-2B	TraesCS2B02G416300.1	G-box	CACGTC	6	582	588
TaGRF2-2B	TraesCS2B02G416300.1	G-box	TACGTG	6	827	833
TaGRF2-2B	TraesCS2B02G416300.1	G-box	CACGTC	6	1020	1026
TaGRF2-2B	TraesCS2B02G416300.1	G-box	CACGTC	6	1125	1131
TaGRF2-2B	TraesCS2B02G416300.1	G-box	CACGAC	6	1308	1314
TaGRF2-2B	TraesCS2B02G416300.1	GC-motif	CCCCCG	6	109	115
TaGRF2-2B	TraesCS2B02G416300.1	GC-motif	CCCCCG	6	434	440
TaGRF2-2B	TraesCS2B02G416300.1	GC-motif	CCCCCG	6	792	798
TaGRF2-2B	TraesCS2B02G416300.1	GC-motif	CCCCCG	6	1213	1219
TaGRF2-2B	TraesCS2B02G416300.1	O2-site	GATGATGTGG	9	526	535
TaGRF2-2B	TraesCS2B02G416300.1	Sp1	GGGCGG	6	100	106
TaGRF2-2B	TraesCS2B02G416300.1	Sp1	GGGCGG	6	404	410
TaGRF2-2B	TraesCS2B02G416300.1	Sp1	GGGCGG	6	852	858
TaGRF2-2B	TraesCS2B02G416300.1	TGACG-motif	TGACG	5	242	247
TaGRF2-2B	TraesCS2B02G416300.1	TGACG-motif	TGACG	5	383	388
TaGRF2-2B	TraesCS2B02G416300.1	TGACG-motif	TGACG	5	976	981
TaGRF2-2B	TraesCS2B02G416300.1	TGACG-motif	TGACG	5	1127	1132
TaGRF2-2B	TraesCS2B02G416300.1	TGACG-motif	TGACG	5	1424	1429
TaGRF2-2B	TraesCS2B02G416300.1	TGA-element	AACGAC	6	53	59
TaGRF2-2B	TraesCS2B02G416300.1	TGA-element	AACGAC	6	1182	1188
TaGRF2-2D	TraesCS2D02G395900.1	A-box	CCGTCC	6	368	374
TaGRF2-2D	TraesCS2D02G395900.1	A-box	CCGTCC	6	822	828
TaGRF2-2D	TraesCS2D02G395900.1	A-box	CCGTCC	6	973	979
TaGRF2-2D	TraesCS2D02G395900.1	ABRE	ACGTG	5	308	313
TaGRF2-2D	TraesCS2D02G395900.1	ABRE	ACGTG	5	551	556
TaGRF2-2D	TraesCS2D02G395900.1	ABRE	CGTACGTGCA	9	549	558
TaGRF2-2D	TraesCS2D02G395900.1	ABRE	GCCGCGTGGC	9	714	723
TaGRF2-2D	TraesCS2D02G395900.1	ABRE	ACGTG	5	849	854
TaGRF2-2D	TraesCS2D02G395900.1	CAAT-box	CCAAT	5	487	492
TaGRF2-2D	TraesCS2D02G395900.1	CAT-box	GCCACT	6	357	363
TaGRF2-2D	TraesCS2D02G395900.1	CAT-box	GCCACT	6	443	449
TaGRF2-2D	TraesCS2D02G395900.1	C-box	ACGAGCACCGCC	11	348	359
TaGRF2-2D	TraesCS2D02G395900.1	CGTCA-motif	CGTCA	5	111	116
TaGRF2-2D	TraesCS2D02G395900.1	CGTCA-motif	CGTCA	5	700	705
TaGRF2-2D	TraesCS2D02G395900.1	CGTCA-motif	CGTCA	5	851	856
TaGRF2-2D	TraesCS2D02G395900.1	GARE-motif	TCTGTTG	7	452	459
TaGRF2-2D	TraesCS2D02G395900.1	G-box	CACGTC	6	307	313
TaGRF2-2D	TraesCS2D02G395900.1	G-box	TACGTG	6	551	557
TaGRF2-2D	TraesCS2D02G395900.1	G-box	CACGTC	6	849	855
TaGRF2-2D	TraesCS2D02G395900.1	G-box	CACGAC	6	1057	1063
TaGRF2-2D	TraesCS2D02G395900.1	GC-motif	CCCCCG	6	159	165
TaGRF2-2D	TraesCS2D02G395900.1	GC-motif	CCCCCG	6	962	968
TaGRF2-2D	TraesCS2D02G395900.1	O2-site	GATGATGTGG	9	251	260
TaGRF2-2D	TraesCS2D02G395900.1	Sp1	GGGCGG	6	129	135
TaGRF2-2D	TraesCS2D02G395900.1	Sp1	GGGCGG	6	576	582
TaGRF2-2D	TraesCS2D02G395900.1	TGACG-motif	TGACG	5	111	116
TaGRF2-2D	TraesCS2D02G395900.1	TGACG-motif	TGACG	5	700	705
TaGRF2-2D	TraesCS2D02G395900.1	TGACG-motif	TGACG	5	851	856
TaGRF3-2A	TraesCS2A02G435100.1	A-box	CCGTCC	6	619	625
TaGRF3-2A	TraesCS2A02G435100.1	A-box	CCGTCC	6	1385	1391
TaGRF3-2A	TraesCS2A02G435100.1	A-box	CCGTCC	6	1425	1431
TaGRF3-2A	TraesCS2A02G435100.1	ABRE	ACGTG	5	699	704
TaGRF3-2A	TraesCS2A02G435100.1	ABRE	CGTACGTGCA	9	696	705
TaGRF3-2A	TraesCS2A02G435100.1	ABRE	ACGTG	5	1482	1487
TaGRF3-2A	TraesCS2A02G435100.1	ABRE	CGTACGTGCA	10	1479	1489
TaGRF3-2A	TraesCS2A02G435100.1	ATCT-motif	AATCTAATCC	9	896	905
TaGRF3-2A	TraesCS2A02G435100.1	CAAT-box	CAAAT	5	769	774
TaGRF3-2A	TraesCS2A02G435100.1	CAAT-box	CCAAT	5	786	791
TaGRF3-2A	TraesCS2A02G435100.1	CAAT-box	CAAAT	5	852	857
TaGRF3-2A	TraesCS2A02G435100.1	CAAT-box	CAAAT	5	872	877
TaGRF3-2A	TraesCS2A02G435100.1	CAAT-box	CAAAT	5	930	935
TaGRF3-2A	TraesCS2A02G435100.1	CAAT-box	CAAAT	5	998	1003
TaGRF3-2A	TraesCS2A02G435100.1	CAAT-box	CAAAT	5	1035	1040
TaGRF3-2A	TraesCS2A02G435100.1	CAAT-box	CCAAT	5	1118	1123
TaGRF3-2A	TraesCS2A02G435100.1	CAAT-box	CCAAT	5	1359	1364
TaGRF3-2A	TraesCS2A02G435100.1	CAAT-box	CAAAT	5	1444	1449
TaGRF3-2A	TraesCS2A02G435100.1	G-box	TACGTG	6	698	704
TaGRF3-2A	TraesCS2A02G435100.1	G-box	TACGTG	6	1481	1487
TaGRF3-2A	TraesCS2A02G435100.1	GC-motif	CCCCCG	6	759	765
TaGRF3-2A	TraesCS2A02G435100.1	Sp1	GGGCGG	6	526	532
TaGRF3-2A	TraesCS2A02G435100.1	TATA-box	TATA	4	253	257
TaGRF3-2A	TraesCS2A02G435100.1	TATA-box	ATATAT	6	252	258
TaGRF3-2A	TraesCS2A02G435100.1	TATA-box	TATA	4	1325	1329
TaGRF3-2B	TraesCS2B02G458400.1	A-box	CCGTCC	6	523	529
TaGRF3-2B	TraesCS2B02G458400.1	A-box	CCGTCC	6	1099	1105
TaGRF3-2B	TraesCS2B02G458400.1	A-box	CCGTCC	6	1264	1270
TaGRF3-2B	TraesCS2B02G458400.1	ARE	AAACCA	6	1387	1393
TaGRF3-2B	TraesCS2B02G458400.1	ARE	AAACCA	6	1443	1449
TaGRF3-2B	TraesCS2B02G458400.1	ATCT-motif	AATCTAATCC	9	796	805
TaGRF3-2B	TraesCS2B02G458400.1	AuxRR-core	GGTCCAT	7	1118	1125
TaGRF3-2B	TraesCS2B02G458400.1	AuxRR-core	GGTCCAT	7	1395	1402
TaGRF3-2B	TraesCS2B02G458400.1	CAAT-box	CAAAT	5	671	676
TaGRF3-2B	TraesCS2B02G458400.1	CAAT-box	CCAAT	5	688	693
TaGRF3-2B	TraesCS2B02G458400.1	CAAT-box	CAAAT	5	752	757
TaGRF3-2B	TraesCS2B02G458400.1	CAAT-box	CAAAT	5	772	777
TaGRF3-2B	TraesCS2B02G458400.1	CAAT-box	CAAAT	5	830	835
TaGRF3-2B	TraesCS2B02G458400.1	CAAT-box	CAAAT	5	895	900
TaGRF3-2B	TraesCS2B02G458400.1	CAAT-box	CAAAT	5	926	931
TaGRF3-2B	TraesCS2B02G458400.1	CAAT-box	CCAAT	5	987	992
TaGRF3-2B	TraesCS2B02G458400.1	CAAT-box	CCAAT	5	1234	1239
TaGRF3-2B	TraesCS2B02G458400.1	CAAT-box	CAAAT	5	1384	1389
TaGRF3-2B	TraesCS2B02G458400.1	GC-motif	CCCCCG	6	1289	1295
TaGRF3-2B	TraesCS2B02G458400.1	HD-Zip 1	CAAT(A/T)ATTG	8	1229	1237
TaGRF3-2B	TraesCS2B02G458400.1	Sp1	GGGCGG	6	433	439
TaGRF3-2B	TraesCS2B02G458400.1	TATA-box	TATA	4	158	162
TaGRF3-2B	TraesCS2B02G458400.1	TATA-box	ATATAT	6	157	163
TaGRF3-2B	TraesCS2B02G458400.1	TATA-box	TATAAA	6	291	297
TaGRF3-2B	TraesCS2B02G458400.1	TATA-box	TATAA	5	292	297
TaGRF3-2B	TraesCS2B02G458400.1	TATA-box	TATA	4	293	297
TaGRF3-2B	TraesCS2B02G458400.1	TCA-element	CCATCTTTTT	9	726	735
TaGRF3-2D	TraesCS2D02G435200.1	A-box	CCGTCC	6	560	566
TaGRF3-2D	TraesCS2D02G435200.1	A-box	CCGTCC	6	1128	1134
TaGRF3-2D	TraesCS2D02G435200.1	ATCT-motif	AATCTAATCC	9	834	843
TaGRF3-2D	TraesCS2D02G435200.1	ATCT-motif	AATCTAATCC	9	967	976
TaGRF3-2D	TraesCS2D02G435200.1	CAAT-box	CAAAT	5	708	713
TaGRF3-2D	TraesCS2D02G435200.1	CAAT-box	CCAAT	5	725	730
TaGRF3-2D	TraesCS2D02G435200.1	CAAT-box	CAAAT	5	790	795
TaGRF3-2D	TraesCS2D02G435200.1	CAAT-box	CAAAT	5	810	815
TaGRF3-2D	TraesCS2D02G435200.1	CAAT-box	CAAAT	5	868	873
TaGRF3-2D	TraesCS2D02G435200.1	CAAT-box	CAAAT	5	935	940
TaGRF3-2D	TraesCS2D02G435200.1	CAAT-box	CAAAT	5	969	974
TaGRF3-2D	TraesCS2D02G435200.1	CAAT-box	CCAAT	5	1052	1057
TaGRF3-2D	TraesCS2D02G435200.1	CAAT-box	CCAAT	5	1271	1276
TaGRF3-2D	TraesCS2D02G435200.1	CAAT-box	CAAAT	5	1409	1414
TaGRF3-2D	TraesCS2D02G435200.1	CAAT-box	CAAAT	5	1414	1419
TaGRF3-2D	TraesCS2D02G435200.1	CAAT-box	CAAAT	5	1455	1460
TaGRF3-2D	TraesCS2D02G435200.1	CGTCA-motif	CGTCA	5	67	72
TaGRF3-2D	TraesCS2D02G435200.1	CGTCA-motif	CGTCA	5	1374	1379
TaGRF3-2D	TraesCS2D02G435200.1	Gap-box	CAAATGAA(A/G)A	9	930	939
TaGRF3-2D	TraesCS2D02G435200.1	GATT-motif	CTCCTGATTGGA	11	1403	1414
TaGRF3-2D	TraesCS2D02G435200.1	GC-motif	CCCCCG	6	1219	1225
TaGRF3-2D	TraesCS2D02G435200.1	MBS	CAACTG	6	1464	1470
TaGRF3-2D	TraesCS2D02G435200.1	Sp1	GGGCGG	6	467	473
TaGRF3-2D	TraesCS2D02G435200.1	Sp1	GGGCGG	6	1282	1288
TaGRF3-2D	TraesCS2D02G435200.1	TATA-box	TATA	4	198	202
TaGRF3-2D	TraesCS2D02G435200.1	TATA-box	ATATAT	6	197	203
TaGRF3-2D	TraesCS2D02G435200.1	TATA-box	TATAAA	6	325	331
TaGRF3-2D	TraesCS2D02G435200.1	TATA-box	taTATAAAg	9	324	333
TaGRF3-2D	TraesCS2D02G435200.1	TATA-box	TATATAA	7	326	333
TaGRF3-2D	TraesCS2D02G435200.1	TATA-box	TATATA	6	327	333
TaGRF3-2D	TraesCS2D02G435200.1	TATA-box	TATA	4	329	333
TaGRF3-2D	TraesCS2D02G435200.1	TATA-box	ATATAT	6	328	334
TaGRF3-2D	TraesCS2D02G435200.1	TC-rich repeats	GTTTTCTTAC	9	1445	1454
TaGRF3-2D	TraesCS2D02G435200.1	TGACG-motif	TGACG	5	67	72
TaGRF3-2D	TraesCS2D02G435200.1	TGACG-motif	TGACG	5	1374	1379
TaGRF4-4A	TraesCS4A02G255000.1	ABRE	CACGTG	6	265	271
TaGRF4-4A	TraesCS4A02G255000.1	ABRE	ACGTG	5	266	271
TaGRF4-4A	TraesCS4A02G255000.1	ABRE	ACGTG	5	788	793
TaGRF4-4A	TraesCS4A02G255000.1	ARE	AAACCA	6	1058	1064
TaGRF4-4A	TraesCS4A02G255000.1	CAAT-box	CAAAT	5	90	95
TaGRF4-4A	TraesCS4A02G255000.1	CAAT-box	CAAAT	5	205	210
TaGRF4-4A	TraesCS4A02G255000.1	CAAT-box	TGCCAAC	7	304	311
TaGRF4-4A	TraesCS4A02G255000.1	CAAT-box	TGCCAAC	7	1299	1306
TaGRF4-4A	TraesCS4A02G255000.1	CAT-box	GCCACT	6	628	634
TaGRF4-4A	TraesCS4A02G255000.1	CGTCA-motif	CGTCA	5	111	116
TaGRF4-4A	TraesCS4A02G255000.1	CGTCA-motif	CGTCA	5	549	554
TaGRF4-4A	TraesCS4A02G255000.1	CGTCA-motif	CGTCA	5	1010	1015
TaGRF4-4A	TraesCS4A02G255000.1	CGTCA-motif	CGTCA	5	1086	1091
TaGRF4-4A	TraesCS4A02G255000.1	GARE-motif	TCTGTTG	7	191	198
TaGRF4-4A	TraesCS4A02G255000.1	GARE-motif	TCTGTTG	7	1328	1335
TaGRF4-4A	TraesCS4A02G255000.1	GARE-motif	TCTGTTG	7	1427	1434
TaGRF4-4A	TraesCS4A02G255000.1	G-Box	CACGTG	6	265	271
TaGRF4-4A	TraesCS4A02G255000.1	G-box	CACGTG	6	265	271
TaGRF4-4A	TraesCS4A02G255000.1	G-box	CACGAC	6	390	396
TaGRF4-4A	TraesCS4A02G255000.1	G-box	CACGTC	6	787	793
TaGRF4-4A	TraesCS4A02G255000.1	I-box	TGATAATGT	9	57	66
TaGRF4-4A	TraesCS4A02G255000.1	MBS	CAACTG	6	1297	1303
TaGRF4-4A	TraesCS4A02G255000.1	O2-site	GATGATGTGG	9	242	251
TaGRF4-4A	TraesCS4A02G255000.1	O2-site	GATGATGTGG	9	1319	1328
TaGRF4-4A	TraesCS4A02G255000.1	Sp1	GGGCGG	6	634	640
TaGRF4-4A	TraesCS4A02G255000.1	TATA-box	TATA	4	1407	1411
TaGRF4-4A	TraesCS4A02G255000.1	TCCC-motif	TCTCCCT	7	955	962
TaGRF4-4A	TraesCS4A02G255000.1	TGACG-motif	TGACG	5	111	116
TaGRF4-4A	TraesCS4A02G255000.1	TGACG-motif	TGACG	5	549	554
TaGRF4-4A	TraesCS4A02G255000.1	TGACG-motif	TGACG	5	1010	1015
TaGRF4-4A	TraesCS4A02G255000.1	TGACG-motif	TGACG	5	1086	1091
TaGRF4-4B	TraesCS4B02G060000.1	A-box	CCGTCC	6	59	65
TaGRF4-4B	TraesCS4B02G060000.1	A-box	CCGTCC	6	77	83
TaGRF4-4B	TraesCS4B02G060000.1	A-box	CCGTCC	6	81	87
TaGRF4-4B	TraesCS4B02G060000.1	A-box	CCGTCC	6	129	135
TaGRF4-4B	TraesCS4B02G060000.1	AE-box	AGAAACTT	8	1047	1055
TaGRF4-4B	TraesCS4B02G060000.1	ARE	AAACCA	6	11	17
TaGRF4-4B	TraesCS4B02G060000.1	ARE	AAACCA	6	20	26
TaGRF4-4B	TraesCS4B02G060000.1	ARE	AAACCA	6	1347	1353
TaGRF4-4B	TraesCS4B02G060000.1	AuxRR-core	GGTCCAT	7	302	309
TaGRF4-4B	TraesCS4B02G060000.1	CAAT-box	CCAAT	5	922	927
TaGRF4-4B	TraesCS4B02G060000.1	CAAT-box	CCAAT	5	1017	1022
TaGRF4-4B	TraesCS4B02G060000.1	CAAT-box	CAAAT	5	1035	1040
TaGRF4-4B	TraesCS4B02G060000.1	CAAT-box	CCAAT	5	1215	1220
TaGRF4-4B	TraesCS4B02G060000.1	CAAT-box	CAAAT	5	1313	1318
TaGRF4-4B	TraesCS4B02G060000.1	CAAT-box	CCAAT	5	1345	1350
TaGRF4-4B	TraesCS4B02G060000.1	CAAT-box	CAAAT	5	1434	1439
TaGRF4-4B	TraesCS4B02G060000.1	CAAT-box	CAAAT	5	1445	1450
TaGRF4-4B	TraesCS4B02G060000.1	CAT-box	GCCACT	6	1057	1063
TaGRF4-4B	TraesCS4B02G060000.1	CCAAT-box	CAACGG	6	226	232
TaGRF4-4B	TraesCS4B02G060000.1	CCAAT-box	CAACGG	6	1096	1102
TaGRF4-4B	TraesCS4B02G060000.1	CGTCA-motif	CGTCA	5	517	522
TaGRF4-4B	TraesCS4B02G060000.1	GC-motif	CCCCCG	6	339	345
TaGRF4-4B	TraesCS4B02G060000.1	O2-site	GATGATGTGG	9	946	955
TaGRF4-4B	TraesCS4B02G060000.1	P-box	CCTTTTG	7	3	10
TaGRF4-4B	TraesCS4B02G060000.1	P-box	CCTTTTG	7	1132	1139
TaGRF4-4B	TraesCS4B02G060000.1	Sp1	GGGCGG	6	73	79
TaGRF4-4B	TraesCS4B02G060000.1	Sp1	GGGCGG	6	310	316
TaGRF4-4B	TraesCS4B02G060000.1	Sp1	GGGCGG	6	346	352
TaGRF4-4B	TraesCS4B02G060000.1	Sp1	GGGCGG	6	449	455
TaGRF4-4B	TraesCS4B02G060000.1	Sp1	GGGCGG	6	602	608
TaGRF4-4B	TraesCS4B02G060000.1	Sp1	GGGCGG	6	1367	1373
TaGRF4-4B	TraesCS4B02G060000.1	TATA-box	ccTATAAAaa	9	1001	1010
TaGRF4-4B	TraesCS4B02G060000.1	TATA-box	ccTATAAAaa	9	1012	1021
TaGRF4-4B	TraesCS4B02G060000.1	TATA-box	TACAAAA	7	1134	1141
TaGRF4-4B	TraesCS4B02G060000.1	TCA-element	TCAGAAGAGG	9	723	732
TaGRF4-4B	TraesCS4B02G060000.1	TCCC-motif	TCTCCCT	7	286	293
TaGRF4-4B	TraesCS4B02G060000.1	TCCC-motif	TCTCCCT	7	292	299
TaGRF4-4B	TraesCS4B02G060000.1	TGACG-motif	TGACG	5	517	522
TaGRF4-4D	TraesCS4D02G059600.1	ABRE	CACGTG	6	1235	1241
TaGRF4-4D	TraesCS4D02G059600.1	ABRE	ACGTG	5	1236	1241
TaGRF4-4D	TraesCS4D02G059600.1	AE-box	AGAAACAA	8	780	788
TaGRF4-4D	TraesCS4D02G059600.1	CAAT-box	CAAAT	5	661	666
TaGRF4-4D	TraesCS4D02G059600.1	CAAT-box	CAAAT	5	785	790
TaGRF4-4D	TraesCS4D02G059600.1	CAAT-box	CCAAT	5	908	913
TaGRF4-4D	TraesCS4D02G059600.1	CAAT-box	CAAAT	5	1260	1265
TaGRF4-4D	TraesCS4D02G059600.1	CAAT-box	CCAAT	5	1292	1297
TaGRF4-4D	TraesCS4D02G059600.1	CAAT-box	CCAAT	5	1461	1466
TaGRF4-4D	TraesCS4D02G059600.1	CGTCA-motif	CGTCA	5	431	436
TaGRF4-4D	TraesCS4D02G059600.1	GATA-motif	AAGATAAGATT	10	816	826
TaGRF4-4D	TraesCS4D02G059600.1	G-Box	CACGTG	6	1235	1241
TaGRF4-4D	TraesCS4D02G059600.1	G-box	CACGTG	6	1235	1241
TaGRF4-4D	TraesCS4D02G059600.1	I-box	AGATAAGG	8	817	825
TaGRF4-4D	TraesCS4D02G059600.1	I-box	AAGATAAGGCT	10	816	826
TaGRF4-4D	TraesCS4D02G059600.1	Sp1	GGGCGG	6	419	425
TaGRF4-4D	TraesCS4D02G059600.1	TATA-box	TATA	4	992	996
TaGRF4-4D	TraesCS4D02G059600.1	TATA-box	TATA	4	1159	1163
TaGRF4-4D	TraesCS4D02G059600.1	TATA-box	ATATAA	6	1158	1164
TaGRF4-4D	TraesCS4D02G059600.1	TATA-box	TATAAATA	8	1277	1285
TaGRF4-4D	TraesCS4D02G059600.1	TATA-box	TATAAAT	7	1278	1285
TaGRF4-4D	TraesCS4D02G059600.1	TATA-box	TATAAA	6	1279	1285
TaGRF4-4D	TraesCS4D02G059600.1	TATA-box	TATAA	5	1280	1285
TaGRF4-4D	TraesCS4D02G059600.1	TATA-box	TATA	4	1281	1285
TaGRF4-4D	TraesCS4D02G059600.1	TATA-box	TATA	4	1321	1325
TaGRF4-4D	TraesCS4D02G059600.1	TATA-box	ATATAT	6	1320	1326
TaGRF4-4D	TraesCS4D02G059600.1	TATA-box	TATAA	5	1380	1385
TaGRF4-4D	TraesCS4D02G059600.1	TATA-box	TATA	4	1381	1385
TaGRF4-4D	TraesCS4D02G059600.1	TATA-box	TATA	4	1389	1393
TaGRF4-4D	TraesCS4D02G059600.1	TCT-motif	TCTTAC	6	1079	1085
TaGRF4-4D	TraesCS4D02G059600.1	TGACG-motif	TGACG	5	431	436
TaGRF5-4A	TraesCS4A02G291500.1	AACA_motif	TAACAAACTCCA	12	338	350
TaGRF5-4A	TraesCS4A02G291500.1	ABRE	CACGTG	6	818	824
TaGRF5-4A	TraesCS4A02G291500.1	ABRE	ACGTG	5	819	824
TaGRF5-4A	TraesCS4A02G291500.1	AE-box	AGAAACAA	8	869	877
TaGRF5-4A	TraesCS4A02G291500.1	ARE	AAACCA	6	681	687
TaGRF5-4A	TraesCS4A02G291500.1	ARE	AAACCA	6	1112	1118
TaGRF5-4A	TraesCS4A02G291500.1	CAAT-box	CAAAT	5	79	84
TaGRF5-4A	TraesCS4A02G291500.1	CAAT-box	CCAAT	5	315	320
TaGRF5-4A	TraesCS4A02G291500.1	CAAT-box	CAAAT	5	636	641
TaGRF5-4A	TraesCS4A02G291500.1	CAAT-box	CCAAT	5	991	996
TaGRF5-4A	TraesCS4A02G291500.1	CAAT-box	CCAAT	5	1258	1263
TaGRF5-4A	TraesCS4A02G291500.1	CGTCA-motif	CGTCA	5	999	1004
TaGRF5-4A	TraesCS4A02G291500.1	GARE-motif	TCTGTTG	7	689	696
TaGRF5-4A	TraesCS4A02G291500.1	G-box	CACGAC	6	574	580
TaGRF5-4A	TraesCS4A02G291500.1	G-Box	CACGTG	6	818	824
TaGRF5-4A	TraesCS4A02G291500.1	G-box	CACGTG	6	818	824
TaGRF5-4A	TraesCS4A02G291500.1	G-box	ACACGTGT	8	817	825
TaGRF5-4A	TraesCS4A02G291500.1	MBS	CAACTG	6	699	705
TaGRF5-4A	TraesCS4A02G291500.1	MBS	CAACTG	6	894	900
TaGRF5-4A	TraesCS4A02G291500.1	O2-site	GATGA(C/T)(A/G)TG(A/G)	8	320	328
TaGRF5-4A	TraesCS4A02G291500.1	TATA-box	TATAA	5	6	11
TaGRF5-4A	TraesCS4A02G291500.1	TATA-box	TATA	4	7	11
TaGRF5-4A	TraesCS4A02G291500.1	TATA-box	TACAAAA	7	117	124
TaGRF5-4A	TraesCS4A02G291500.1	TATA-box	TATA	4	943	947
TaGRF5-4A	TraesCS4A02G291500.1	TATA-box	ATATAA	6	942	948
TaGRF5-4A	TraesCS4A02G291500.1	TATA-box	TATACA	6	963	969
TaGRF5-4A	TraesCS4A02G291500.1	TATA-box	TATA	4	965	969
TaGRF5-4A	TraesCS4A02G291500.1	TATA-box	TATAAAT	7	1328	1335
TaGRF5-4A	TraesCS4A02G291500.1	TATA-box	TATAAA	6	1329	1335
TaGRF5-4A	TraesCS4A02G291500.1	TATA-box	TATAA	5	1330	1335
TaGRF5-4A	TraesCS4A02G291500.1	TATA-box	TATA	4	1331	1335
TaGRF5-4A	TraesCS4A02G291500.1	TATA-box	TATA	4	1367	1371
TaGRF5-4A	TraesCS4A02G291500.1	TATA-box	ATATAA	6	1366	1372
TaGRF5-4A	TraesCS4A02G291500.1	TATA-box	TATAA	5	1396	1401
TaGRF5-4A	TraesCS4A02G291500.1	TATA-box	TATA	4	1397	1401
TaGRF5-4A	TraesCS4A02G291500.1	TC-rich repeats	GTTTTCTTAC	9	1034	1043
TaGRF5-4A	TraesCS4A02G291500.1	TCT-motif	TCTTAC	6	1038	1044
TaGRF5-4A	TraesCS4A02G291500.1	TGACG-motif	TGACG	5	999	1004
TaGRF5-4D	TraesCS4D02G020300.1	3-AF1 binding site	TAAGAGAGGAA	10	191	201
TaGRF5-4D	TraesCS4D02G020300.1	A-box	CCGTCC	6	5	11
TaGRF5-4D	TraesCS4D02G020300.1	A-box	CCGTCC	6	78	84
TaGRF5-4D	TraesCS4D02G020300.1	AE-box	AGAAACTT	8	1174	1182
TaGRF5-4D	TraesCS4D02G020300.1	ARE	AAACCA	6	30	36
TaGRF5-4D	TraesCS4D02G020300.1	ARE	AAACCA	6	39	45
TaGRF5-4D	TraesCS4D02G020300.1	ARE	AAACCA	6	1469	1475
TaGRF5-4D	TraesCS4D02G020300.1	AuxRR-core	GGTCCAT	7	297	304
TaGRF5-4D	TraesCS4D02G020300.1	CAAT-box	CAAAT	5	888	893
TaGRF5-4D	TraesCS4D02G020300.1	CAAT-box	CCAAT	5	1054	1059
TaGRF5-4D	TraesCS4D02G020300.1	CAAT-box	CCAAT	5	1145	1150
TaGRF5-4D	TraesCS4D02G020300.1	CAAT-box	CCAAT	5	1342	1347
TaGRF5-4D	TraesCS4D02G020300.1	CAAT-box	CCAAT	5	1414	1419
TaGRF5-4D	TraesCS4D02G020300.1	CAAT-box	CCAAT	5	1467	1472
TaGRF5-4D	TraesCS4D02G020300.1	CCAAT-box	CAACGG	6	221	227
TaGRF5-4D	TraesCS4D02G020300.1	CCAAT-box	CAACGG	6	1222	1228
TaGRF5-4D	TraesCS4D02G020300.1	CGTCA-motif	CGTCA	5	485	490
TaGRF5-4D	TraesCS4D02G020300.1	GATA-motif	GATAGGA	7	1306	1313
TaGRF5-4D	TraesCS4D02G020300.1	GC-motif	CCCCCG	6	334	340
TaGRF5-4D	TraesCS4D02G020300.1	O2-site	GATGATGTGG	9	1078	1087
TaGRF5-4D	TraesCS4D02G020300.1	P-box	CCTTTTG	7	22	29
TaGRF5-4D	TraesCS4D02G020300.1	P-box	CCTTTTG	7	1258	1265
TaGRF5-4D	TraesCS4D02G020300.1	Sp1	GGGCGG	6	92	98
TaGRF5-4D	TraesCS4D02G020300.1	Sp1	GGGCGG	6	305	311
TaGRF5-4D	TraesCS4D02G020300.1	Sp1	GGGCGG	6	341	347
TaGRF5-4D	TraesCS4D02G020300.1	Sp1	GGGCGG	6	419	425
TaGRF5-4D	TraesCS4D02G020300.1	TATA-box	ccTATAAAaa	9	1129	1138
TaGRF5-4D	TraesCS4D02G020300.1	TATA-box	ccTATAAAaa	9	1140	1149
TaGRF5-4D	TraesCS4D02G020300.1	TATA-box	TACAAAA	7	1260	1267
TaGRF5-4D	TraesCS4D02G020300.1	TCA-element	CCATCTTTTT	10	1024	1034
TaGRF5-4D	TraesCS4D02G020300.1	TCCC-motif	TCTCCCT	7	915	922
TaGRF5-4D	TraesCS4D02G020300.1	TGACG-motif	TGACG	5	485	490
TaGRF6-4A	TraesCS4A02G434900.1	ABRE	ACGTG	5	175	180
TaGRF6-4A	TraesCS4A02G434900.1	ABRE	CACGTG	6	311	317
TaGRF6-4A	TraesCS4A02G434900.1	ABRE	ACGTG	5	312	317
TaGRF6-4A	TraesCS4A02G434900.1	ABRE	CACGTG	6	317	323
TaGRF6-4A	TraesCS4A02G434900.1	ABRE	ACGTG	5	318	323
TaGRF6-4A	TraesCS4A02G434900.1	ARE	AAACCA	6	244	250
TaGRF6-4A	TraesCS4A02G434900.1	ARE	AAACCA	6	1103	1109
TaGRF6-4A	TraesCS4A02G434900.1	Box 4	ATTAAT	6	975	981
TaGRF6-4A	TraesCS4A02G434900.1	Box 4	ATTAAT	6	1489	1495
TaGRF6-4A	TraesCS4A02G434900.1	CAAT-box	CAAAT	5	83	88
TaGRF6-4A	TraesCS4A02G434900.1	CAAT-box	CAAAT	5	386	391
TaGRF6-4A	TraesCS4A02G434900.1	CAAT-box	CAAAT	5	423	428
TaGRF6-4A	TraesCS4A02G434900.1	CAAT-box	CAAAT	5	1270	1275
TaGRF6-4A	TraesCS4A02G434900.1	CAAT-box	CAAAT	5	1339	1344
TaGRF6-4A	TraesCS4A02G434900.1	CAAT-box	CAAAT	5	1394	1399
TaGRF6-4A	TraesCS4A02G434900.1	CAT-box	GCCACT	6	429	435
TaGRF6-4A	TraesCS4A02G434900.1	CAT-box	GCCACT	6	557	563
TaGRF6-4A	TraesCS4A02G434900.1	CCAAT-box	CAACGG	6	508	514
TaGRF6-4A	TraesCS4A02G434900.1	CCAAT-box	CAACGG	6	830	836
TaGRF6-4A	TraesCS4A02G434900.1	CGTCA-motif	CGTCA	5	349	354
TaGRF6-4A	TraesCS4A02G434900.1	GARE-motif	TCTGTTG	7	365	372
TaGRF6-4A	TraesCS4A02G434900.1	G-Box	CACGTT	6	174	180
TaGRF6-4A	TraesCS4A02G434900.1	G-box	GCCACGTGGA	9	172	181
TaGRF6-4A	TraesCS4A02G434900.1	G-box	CACGAC	6	219	225
TaGRF6-4A	TraesCS4A02G434900.1	G-Box	CACGTG	6	311	317
TaGRF6-4A	TraesCS4A02G434900.1	G-box	CACGTG	6	311	317
TaGRF6-4A	TraesCS4A02G434900.1	G-Box	CACGTG	6	317	323
TaGRF6-4A	TraesCS4A02G434900.1	G-box	CACGTG	6	317	323
TaGRF6-4A	TraesCS4A02G434900.1	GC-motif	CCCCCG	6	792	798
TaGRF6-4A	TraesCS4A02G434900.1	LAMP-element	CTTTATCA	8	1069	1077
TaGRF6-4A	TraesCS4A02G434900.1	MBS	CAACTG	6	783	789
TaGRF6-4A	TraesCS4A02G434900.1	MBS	CAACTG	6	1356	1362
TaGRF6-4A	TraesCS4A02G434900.1	MSA-like	(T/C)C(T/C)AACGG(T/C)(T/C)A	8.5	827	835.5
TaGRF6-4A	TraesCS4A02G434900.1	O2-site	GATGATGTGG	9	1370	1379
TaGRF6-4A	TraesCS4A02G434900.1	TATA-box	TATAAA	6	1106	1112
TaGRF6-4A	TraesCS4A02G434900.1	TATA-box	TATAA	5	1107	1112
TaGRF6-4A	TraesCS4A02G434900.1	TATA-box	TATA	4	1108	1112
TaGRF6-4A	TraesCS4A02G434900.1	TATA-box	TATA	4	1293	1297
TaGRF6-4A	TraesCS4A02G434900.1	TATA-box	ccTATAAAaa	9	1291	1300
TaGRF6-4A	TraesCS4A02G434900.1	TATA-box	TATA	4	1322	1326
TaGRF6-4A	TraesCS4A02G434900.1	TATA-box	TACAAAA	7	1403	1410
TaGRF6-4A	TraesCS4A02G434900.1	TATA-box	TATA	4	1448	1452
TaGRF6-4A	TraesCS4A02G434900.1	TATA-box	TATAAAT	7	1482	1489
TaGRF6-4A	TraesCS4A02G434900.1	TATA-box	TATAAA	6	1483	1489
TaGRF6-4A	TraesCS4A02G434900.1	TATA-box	TATAA	5	1484	1489
TaGRF6-4A	TraesCS4A02G434900.1	TATA-box	TATA	4	1485	1489
TaGRF6-4A	TraesCS4A02G434900.1	TCA-element	CCATCTTTTT	10	1406	1416
TaGRF6-4A	TraesCS4A02G434900.1	TGACG-motif	TGACG	5	349	354
TaGRF6-4A	TraesCS4A02G434900.1	TGA-element	AACGAC	6	127	133
TaGRF7-6A	TraesCS6A02G174800.1	ABRE	AACCCGG	7	702	709
TaGRF7-6A	TraesCS6A02G174800.1	ABRE	ACGTG	5	922	927
TaGRF7-6A	TraesCS6A02G174800.1	ABRE	CGTACGTGCA	9	920	929
TaGRF7-6A	TraesCS6A02G174800.1	ABRE	CACGTG	6	1061	1067
TaGRF7-6A	TraesCS6A02G174800.1	ABRE	ACGTG	5	1062	1067
TaGRF7-6A	TraesCS6A02G174800.1	CAAT-box	TGCCAAC	7	474	481
TaGRF7-6A	TraesCS6A02G174800.1	CAAT-box	CAAAT	5	712	717
TaGRF7-6A	TraesCS6A02G174800.1	CAT-box	GCCACT	6	18	24
TaGRF7-6A	TraesCS6A02G174800.1	CAT-box	GCCACT	6	516	522
TaGRF7-6A	TraesCS6A02G174800.1	CCAAT-box	CAACGG	6	120	126
TaGRF7-6A	TraesCS6A02G174800.1	CGTCA-motif	CGTCA	5	127	132
TaGRF7-6A	TraesCS6A02G174800.1	CGTCA-motif	CGTCA	5	285	290
TaGRF7-6A	TraesCS6A02G174800.1	G-box	CACGAC	6	444	450
TaGRF7-6A	TraesCS6A02G174800.1	G-box	TACGTG	6	922	928
TaGRF7-6A	TraesCS6A02G174800.1	G-Box	CACGTG	6	1061	1067
TaGRF7-6A	TraesCS6A02G174800.1	G-box	CACGTG	6	1061	1067
TaGRF7-6A	TraesCS6A02G174800.1	GC-motif	CCCCCG	6	62	68
TaGRF7-6A	TraesCS6A02G174800.1	GC-motif	CCCCCG	6	815	821
TaGRF7-6A	TraesCS6A02G174800.1	GTGGC-motif	GATTCTGTGGC	10	18	28
TaGRF7-6A	TraesCS6A02G174800.1	GTGGC-motif	GATTCTGTGGC	10	140	150
TaGRF7-6A	TraesCS6A02G174800.1	GTGGC-motif	CAGCGTGTGGC	10	963	973
TaGRF7-6A	TraesCS6A02G174800.1	O2-site	GATGATGTGG	9	140	149
TaGRF7-6A	TraesCS6A02G174800.1	RY-element	CATGCATG	8	866	874
TaGRF7-6A	TraesCS6A02G174800.1	Sp1	GGGCGG	6	351	357
TaGRF7-6A	TraesCS6A02G174800.1	TCA-element	TCAGAAGAGG	9	715	724
TaGRF7-6A	TraesCS6A02G174800.1	TGACG-motif	TGACG	5	127	132
TaGRF7-6A	TraesCS6A02G174800.1	TGACG-motif	TGACG	5	285	290
TaGRF8-6A	TraesCS6A02G257600.1	A-box	CCGTCC	6	98	104
TaGRF8-6A	TraesCS6A02G257600.1	A-box	CCGTCC	6	655	661
TaGRF8-6A	TraesCS6A02G257600.1	A-box	CCGTCC	6	897	903
TaGRF8-6A	TraesCS6A02G257600.1	A-box	CCGTCC	6	912	918
TaGRF8-6A	TraesCS6A02G257600.1	A-box	CCGTCC	6	916	922
TaGRF8-6A	TraesCS6A02G257600.1	ABRE	ACGTG	5	143	148
TaGRF8-6A	TraesCS6A02G257600.1	ABRE	CGTACGTGCA	9	140	149
TaGRF8-6A	TraesCS6A02G257600.1	ABRE	ACGTG	5	684	689
TaGRF8-6A	TraesCS6A02G257600.1	ABRE	ACGTG	5	716	721
TaGRF8-6A	TraesCS6A02G257600.1	ARE	AAACCA	6	31	37
TaGRF8-6A	TraesCS6A02G257600.1	CAAT-box	CCAAT	5	584	589
TaGRF8-6A	TraesCS6A02G257600.1	CAT-box	GCCACT	6	666	672
TaGRF8-6A	TraesCS6A02G257600.1	CCAAT-box	CAACGG	6	557	563
TaGRF8-6A	TraesCS6A02G257600.1	CGTCA-motif	CGTCA	5	244	249
TaGRF8-6A	TraesCS6A02G257600.1	CGTCA-motif	CGTCA	5	355	360
TaGRF8-6A	TraesCS6A02G257600.1	CGTCA-motif	CGTCA	5	921	926
TaGRF8-6A	TraesCS6A02G257600.1	G-box	TACGTG	6	142	148
TaGRF8-6A	TraesCS6A02G257600.1	G-box	CACGTC	6	683	689
TaGRF8-6A	TraesCS6A02G257600.1	G-box	CACGTC	6	716	722
TaGRF8-6A	TraesCS6A02G257600.1	G-box	CACGAC	6	984	990
TaGRF8-6A	TraesCS6A02G257600.1	GC-motif	CCCCCG	6	415	421
TaGRF8-6A	TraesCS6A02G257600.1	GC-motif	CCCCCG	6	825	831
TaGRF8-6A	TraesCS6A02G257600.1	Sp1	GGGCGG	6	238	244
TaGRF8-6A	TraesCS6A02G257600.1	Sp1	GGGCGG	6	334	340
TaGRF8-6A	TraesCS6A02G257600.1	Sp1	GGGCGG	6	638	644
TaGRF8-6A	TraesCS6A02G257600.1	Sp1	GGGCGG	6	798	804
TaGRF8-6A	TraesCS6A02G257600.1	Sp1	GGGCGG	6	803	809
TaGRF8-6A	TraesCS6A02G257600.1	Sp1	GGGCGG	6	884	890
TaGRF8-6A	TraesCS6A02G257600.1	Sp1	GGGCGG	6	1002	1008
TaGRF8-6A	TraesCS6A02G257600.1	TATA-box	TATA	4	1018	1022
TaGRF8-6A	TraesCS6A02G257600.1	TCCC-motif	TCTCCCT	7	12	19
TaGRF8-6A	TraesCS6A02G257600.1	TCT-motif	TCTTAC	6	167	173
TaGRF8-6A	TraesCS6A02G257600.1	TGACG-motif	TGACG	5	244	249
TaGRF8-6A	TraesCS6A02G257600.1	TGACG-motif	TGACG	5	355	360
TaGRF8-6A	TraesCS6A02G257600.1	TGACG-motif	TGACG	5	921	926
TaGRF8-6B	TraesCS6B02G267500.1	A-box	CCGTCC	6	159	165
TaGRF8-6B	TraesCS6B02G267500.1	A-box	CCGTCC	6	401	407
TaGRF8-6B	TraesCS6B02G267500.1	A-box	CCGTCC	6	963	969
TaGRF8-6B	TraesCS6B02G267500.1	ABRE	ACGTG	5	341	346
TaGRF8-6B	TraesCS6B02G267500.1	ABRE	ACGTG	5	373	378
TaGRF8-6B	TraesCS6B02G267500.1	ABRE	ACGTG	5	919	924
TaGRF8-6B	TraesCS6B02G267500.1	ABRE	CGTACGTGCA	9	917	926
TaGRF8-6B	TraesCS6B02G267500.1	ARE	AAACCA	6	1030	1036
TaGRF8-6B	TraesCS6B02G267500.1	CAAT-box	CCAAT	5	473	478
TaGRF8-6B	TraesCS6B02G267500.1	CAT-box	GCCACT	6	390	396
TaGRF8-6B	TraesCS6B02G267500.1	CGTCA-motif	CGTCA	5	701	706
TaGRF8-6B	TraesCS6B02G267500.1	CGTCA-motif	CGTCA	5	821	826
TaGRF8-6B	TraesCS6B02G267500.1	G-box	CACGTC	6	340	346
TaGRF8-6B	TraesCS6B02G267500.1	G-box	CACGTC	6	373	379
TaGRF8-6B	TraesCS6B02G267500.1	G-box	TACGTG	6	919	925
TaGRF8-6B	TraesCS6B02G267500.1	GC-motif	CCCCCG	6	231	237
TaGRF8-6B	TraesCS6B02G267500.1	Sp1	GGGCGG	6	253	259
TaGRF8-6B	TraesCS6B02G267500.1	Sp1	GGGCGG	6	418	424
TaGRF8-6B	TraesCS6B02G267500.1	Sp1	GGGCGG	6	826	832
TaGRF8-6B	TraesCS6B02G267500.1	TATA-box	TATAAA	6	52	58
TaGRF8-6B	TraesCS6B02G267500.1	TATA-box	TATAA	5	53	58
TaGRF8-6B	TraesCS6B02G267500.1	TATA-box	TATA	4	54	58
TaGRF8-6B	TraesCS6B02G267500.1	TCCC-motif	TCTCCCT	7	1048	1055
TaGRF8-6B	TraesCS6B02G267500.1	TCT-motif	TCTTAC	6	894	900
TaGRF8-6B	TraesCS6B02G267500.1	TGACG-motif	TGACG	5	701	706
TaGRF8-6B	TraesCS6B02G267500.1	TGACG-motif	TGACG	5	821	826
TaGRF8-6D	TraesCS6D02G238900.1	A-box	CCGTCC	6	107	113
TaGRF8-6D	TraesCS6D02G238900.1	A-box	CCGTCC	6	694	700
TaGRF8-6D	TraesCS6D02G238900.1	A-box	CCGTCC	6	948	954
TaGRF8-6D	TraesCS6D02G238900.1	A-box	CCGTCC	6	952	958
TaGRF8-6D	TraesCS6D02G238900.1	ABRE	ACGTG	5	152	157
TaGRF8-6D	TraesCS6D02G238900.1	ABRE	CGTACGTGCA	9	149	158
TaGRF8-6D	TraesCS6D02G238900.1	ABRE	ACGTG	5	519	524
TaGRF8-6D	TraesCS6D02G238900.1	ABRE	CGTACGTGCA	9	516	525
TaGRF8-6D	TraesCS6D02G238900.1	ABRE	ACGTG	5	723	728
TaGRF8-6D	TraesCS6D02G238900.1	ABRE	ACGTG	5	755	760
TaGRF8-6D	TraesCS6D02G238900.1	ARE	AAACCA	6	40	46
TaGRF8-6D	TraesCS6D02G238900.1	CAAT-box	CCAAT	5	623	628
TaGRF8-6D	TraesCS6D02G238900.1	CAAT-box	CAAAT	5	980	985
TaGRF8-6D	TraesCS6D02G238900.1	CAT-box	GCCACT	6	705	711
TaGRF8-6D	TraesCS6D02G238900.1	CGTCA-motif	CGTCA	5	250	255
TaGRF8-6D	TraesCS6D02G238900.1	CGTCA-motif	CGTCA	5	370	375
TaGRF8-6D	TraesCS6D02G238900.1	CGTCA-motif	CGTCA	5	603	608
TaGRF8-6D	TraesCS6D02G238900.1	CGTCA-motif	CGTCA	5	957	962
TaGRF8-6D	TraesCS6D02G238900.1	G-box	TACGTG	6	151	157
TaGRF8-6D	TraesCS6D02G238900.1	G-box	TACGTG	6	518	524
TaGRF8-6D	TraesCS6D02G238900.1	G-box	CACGAC	6	525	531
TaGRF8-6D	TraesCS6D02G238900.1	G-box	CACGTC	6	722	728
TaGRF8-6D	TraesCS6D02G238900.1	G-box	CACGTC	6	755	761
TaGRF8-6D	TraesCS6D02G238900.1	G-box	CACGAC	6	1020	1026
TaGRF8-6D	TraesCS6D02G238900.1	GC-motif	CCCCCG	6	430	436
TaGRF8-6D	TraesCS6D02G238900.1	GC-motif	CCCCCG	6	801	807
TaGRF8-6D	TraesCS6D02G238900.1	GC-motif	CCCCCG	6	864	870
TaGRF8-6D	TraesCS6D02G238900.1	Sp1	GGGCGG	6	837	843
TaGRF8-6D	TraesCS6D02G238900.1	Sp1	GGGCGG	6	842	848
TaGRF8-6D	TraesCS6D02G238900.1	TATA-box	TATA	4	1054	1058
TaGRF8-6D	TraesCS6D02G238900.1	TCCC-motif	TCTCCCT	7	21	28
TaGRF8-6D	TraesCS6D02G238900.1	TCT-motif	TCTTAC	6	176	182
TaGRF8-6D	TraesCS6D02G238900.1	TGACG-motif	TGACG	5	250	255
TaGRF8-6D	TraesCS6D02G238900.1	TGACG-motif	TGACG	5	370	375
TaGRF8-6D	TraesCS6D02G238900.1	TGACG-motif	TGACG	5	603	608
TaGRF8-6D	TraesCS6D02G238900.1	TGACG-motif	TGACG	5	957	962
TaGRF9-6A	TraesCS6A02G269600.1	CAAT-box	CAAAT	5	46	51
TaGRF9-6A	TraesCS6A02G269600.1	CAAT-box	CAAAT	5	862	867
TaGRF9-6A	TraesCS6A02G269600.1	CAAT-box	CCAAT	5	886	891
TaGRF9-6A	TraesCS6A02G269600.1	CAAT-box	CAAAT	5	894	899
TaGRF9-6A	TraesCS6A02G269600.1	CAAT-box	CAAAT	5	920	925
TaGRF9-6A	TraesCS6A02G269600.1	CAAT-box	CAAAT	5	1022	1027
TaGRF9-6A	TraesCS6A02G269600.1	CAAT-box	CAAAT	5	1221	1226
TaGRF9-6A	TraesCS6A02G269600.1	CAAT-box	CAAAT	5	1473	1478
TaGRF9-6A	TraesCS6A02G269600.1	CAT-box	GCCACT	6	448	454
TaGRF9-6A	TraesCS6A02G269600.1	CCAAT-box	CAACGG	6	312	318
TaGRF9-6A	TraesCS6A02G269600.1	CCAAT-box	CAACGG	6	1200	1206
TaGRF9-6A	TraesCS6A02G269600.1	CCAAT-box	CAACGG	6	1489	1495
TaGRF9-6A	TraesCS6A02G269600.1	CGTCA-motif	CGTCA	5	271	276
TaGRF9-6A	TraesCS6A02G269600.1	CGTCA-motif	CGTCA	5	353	358
TaGRF9-6A	TraesCS6A02G269600.1	CGTCA-motif	CGTCA	5	565	570
TaGRF9-6A	TraesCS6A02G269600.1	CGTCA-motif	CGTCA	5	927	932
TaGRF9-6A	TraesCS6A02G269600.1	GC-motif	CCCCCG	6	346	352
TaGRF9-6A	TraesCS6A02G269600.1	GCN4_motif	TGAGTCA	7	1046	1053
TaGRF9-6A	TraesCS6A02G269600.1	LTR	CCGAAA	6	787	793
TaGRF9-6A	TraesCS6A02G269600.1	MBS	CAACTG	6	995	1001
TaGRF9-6A	TraesCS6A02G269600.1	RY-element	CATGCATG	8	118	126
TaGRF9-6A	TraesCS6A02G269600.1	Sp1	GGGCGG	6	195	201
TaGRF9-6A	TraesCS6A02G269600.1	TATA-box	TATA	4	88	92
TaGRF9-6A	TraesCS6A02G269600.1	TATA-box	TATA	4	763	767
TaGRF9-6A	TraesCS6A02G269600.1	TATA-box	TATA	4	812	816
TaGRF9-6A	TraesCS6A02G269600.1	TATA-box	ATATAT	6	811	817
TaGRF9-6A	TraesCS6A02G269600.1	TATA-box	TATA	4	820	824
TaGRF9-6A	TraesCS6A02G269600.1	TATA-box	ATATAT	6	819	825
TaGRF9-6A	TraesCS6A02G269600.1	TATA-box	ATATAT	6	1070	1076
TaGRF9-6A	TraesCS6A02G269600.1	TATA-box	TATATA	6	1071	1077
TaGRF9-6A	TraesCS6A02G269600.1	TATA-box	TATA	4	1073	1077
TaGRF9-6A	TraesCS6A02G269600.1	TATA-box	ATATAA	6	1072	1078
TaGRF9-6A	TraesCS6A02G269600.1	TGACG-motif	TGACG	5	271	276
TaGRF9-6A	TraesCS6A02G269600.1	TGACG-motif	TGACG	5	353	358
TaGRF9-6A	TraesCS6A02G269600.1	TGACG-motif	TGACG	5	565	570
TaGRF9-6A	TraesCS6A02G269600.1	TGACG-motif	TGACG	5	927	932
TaGRF9-6A	TraesCS6A02G269600.1	TGA-element	AACGAC	6	654	660
TaGRF9-6B	TraesCS6B02G296900.1	A-box	CCGTCC	6	133	139
TaGRF9-6B	TraesCS6B02G296900.1	ABRE	TACGGTC	7	1048	1055
TaGRF9-6B	TraesCS6B02G296900.1	Box 4	ATTAAT	6	1443	1449
TaGRF9-6B	TraesCS6B02G296900.1	CAAT-box	CAAAT	5	49	54
TaGRF9-6B	TraesCS6B02G296900.1	CAAT-box	CAAAT	5	63	68
TaGRF9-6B	TraesCS6B02G296900.1	CAAT-box	CAAAT	5	1012	1017
TaGRF9-6B	TraesCS6B02G296900.1	CAAT-box	CAAAT	5	1316	1321
TaGRF9-6B	TraesCS6B02G296900.1	CAAT-box	CAAAT	5	1388	1393
TaGRF9-6B	TraesCS6B02G296900.1	CAAT-box	CAAAT	5	1447	1452
TaGRF9-6B	TraesCS6B02G296900.1	CAT-box	GCCACT	6	474	480
TaGRF9-6B	TraesCS6B02G296900.1	CCAAT-box	CAACGG	6	338	344
TaGRF9-6B	TraesCS6B02G296900.1	CGTCA-motif	CGTCA	5	297	302
TaGRF9-6B	TraesCS6B02G296900.1	CGTCA-motif	CGTCA	5	379	384
TaGRF9-6B	TraesCS6B02G296900.1	CGTCA-motif	CGTCA	5	600	605
TaGRF9-6B	TraesCS6B02G296900.1	circadian	CAAAGATATC	9	973	982
TaGRF9-6B	TraesCS6B02G296900.1	GARE-motif	TCTGTTG	7	1428	1435
TaGRF9-6B	TraesCS6B02G296900.1	G-box	CACGAC	6	58	64
TaGRF9-6B	TraesCS6B02G296900.1	G-box	CACGAC	6	1120	1126
TaGRF9-6B	TraesCS6B02G296900.1	GCN4_motif	TGAGTCA	7	1025	1032
TaGRF9-6B	TraesCS6B02G296900.1	MBS	CAACTG	6	950	956
TaGRF9-6B	TraesCS6B02G296900.1	MBS	CAACTG	6	1397	1403
TaGRF9-6B	TraesCS6B02G296900.1	Sp1	GGGCGG	6	229	235
TaGRF9-6B	TraesCS6B02G296900.1	TATA-box	ATATAT	6	87	93
TaGRF9-6B	TraesCS6B02G296900.1	TATA-box	TATATA	6	88	94
TaGRF9-6B	TraesCS6B02G296900.1	TATA-box	TATA	4	90	94
TaGRF9-6B	TraesCS6B02G296900.1	TATA-box	TATA	4	801	805
TaGRF9-6B	TraesCS6B02G296900.1	TATA-box	TATA	4	850	854
TaGRF9-6B	TraesCS6B02G296900.1	TATA-box	ATATAT	6	849	855
TaGRF9-6B	TraesCS6B02G296900.1	TATA-box	TATA	4	1392	1396
TaGRF9-6B	TraesCS6B02G296900.1	TATA-box	ATATAA	6	1391	1397
TaGRF9-6B	TraesCS6B02G296900.1	TCT-motif	TCTTAC	6	1337	1343
TaGRF9-6B	TraesCS6B02G296900.1	TGACG-motif	TGACG	5	297	302
TaGRF9-6B	TraesCS6B02G296900.1	TGACG-motif	TGACG	5	379	384
TaGRF9-6B	TraesCS6B02G296900.1	TGACG-motif	TGACG	5	600	605
TaGRF9-6B	TraesCS6B02G296900.1	TGA-element	AACGAC	6	692	698
TaGRF9-6D	TraesCS6D02G245300.1	A-box	CCGTCC	6	388	394
TaGRF9-6D	TraesCS6D02G245300.1	A-box	CCGTCC	6	489	495
TaGRF9-6D	TraesCS6D02G245300.1	A-box	CCGTCC	6	1134	1140
TaGRF9-6D	TraesCS6D02G245300.1	ABRE	ACGTG	5	321	326
TaGRF9-6D	TraesCS6D02G245300.1	ABRE	AACCCGG	7	1050	1057
TaGRF9-6D	TraesCS6D02G245300.1	ABRE	ACGTG	5	1386	1391
TaGRF9-6D	TraesCS6D02G245300.1	ARE	AAACCA	6	809	815
TaGRF9-6D	TraesCS6D02G245300.1	Box 4	ATTAAT	6	953	959
TaGRF9-6D	TraesCS6D02G245300.1	CAAT-box	CAAAT	5	609	614
TaGRF9-6D	TraesCS6D02G245300.1	CAAT-box	CAAAT	5	742	747
TaGRF9-6D	TraesCS6D02G245300.1	CAAT-box	CAAAT	5	963	968
TaGRF9-6D	TraesCS6D02G245300.1	CAAT-box	CAAAT	5	1021	1026
TaGRF9-6D	TraesCS6D02G245300.1	CAT-box	GCCACT	6	1145	1151
TaGRF9-6D	TraesCS6D02G245300.1	CAT-box	GCCACT	6	1307	1313
TaGRF9-6D	TraesCS6D02G245300.1	CCAAT-box	CAACGG	6	1341	1347
TaGRF9-6D	TraesCS6D02G245300.1	CCAAT-box	CAACGG	6	1365	1371
TaGRF9-6D	TraesCS6D02G245300.1	CGTCA-motif	CGTCA	5	319	324
TaGRF9-6D	TraesCS6D02G245300.1	circadian	CAAAGATATC	9	1476	1485
TaGRF9-6D	TraesCS6D02G245300.1	G-box	CACGTC	6	320	326
TaGRF9-6D	TraesCS6D02G245300.1	G-Box	CACGTT	6	1386	1392
TaGRF9-6D	TraesCS6D02G245300.1	GC-motif	CCCCCG	6	59	65
TaGRF9-6D	TraesCS6D02G245300.1	GC-motif	CCCCCG	6	1356	1362
TaGRF9-6D	TraesCS6D02G245300.1	MBS	CAACTG	6	946	952
TaGRF9-6D	TraesCS6D02G245300.1	P-box	CCTTTTG	7	932	939
TaGRF9-6D	TraesCS6D02G245300.1	Sp1	GGGCGG	6	540	546
TaGRF9-6D	TraesCS6D02G245300.1	Sp1	GGGCGG	6	1282	1288
TaGRF9-6D	TraesCS6D02G245300.1	TATA-box	TATA	4	462	466
TaGRF9-6D	TraesCS6D02G245300.1	TATA-box	TATAAA	6	812	818
TaGRF9-6D	TraesCS6D02G245300.1	TATA-box	TATAA	5	813	818
TaGRF9-6D	TraesCS6D02G245300.1	TATA-box	TATA	4	814	818
TaGRF9-6D	TraesCS6D02G245300.1	TCA-element	CCATCTTTTT	9	144	153
TaGRF9-6D	TraesCS6D02G245300.1	TCCC-motif	TCTCCCT	7	124	131
TaGRF9-6D	TraesCS6D02G245300.1	TCCC-motif	TCTCCCT	7	1441	1448
TaGRF9-6D	TraesCS6D02G245300.1	TGACG-motif	TGACG	5	319	324
TaGRF9-6D	TraesCS6D02G245300.1	TGA-element	AACGAC	6	15	21
TaGRF10-6A	TraesCS6A02G335900.1	3-AF1 binding site	TAAGAGAGGAA	10	526	536
TaGRF10-6A	TraesCS6A02G335900.1	A-box	CCGTCC	6	1082	1088
TaGRF10-6A	TraesCS6A02G335900.1	A-box	CCGTCC	6	1253	1259
TaGRF10-6A	TraesCS6A02G335900.1	A-box	CCGTCC	6	1461	1467
TaGRF10-6A	TraesCS6A02G335900.1	A-box	CCGTCC	6	1465	1471
TaGRF10-6A	TraesCS6A02G335900.1	ABRE	ACGTG	5	389	394
TaGRF10-6A	TraesCS6A02G335900.1	ABRE	CGTACGTGCA	9	386	395
TaGRF10-6A	TraesCS6A02G335900.1	ABRE	ACGTG	5	862	867
TaGRF10-6A	TraesCS6A02G335900.1	ABRE	GCCGCGTGGC	9	1140	1149
TaGRF10-6A	TraesCS6A02G335900.1	ABRE	GCCGCGTGGC	9	1236	1245
TaGRF10-6A	TraesCS6A02G335900.1	ARE	AAACCA	6	206	212
TaGRF10-6A	TraesCS6A02G335900.1	ARE	AAACCA	6	510	516
TaGRF10-6A	TraesCS6A02G335900.1	AuxRR-core	GGTCCAT	7	1063	1070
TaGRF10-6A	TraesCS6A02G335900.1	Box III	atCATTTTCACt	11	242	253
TaGRF10-6A	TraesCS6A02G335900.1	CAAT-box	CAAAT	5	219	224
TaGRF10-6A	TraesCS6A02G335900.1	CAAT-box	CCAAT	5	371	376
TaGRF10-6A	TraesCS6A02G335900.1	CAAT-box	CCAAT	5	587	592
TaGRF10-6A	TraesCS6A02G335900.1	CAT-box	GCCACT	6	664	670
TaGRF10-6A	TraesCS6A02G335900.1	CAT-box	GCCACT	6	910	916
TaGRF10-6A	TraesCS6A02G335900.1	CAT-box	GCCACT	6	1450	1456
TaGRF10-6A	TraesCS6A02G335900.1	CCAAT-box	CAACGG	6	918	924
TaGRF10-6A	TraesCS6A02G335900.1	CGTCA-motif	CGTCA	5	979	984
TaGRF10-6A	TraesCS6A02G335900.1	CGTCA-motif	CGTCA	5	1027	1032
TaGRF10-6A	TraesCS6A02G335900.1	CGTCA-motif	CGTCA	5	1288	1293
TaGRF10-6A	TraesCS6A02G335900.1	GATA-motif	AAGGATAAGG	9	225	234
TaGRF10-6A	TraesCS6A02G335900.1	G-box	CACGAC	6	181	187
TaGRF10-6A	TraesCS6A02G335900.1	G-box	TACGTG	6	388	394
TaGRF10-6A	TraesCS6A02G335900.1	G-box	CACGAC	6	633	639
TaGRF10-6A	TraesCS6A02G335900.1	G-box	CACGTC	6	861	867
TaGRF10-6A	TraesCS6A02G335900.1	G-box	CACGAC	6	1218	1224
TaGRF10-6A	TraesCS6A02G335900.1	G-box	CACGAC	6	1223	1229
TaGRF10-6A	TraesCS6A02G335900.1	GC-motif	CCCCCG	6	1343	1349
TaGRF10-6A	TraesCS6A02G335900.1	RY-element	CATGCATG	8	302	310
TaGRF10-6A	TraesCS6A02G335900.1	Sp1	GGGCGG	6	1478	1484
TaGRF10-6A	TraesCS6A02G335900.1	TCA-element	CCATCTTTTT	9	246	255
TaGRF10-6A	TraesCS6A02G335900.1	TCT-motif	TCTTAC	6	525	531
TaGRF10-6A	TraesCS6A02G335900.1	TGACG-motif	TGACG	5	979	984
TaGRF10-6A	TraesCS6A02G335900.1	TGACG-motif	TGACG	5	1027	1032
TaGRF10-6A	TraesCS6A02G335900.1	TGACG-motif	TGACG	5	1288	1293
TaGRF10-6B	TraesCS6B02G366700.1	A-box	CCGTCC	6	1130	1136
TaGRF10-6B	TraesCS6B02G366700.1	A-box	CCGTCC	6	1301	1307
TaGRF10-6B	TraesCS6B02G366700.1	ABRE	ACGTG	5	433	438
TaGRF10-6B	TraesCS6B02G366700.1	ABRE	CGTACGTGCA	9	430	439
TaGRF10-6B	TraesCS6B02G366700.1	ABRE	CGTACGTGCA	9	582	591
TaGRF10-6B	TraesCS6B02G366700.1	ABRE	ACGTG	5	916	921
TaGRF10-6B	TraesCS6B02G366700.1	ABRE	GCCGCGTGGC	9	1284	1293
TaGRF10-6B	TraesCS6B02G366700.1	ARE	AAACCA	6	44	50
TaGRF10-6B	TraesCS6B02G366700.1	ATCT-motif	AATCTAATCC	9	158	167
TaGRF10-6B	TraesCS6B02G366700.1	AuxRR-core	GGTCCAT	7	1111	1118
TaGRF10-6B	TraesCS6B02G366700.1	Box III	atCATTTTCACt	11	281	292
TaGRF10-6B	TraesCS6B02G366700.1	CAAT-box	CAAAT	5	258	263
TaGRF10-6B	TraesCS6B02G366700.1	CAAT-box	CCAAT	5	415	420
TaGRF10-6B	TraesCS6B02G366700.1	CAAT-box	CAACCAACTCC	10	625	635
TaGRF10-6B	TraesCS6B02G366700.1	CAT-box	GCCACT	6	709	715
TaGRF10-6B	TraesCS6B02G366700.1	CAT-box	GCCACT	6	964	970
TaGRF10-6B	TraesCS6B02G366700.1	CCAAT-box	CAACGG	6	972	978
TaGRF10-6B	TraesCS6B02G366700.1	CGTCA-motif	CGTCA	5	1027	1032
TaGRF10-6B	TraesCS6B02G366700.1	CGTCA-motif	CGTCA	5	1075	1080
TaGRF10-6B	TraesCS6B02G366700.1	CGTCA-motif	CGTCA	5	1336	1341
TaGRF10-6B	TraesCS6B02G366700.1	GATA-motif	AAGGATAAGG	9	264	273
TaGRF10-6B	TraesCS6B02G366700.1	G-box	TACGTG	6	432	438
TaGRF10-6B	TraesCS6B02G366700.1	G-box	CACGAC	6	678	684
TaGRF10-6B	TraesCS6B02G366700.1	G-box	CACGTC	6	915	921
TaGRF10-6B	TraesCS6B02G366700.1	G-box	CACGAC	6	1266	1272
TaGRF10-6B	TraesCS6B02G366700.1	G-box	CACGAC	6	1271	1277
TaGRF10-6B	TraesCS6B02G366700.1	GC-motif	CCCCCG	6	1309	1315
TaGRF10-6B	TraesCS6B02G366700.1	GC-motif	CCCCCG	6	1391	1397
TaGRF10-6B	TraesCS6B02G366700.1	RY-element	CATGCATG	8	345	353
TaGRF10-6B	TraesCS6B02G366700.1	Sp1	GGGCGG	6	3	9
TaGRF10-6B	TraesCS6B02G366700.1	TCA-element	CCATCTTTTT	9	285	294
TaGRF10-6B	TraesCS6B02G366700.1	TGACG-motif	TGACG	5	1027	1032
TaGRF10-6B	TraesCS6B02G366700.1	TGACG-motif	TGACG	5	1075	1080
TaGRF10-6B	TraesCS6B02G366700.1	TGACG-motif	TGACG	5	1336	1341
TaGRF10-6D	TraesCS6D02G315700.1	3-AF1 binding site	TAAGAGAGGAA	10	499	509
TaGRF10-6D	TraesCS6D02G315700.1	A-box	CCGTCC	6	1070	1076
TaGRF10-6D	TraesCS6D02G315700.1	A-box	CCGTCC	6	1241	1247
TaGRF10-6D	TraesCS6D02G315700.1	A-box	CCGTCC	6	1449	1455
TaGRF10-6D	TraesCS6D02G315700.1	A-box	CCGTCC	6	1453	1459
TaGRF10-6D	TraesCS6D02G315700.1	ABRE	ACGTG	5	362	367
TaGRF10-6D	TraesCS6D02G315700.1	ABRE	CGTACGTGCA	9	359	368
TaGRF10-6D	TraesCS6D02G315700.1	ABRE	GCCGCGTGGC	9	1224	1233
TaGRF10-6D	TraesCS6D02G315700.1	ATCT-motif	AATCTAATCC	9	81	90
TaGRF10-6D	TraesCS6D02G315700.1	AuxRR-core	GGTCCAT	7	1051	1058
TaGRF10-6D	TraesCS6D02G315700.1	Box III	atCATTTTCACt	11	204	215
TaGRF10-6D	TraesCS6D02G315700.1	CAAT-box	CAAAT	5	181	186
TaGRF10-6D	TraesCS6D02G315700.1	CAAT-box	CCAAT	5	344	349
TaGRF10-6D	TraesCS6D02G315700.1	CAAT-box	CAACCAACTCC	10	553	563
TaGRF10-6D	TraesCS6D02G315700.1	CAT-box	GCCACT	6	130	136
TaGRF10-6D	TraesCS6D02G315700.1	CAT-box	GCCACT	6	637	643
TaGRF10-6D	TraesCS6D02G315700.1	CAT-box	GCCACT	6	892	898
TaGRF10-6D	TraesCS6D02G315700.1	CAT-box	GCCACT	6	1438	1444
TaGRF10-6D	TraesCS6D02G315700.1	CCAAT-box	CAACGG	6	900	906
TaGRF10-6D	TraesCS6D02G315700.1	CGTCA-motif	CGTCA	5	967	972
TaGRF10-6D	TraesCS6D02G315700.1	CGTCA-motif	CGTCA	5	1015	1020
TaGRF10-6D	TraesCS6D02G315700.1	CGTCA-motif	CGTCA	5	1276	1281
TaGRF10-6D	TraesCS6D02G315700.1	GATA-motif	AAGGATAAGG	9	187	196
TaGRF10-6D	TraesCS6D02G315700.1	G-box	TACGTG	6	361	367
TaGRF10-6D	TraesCS6D02G315700.1	G-box	CACGAC	6	606	612
TaGRF10-6D	TraesCS6D02G315700.1	G-box	CACGAC	6	1206	1212
TaGRF10-6D	TraesCS6D02G315700.1	G-box	CACGAC	6	1211	1217
TaGRF10-6D	TraesCS6D02G315700.1	GC-motif	CCCCCG	6	1249	1255
TaGRF10-6D	TraesCS6D02G315700.1	GC-motif	CCCCCG	6	1331	1337
TaGRF10-6D	TraesCS6D02G315700.1	RY-element	CATGCATG	8	264	272
TaGRF10-6D	TraesCS6D02G315700.1	Sp1	GGGCGG	6	1466	1472
TaGRF10-6D	TraesCS6D02G315700.1	TCA-element	CCATCTTTTT	9	208	217
TaGRF10-6D	TraesCS6D02G315700.1	TCT-motif	TCTTAC	6	498	504
TaGRF10-6D	TraesCS6D02G315700.1	TGACG-motif	TGACG	5	967	972
TaGRF10-6D	TraesCS6D02G315700.1	TGACG-motif	TGACG	5	1015	1020
TaGRF10-6D	TraesCS6D02G315700.1	TGACG-motif	TGACG	5	1276	1281
TaGRF11-7A	TraesCS7A02G049100.1	A-box	CCGTCC	6	590	596
TaGRF11-7A	TraesCS7A02G049100.1	A-box	CCGTCC	6	594	600
TaGRF11-7A	TraesCS7A02G049100.1	A-box	CCGTCC	6	874	880
TaGRF11-7A	TraesCS7A02G049100.1	CAAT-box	CCAAT	5	1386	1391
TaGRF11-7A	TraesCS7A02G049100.1	CAG-motif	GAAAGGCAGAC	10	442	452
TaGRF11-7A	TraesCS7A02G049100.1	CAT-box	GCCACT	6	219	225
TaGRF11-7A	TraesCS7A02G049100.1	CAT-box	GCCACT	6	605	611
TaGRF11-7A	TraesCS7A02G049100.1	CAT-box	GCCACT	6	1082	1088
TaGRF11-7A	TraesCS7A02G049100.1	CCAAT-box	CAACGG	6	1212	1218
TaGRF11-7A	TraesCS7A02G049100.1	CGTCA-motif	CGTCA	5	1408	1413
TaGRF11-7A	TraesCS7A02G049100.1	G-box	CACGAC	6	58	64
TaGRF11-7A	TraesCS7A02G049100.1	G-box	CACGAC	6	1167	1173
TaGRF11-7A	TraesCS7A02G049100.1	GC-motif	CCCCCG	6	536	542
TaGRF11-7A	TraesCS7A02G049100.1	GC-motif	CCCCCG	6	868	874
TaGRF11-7A	TraesCS7A02G049100.1	GC-motif	CCCCCG	6	909	915
TaGRF11-7A	TraesCS7A02G049100.1	RY-element	CATGCATG	8	482	490
TaGRF11-7A	TraesCS7A02G049100.1	Sp1	GGGCGG	6	342	348
TaGRF11-7A	TraesCS7A02G049100.1	Sp1	GGGCGG	6	533	539
TaGRF11-7A	TraesCS7A02G049100.1	Sp1	GGGCGG	6	577	583
TaGRF11-7A	TraesCS7A02G049100.1	TATA-box	TATATA	6	389	395
TaGRF11-7A	TraesCS7A02G049100.1	TATA-box	TATA	4	391	395
TaGRF11-7A	TraesCS7A02G049100.1	TATA-box	ATATAT	6	390	396
TaGRF11-7A	TraesCS7A02G049100.1	TGACG-motif	TGACG	5	1408	1413
TaGRF11-7A	TraesCS7A02G049100.1	TGA-element	AACGAC	6	423	429
TaGRF11-7D	TraesCS7D02G044200.1	A-box	CCGTCC	6	275	281
TaGRF11-7D	TraesCS7D02G044200.1	A-box	CCGTCC	6	514	520
TaGRF11-7D	TraesCS7D02G044200.1	A-box	CCGTCC	6	518	524
TaGRF11-7D	TraesCS7D02G044200.1	A-box	CCGTCC	6	816	822
TaGRF11-7D	TraesCS7D02G044200.1	ABRE	ACGTG	5	1454	1459
TaGRF11-7D	TraesCS7D02G044200.1	ARE	AAACCA	6	1391	1397
TaGRF11-7D	TraesCS7D02G044200.1	CAAT-box	CAAAT	5	1464	1469
TaGRF11-7D	TraesCS7D02G044200.1	CAT-box	GCCACT	6	152	158
TaGRF11-7D	TraesCS7D02G044200.1	CAT-box	GCCACT	6	529	535
TaGRF11-7D	TraesCS7D02G044200.1	CAT-box	GCCACT	6	1024	1030
TaGRF11-7D	TraesCS7D02G044200.1	CCAAT-box	CAACGG	6	1166	1172
TaGRF11-7D	TraesCS7D02G044200.1	CGTCA-motif	CGTCA	5	1346	1351
TaGRF11-7D	TraesCS7D02G044200.1	G-box	CACGAC	6	732	738
TaGRF11-7D	TraesCS7D02G044200.1	G-box	CACGAC	6	1109	1115
TaGRF11-7D	TraesCS7D02G044200.1	G-Box	CACGTT	6	1453	1459
TaGRF11-7D	TraesCS7D02G044200.1	GC-motif	CCCCCG	6	460	466
TaGRF11-7D	TraesCS7D02G044200.1	GC-motif	CCCCCG	6	810	816
TaGRF11-7D	TraesCS7D02G044200.1	GC-motif	CCCCCG	6	851	857
TaGRF11-7D	TraesCS7D02G044200.1	RY-element	CATGCATG	8	406	414
TaGRF11-7D	TraesCS7D02G044200.1	Sp1	GGGCGG	6	457	463
TaGRF11-7D	TraesCS7D02G044200.1	Sp1	GGGCGG	6	501	507
TaGRF11-7D	TraesCS7D02G044200.1	Sp1	GGGCGG	6	670	676
TaGRF11-7D	TraesCS7D02G044200.1	TATA-box	TATATA	6	322	328
TaGRF11-7D	TraesCS7D02G044200.1	TATA-box	TATA	4	324	328
TaGRF11-7D	TraesCS7D02G044200.1	TATA-box	ATATAT	6	323	329
TaGRF11-7D	TraesCS7D02G044200.1	TGACG-motif	TGACG	5	1346	1351
TaGRF12-7A	TraesCS7A02G165600.1	ABRE	ACGTG	5	551	556
TaGRF12-7A	TraesCS7A02G165600.1	ARE	AAACCA	6	754	760
TaGRF12-7A	TraesCS7A02G165600.1	Box 4	ATTAAT	6	1157	1163
TaGRF12-7A	TraesCS7A02G165600.1	Box 4	ATTAAT	6	1401	1407
TaGRF12-7A	TraesCS7A02G165600.1	CAAT-box	CAAAT	5	71	76
TaGRF12-7A	TraesCS7A02G165600.1	CAAT-box	CAAAT	5	83	88
TaGRF12-7A	TraesCS7A02G165600.1	CAAT-box	CCAAT	5	120	125
TaGRF12-7A	TraesCS7A02G165600.1	CAAT-box	CAAAT	5	858	863
TaGRF12-7A	TraesCS7A02G165600.1	CAAT-box	CAAAT	5	928	933
TaGRF12-7A	TraesCS7A02G165600.1	CAAT-box	CCAAT	5	978	983
TaGRF12-7A	TraesCS7A02G165600.1	CAAT-box	CAAAT	5	1008	1013
TaGRF12-7A	TraesCS7A02G165600.1	CAAT-box	CAAAT	5	1063	1068
TaGRF12-7A	TraesCS7A02G165600.1	CAT-box	GCCACT	6	211	217
TaGRF12-7A	TraesCS7A02G165600.1	CCAAT-box	CAACGG	6	162	168
TaGRF12-7A	TraesCS7A02G165600.1	CCAAT-box	CAACGG	6	481	487
TaGRF12-7A	TraesCS7A02G165600.1	CGTCA-motif	CGTCA	5	553	558
TaGRF12-7A	TraesCS7A02G165600.1	GATA-motif	AAGGATAAGG	9	626	635
TaGRF12-7A	TraesCS7A02G165600.1	G-box	CACGTC	6	551	557
TaGRF12-7A	TraesCS7A02G165600.1	GC-motif	CCCCCG	6	443	449
TaGRF12-7A	TraesCS7A02G165600.1	I-box	gGATAAGGTG	9	628	637
TaGRF12-7A	TraesCS7A02G165600.1	MBS	CAACTG	6	434	440
TaGRF12-7A	TraesCS7A02G165600.1	MBS	CAACTG	6	1025	1031
TaGRF12-7A	TraesCS7A02G165600.1	MSA-like	(T/C)C(T/C)AACGG(T/C)(T/C)A	8.5	478	486.5
TaGRF12-7A	TraesCS7A02G165600.1	P-box	CCTTTTG	7	1327	1334
TaGRF12-7A	TraesCS7A02G165600.1	TATA-box	TATA	4	595	599
TaGRF12-7A	TraesCS7A02G165600.1	TATA-box	TATAAA	6	757	763
TaGRF12-7A	TraesCS7A02G165600.1	TATA-box	TATAA	5	758	763
TaGRF12-7A	TraesCS7A02G165600.1	TATA-box	TATA	4	759	763
TaGRF12-7A	TraesCS7A02G165600.1	TATA-box	TATA	4	959	963
TaGRF12-7A	TraesCS7A02G165600.1	TATA-box	ATTATA	6	990	996
TaGRF12-7A	TraesCS7A02G165600.1	TATA-box	TATAA	5	991	996
TaGRF12-7A	TraesCS7A02G165600.1	TATA-box	TATA	4	992	996
TaGRF12-7A	TraesCS7A02G165600.1	TATA-box	TATA	4	1116	1120
TaGRF12-7A	TraesCS7A02G165600.1	TATA-box	TATAAAT	7	1150	1157
TaGRF12-7A	TraesCS7A02G165600.1	TATA-box	TATAAA	6	1151	1157
TaGRF12-7A	TraesCS7A02G165600.1	TATA-box	TATAA	5	1152	1157
TaGRF12-7A	TraesCS7A02G165600.1	TATA-box	TATA	4	1153	1157
TaGRF12-7A	TraesCS7A02G165600.1	TATA-box	TACAAAA	7	1228	1235
TaGRF12-7A	TraesCS7A02G165600.1	TATA-box	TATA	4	1243	1247
TaGRF12-7A	TraesCS7A02G165600.1	TATA-box	TACAAAA	7	1325	1332
TaGRF12-7A	TraesCS7A02G165600.1	TCT-motif	TCTTAC	6	1211	1217
TaGRF12-7A	TraesCS7A02G165600.1	TGACG-motif	TGACG	5	553	558
TaGRF12-7B	TraesCS7B02G070200.1	A-box	CCGTCC	6	523	529
TaGRF12-7B	TraesCS7B02G070200.1	A-box	CCGTCC	6	527	533
TaGRF12-7B	TraesCS7B02G070200.1	A-box	CCGTCC	6	822	828
TaGRF12-7B	TraesCS7B02G070200.1	ABRE	CGTACGTGCA	9	437	446
TaGRF12-7B	TraesCS7B02G070200.1	ARE	AAACCA	6	1381	1387
TaGRF12-7B	TraesCS7B02G070200.1	CAAT-box	CCAAT	5	630	635
TaGRF12-7B	TraesCS7B02G070200.1	CAG-motif	GAAAGGCAGAC	10	365	375
TaGRF12-7B	TraesCS7B02G070200.1	CAT-box	GCCACT	6	150	156
TaGRF12-7B	TraesCS7B02G070200.1	CAT-box	GCCACT	6	1021	1027
TaGRF12-7B	TraesCS7B02G070200.1	CCAAT-box	CAACGG	6	1163	1169
TaGRF12-7B	TraesCS7B02G070200.1	G-box	CACGAC	6	744	750
TaGRF12-7B	TraesCS7B02G070200.1	G-box	CACGAC	6	1106	1112
TaGRF12-7B	TraesCS7B02G070200.1	GC-motif	CCCCCG	6	816	822
TaGRF12-7B	TraesCS7B02G070200.1	GC-motif	CCCCCG	6	857	863
TaGRF12-7B	TraesCS7B02G070200.1	motif I	gGTACGTGGCG	10	665	675
TaGRF12-7B	TraesCS7B02G070200.1	RY-element	CATGCATG	8	402	410
TaGRF12-7B	TraesCS7B02G070200.1	Sp1	GGGCGG	6	270	276
TaGRF12-7B	TraesCS7B02G070200.1	Sp1	GGGCGG	6	466	472
TaGRF12-7B	TraesCS7B02G070200.1	Sp1	GGGCGG	6	510	516
TaGRF12-7B	TraesCS7B02G070200.1	Sp1	GGGCGG	6	682	688
TaGRF12-7B	TraesCS7B02G070200.1	TATA-box	TATATA	6	317	323
TaGRF12-7B	TraesCS7B02G070200.1	TATA-box	TATA	4	319	323
TaGRF12-7B	TraesCS7B02G070200.1	TATA-box	ATATAT	6	318	324
TaGRF12-7D	TraesCS7D02G166400.1	ABRE	ACGTG	5	1390	1395
TaGRF12-7D	TraesCS7D02G166400.1	ARE	AAACCA	6	738	744
TaGRF12-7D	TraesCS7D02G166400.1	Box 4	ATTAAT	6	1131	1137
TaGRF12-7D	TraesCS7D02G166400.1	Box 4	ATTAAT	6	1366	1372
TaGRF12-7D	TraesCS7D02G166400.1	CAAT-box	CAAAT	5	36	41
TaGRF12-7D	TraesCS7D02G166400.1	CAAT-box	CCAAT	5	101	106
TaGRF12-7D	TraesCS7D02G166400.1	CAAT-box	CAAAT	5	834	839
TaGRF12-7D	TraesCS7D02G166400.1	CAAT-box	CAAAT	5	904	909
TaGRF12-7D	TraesCS7D02G166400.1	CAAT-box	CAAAT	5	981	986
TaGRF12-7D	TraesCS7D02G166400.1	CAAT-box	CAAAT	5	1036	1041
TaGRF12-7D	TraesCS7D02G166400.1	CAT-box	GCCACT	6	192	198
TaGRF12-7D	TraesCS7D02G166400.1	CCAAT-box	CAACGG	6	143	149
TaGRF12-7D	TraesCS7D02G166400.1	CCAAT-box	CAACGG	6	462	468
TaGRF12-7D	TraesCS7D02G166400.1	GARE-motif	TCTGTTG	7	15	22
TaGRF12-7D	TraesCS7D02G166400.1	GATA-motif	AAGGATAAGG	9	605	614
TaGRF12-7D	TraesCS7D02G166400.1	G-Box	CACGTT	6	1389	1395
TaGRF12-7D	TraesCS7D02G166400.1	GC-motif	CCCCCG	6	281	287
TaGRF12-7D	TraesCS7D02G166400.1	I-box	gGATAAGGTG	9	607	616
TaGRF12-7D	TraesCS7D02G166400.1	LTR	CCGAAA	6	284	290
TaGRF12-7D	TraesCS7D02G166400.1	MBS	CAACTG	6	415	421
TaGRF12-7D	TraesCS7D02G166400.1	MBS	CAACTG	6	998	1004
TaGRF12-7D	TraesCS7D02G166400.1	MSA-like	(T/C)C(T/C)AACGG(T/C)(T/C)A	8.5	459	467.5
TaGRF12-7D	TraesCS7D02G166400.1	Sp1	GGGCGG	6	278	284
TaGRF12-7D	TraesCS7D02G166400.1	Sp1	GGGCGG	6	380	386
TaGRF12-7D	TraesCS7D02G166400.1	TATA-box	TATAAA	6	741	747
TaGRF12-7D	TraesCS7D02G166400.1	TATA-box	TATAA	5	742	747
TaGRF12-7D	TraesCS7D02G166400.1	TATA-box	TATA	4	743	747
TaGRF12-7D	TraesCS7D02G166400.1	TATA-box	TATA	4	814	818
TaGRF12-7D	TraesCS7D02G166400.1	TATA-box	TATA	4	860	864
TaGRF12-7D	TraesCS7D02G166400.1	TATA-box	ATATAA	6	859	865
TaGRF12-7D	TraesCS7D02G166400.1	TATA-box	TATA	4	936	940
TaGRF12-7D	TraesCS7D02G166400.1	TATA-box	TATA	4	978	982
TaGRF12-7D	TraesCS7D02G166400.1	TATA-box	TATA	4	1217	1221
TaGRF12-7D	TraesCS7D02G166400.1	TATA-box	TACAAAA	7	1291	1298
TaGRF12-7D	TraesCS7D02G166400.1	TCT-motif	TCTTAC	6	1185	1191
