# Supplementary material for: Genome-wide analysis of growth-regulating factors (GRFs) in Triticum aestivum
Source: PeerJ. 2021 Jan 19;9:e10701. doi: 10.7717/peerj.10701 (PMC7821759; doi:10.7717/peerj.10701)
Supplement: Table S6 [file peerj-09-10701-s006.xlsx]

## Sheet: Sheet1
Table S6. GO annotation of TaGRFs.
Gene name	#GeneID	COG_class	COG_class_annotation	GO_annotation	KEGG_annotation	KOG_class	KOG_class_annotation	Pfam_annotation	Swissprot_annotation	TrEMBL_annotation	eggNOG_class	eggNOG_class_annotation	nr_annotation
TaGRF1-2A	TraesCS2A02G238700	--	--	Molecular Function: ATP binding (GO:0005524);; Cellular Component: nucleus (GO:0005634);; Biological Process: regulation of transcription, DNA-templated (GO:0006355);; Molecular Function: hydrolase activity, acting on acid anhydrides, in phosphorus-containing anhydrides (GO:0016818);;	--	--	--	WRC;; QLQ	Growth-regulating factor 11 OS=Oryza sativa subsp. japonica (Rice) PE=2 SV=1	Uncharacterized protein {ECO:0000313|EMBL:EMT30439.1} OS=Aegilops tauschii (Tausch's goatgrass) PE=4 SV=1	K	Transcription	hypothetical protein F775_29935 [Aegilops tauschii]
TaGRF1-2B	TraesCS2B02G256600	--	--	Molecular Function: ATP binding (GO:0005524);; Cellular Component: nucleus (GO:0005634);; Biological Process: regulation of transcription, DNA-templated (GO:0006355);; Molecular Function: hydrolase activity, acting on acid anhydrides, in phosphorus-containing anhydrides (GO:0016818);;	--	--	--	WRC;; QLQ	Growth-regulating factor 11 OS=Oryza sativa subsp. japonica (Rice) PE=2 SV=1	Uncharacterized protein {ECO:0000313|EnsemblPlants:Traes_2BS_E3CBE0B73.1} OS=Triticum aestivum (Wheat) PE=4 SV=1	K	Transcription	PREDICTED: growth-regulating factor 11-like [Brachypodium distachyon]
TaGRF1-2D	TraesCS2D02G246600	--	--	Molecular Function: ATP binding (GO:0005524);; Cellular Component: nucleus (GO:0005634);; Biological Process: regulation of transcription, DNA-templated (GO:0006355);; Molecular Function: hydrolase activity, acting on acid anhydrides, in phosphorus-containing anhydrides (GO:0016818);;	--	--	--	WRC;; QLQ	Growth-regulating factor 11 OS=Oryza sativa subsp. japonica (Rice) PE=2 SV=1	Uncharacterized protein {ECO:0000313|EnsemblPlants:Traes_2DL_243DA9D84.2} OS=Triticum aestivum (Wheat) PE=4 SV=1	K	Transcription	PREDICTED: growth-regulating factor 11-like [Brachypodium distachyon]
TaGRF2-2A	TraesCS2A02G398300	--	--	Molecular Function: ATP binding (GO:0005524);; Cellular Component: nucleus (GO:0005634);; Biological Process: regulation of transcription, DNA-templated (GO:0006355);; Molecular Function: hydrolase activity, acting on acid anhydrides, in phosphorus-containing anhydrides (GO:0016818);;	--	--	--	WRC;; QLQ	Growth-regulating factor 12 OS=Oryza sativa subsp. japonica (Rice) PE=2 SV=1	Uncharacterized protein {ECO:0000313|EnsemblPlants:Traes_2BL_DE9A7327E.1} OS=Triticum aestivum (Wheat) PE=4 SV=1	K	Transcription	PREDICTED: growth-regulating factor isoform X1 [Zea mays]
TaGRF2-2B	TraesCS2B02G416300	--	--	Biological Process: transcription, DNA-templated (GO:0006351);;	--	--	--	WRC;; QLQ	Growth-regulating factor 12 OS=Oryza sativa subsp. japonica (Rice) PE=2 SV=1	Uncharacterized protein {ECO:0000313|EnsemblPlants:Traes_2BL_DE9A7327E.1} OS=Triticum aestivum (Wheat) PE=4 SV=1	K	Transcription	PREDICTED: growth-regulating factor isoform X1 [Zea mays]
TaGRF2-2D	TraesCS2D02G395900	--	--	Biological Process: transcription, DNA-templated (GO:0006351);;	--	--	--	WRC;; QLQ	Growth-regulating factor 12 OS=Oryza sativa subsp. japonica (Rice) PE=2 SV=1	Uncharacterized protein {ECO:0000313|EnsemblPlants:Traes_2BL_DE9A7327E.1} OS=Triticum aestivum (Wheat) PE=4 SV=1	K	Transcription	PREDICTED: growth-regulating factor isoform X1 [Zea mays]
TaGRF3-2A	TraesCS2A02G435100	--	--	Molecular Function: ATP binding (GO:0005524);; Cellular Component: nucleus (GO:0005634);; Biological Process: regulation of transcription, DNA-templated (GO:0006355);; Cellular Component: plastid (GO:0009536);; Molecular Function: hydrolase activity, acting on acid anhydrides, in phosphorus-containing anhydrides (GO:0016818);;	--	--	--	WRC;; QLQ	Growth-regulating factor 3 OS=Oryza sativa subsp. japonica (Rice) PE=3 SV=2	Growth-regulating factor 1 {ECO:0000313|EMBL:ADO21120.1} OS=Hordeum vulgare (Barley) PE=4 SV=1	K	Transcription	growth-regulating factor 1 [Hordeum vulgare]
TaGRF3-2B	TraesCS2B02G458400	--	--	Molecular Function: ATP binding (GO:0005524);; Cellular Component: nucleus (GO:0005634);; Biological Process: regulation of transcription, DNA-templated (GO:0006355);; Cellular Component: plastid (GO:0009536);; Molecular Function: hydrolase activity, acting on acid anhydrides, in phosphorus-containing anhydrides (GO:0016818);;	--	--	--	WRC;; QLQ	Growth-regulating factor 4 OS=Oryza sativa subsp. japonica (Rice) PE=2 SV=1	Growth-regulating factor 1 {ECO:0000313|EMBL:ADO21120.1} OS=Hordeum vulgare (Barley) PE=4 SV=1	K	Transcription	growth-regulating factor 1 [Hordeum vulgare]
TaGRF3-2D	TraesCS2D02G435200	--	--	Molecular Function: ATP binding (GO:0005524);; Cellular Component: nucleus (GO:0005634);; Biological Process: regulation of transcription, DNA-templated (GO:0006355);; Cellular Component: plastid (GO:0009536);; Molecular Function: hydrolase activity, acting on acid anhydrides, in phosphorus-containing anhydrides (GO:0016818);;	--	--	--	WRC;; QLQ	Growth-regulating factor 3 OS=Oryza sativa subsp. japonica (Rice) PE=3 SV=2	Growth-regulating factor 1 {ECO:0000313|EMBL:ADO21120.1} OS=Hordeum vulgare (Barley) PE=4 SV=1	K	Transcription	growth-regulating factor 1 [Hordeum vulgare]
TaGRF4-4A	TraesCS4A02G255000	--	--	Molecular Function: ATP binding (GO:0005524);; Cellular Component: nucleus (GO:0005634);; Biological Process: regulation of transcription, DNA-templated (GO:0006355);; Cellular Component: plastid (GO:0009536);; Molecular Function: hydrolase activity, acting on acid anhydrides, in phosphorus-containing anhydrides (GO:0016818);;	--	--	--	WRC;; QLQ	Growth-regulating factor 6 OS=Oryza sativa subsp. japonica (Rice) PE=2 SV=2	Uncharacterized protein {ECO:0000313|EnsemblPlants:Traes_4AL_4954CD38D.1} OS=Triticum aestivum (Wheat) PE=4 SV=1	K	Transcription	predicted protein [Hordeum vulgare subsp. vulgare]
TaGRF4-4B	TraesCS4B02G060000	--	--	Molecular Function: ATP binding (GO:0005524);; Cellular Component: nucleus (GO:0005634);; Biological Process: regulation of transcription, DNA-templated (GO:0006355);; Cellular Component: plastid (GO:0009536);; Molecular Function: hydrolase activity, acting on acid anhydrides, in phosphorus-containing anhydrides (GO:0016818);;	--	--	--	WRC;; QLQ	Growth-regulating factor 6 OS=Oryza sativa subsp. japonica (Rice) PE=2 SV=2	Uncharacterized protein {ECO:0000313|EnsemblPlants:Traes_4DS_0FB3F3EE9.1} OS=Triticum aestivum (Wheat) PE=4 SV=1	K	Transcription	predicted protein [Hordeum vulgare subsp. vulgare]
TaGRF4-4D	TraesCS4D02G059600	--	--	Molecular Function: ATP binding (GO:0005524);; Cellular Component: nucleus (GO:0005634);; Biological Process: regulation of transcription, DNA-templated (GO:0006355);; Cellular Component: plastid (GO:0009536);; Molecular Function: hydrolase activity, acting on acid anhydrides, in phosphorus-containing anhydrides (GO:0016818);;	--	--	--	WRC;; QLQ	Growth-regulating factor 6 OS=Oryza sativa subsp. japonica (Rice) PE=2 SV=2	Uncharacterized protein {ECO:0000313|EnsemblPlants:Traes_4DS_0FB3F3EE9.1} OS=Triticum aestivum (Wheat) PE=4 SV=1	K	Transcription	predicted protein [Hordeum vulgare subsp. vulgare]
TaGRF5-4A	TraesCS4A02G291500	--	--	Molecular Function: ATP binding (GO:0005524);; Cellular Component: nucleus (GO:0005634);; Biological Process: regulation of transcription, DNA-templated (GO:0006355);; Molecular Function: hydrolase activity, acting on acid anhydrides, in phosphorus-containing anhydrides (GO:0016818);;	--	--	--	WRC;; QLQ	Growth-regulating factor 9 OS=Oryza sativa subsp. japonica (Rice) PE=2 SV=1	Uncharacterized protein {ECO:0000313|EMBL:EMS63909.1, ECO:0000313|EnsemblPlants:TRIUR3_34986-P1} OS=Triticum urartu (Red wild einkorn) PE=4 SV=1	K	Transcription	hypothetical protein TRIUR3_34986 [Triticum urartu]
TaGRF5-4D	TraesCS4D02G020300	--	--	Molecular Function: ATP binding (GO:0005524);; Cellular Component: nucleus (GO:0005634);; Biological Process: regulation of transcription, DNA-templated (GO:0006355);; Molecular Function: hydrolase activity, acting on acid anhydrides, in phosphorus-containing anhydrides (GO:0016818);;	--	--	--	WRC;; QLQ	Growth-regulating factor 9 OS=Oryza sativa subsp. japonica (Rice) PE=2 SV=1	Uncharacterized protein {ECO:0000313|EnsemblPlants:Traes_4DS_261E93270.11} OS=Triticum aestivum (Wheat) PE=4 SV=1	K	Transcription	hypothetical protein TRIUR3_34986 [Triticum urartu]
TaGRF6-4A	TraesCS4A02G434900	--	--	Molecular Function: ATP binding (GO:0005524);; Cellular Component: nucleus (GO:0005634);; Biological Process: regulation of transcription, DNA-templated (GO:0006355);; Molecular Function: hydrolase activity, acting on acid anhydrides, in phosphorus-containing anhydrides (GO:0016818);;	--	--	--	WRC;; QLQ	Growth-regulating factor 5 GN=OSJNBa0019F11.24 OS=Oryza sativa subsp. japonica (Rice) PE=2 SV=1	Uncharacterized protein {ECO:0000313|EMBL:EMS62126.1, ECO:0000313|EnsemblPlants:TRIUR3_01357-P1} OS=Triticum urartu (Red wild einkorn) PE=4 SV=1	K	Transcription	hypothetical protein TRIUR3_01357 [Triticum urartu]
TaGRF7-6A	TraesCS6A02G174800	--	--	Cellular Component: vacuole (GO:0005773);; Biological Process: response to hormone (GO:0009725);; Biological Process: post-embryonic development (GO:0009791);; Cellular Component: membrane (GO:0016020);; Biological Process: response to lipid (GO:0033993);; Biological Process: leaf development (GO:0048366);; Biological Process: regulation of cellular process (GO:0050794);; Biological Process: resp…	--	--	--	WRC;; QLQ	Growth-regulating factor 2 GN=GRF2 OS=Arabidopsis thaliana (Mouse-ear cress) PE=1 SV=1	Uncharacterized protein {ECO:0000313|EMBL:EMS67499.1, ECO:0000313|EnsemblPlants:TRIUR3_33546-P1} OS=Triticum urartu (Red wild einkorn) PE=4 SV=1	K	Transcription	hypothetical protein TRIUR3_33546 [Triticum urartu]
TaGRF8-6A	TraesCS6A02G257600	--	--	Molecular Function: ATP binding (GO:0005524);; Cellular Component: nucleus (GO:0005634);; Biological Process: regulation of transcription, DNA-templated (GO:0006355);; Molecular Function: hydrolase activity, acting on acid anhydrides, in phosphorus-containing anhydrides (GO:0016818);;	--	--	--	WRC;; QLQ	Growth-regulating factor 10 OS=Oryza sativa subsp. japonica (Rice) PE=2 SV=1	Uncharacterized protein {ECO:0000313|EnsemblPlants:MLOC_80060.1} OS=Hordeum vulgare var. distichum (Domesticated barley) PE=4 SV=1	K	Transcription	PREDICTED: growth-regulating factor 10-like [Brachypodium distachyon]
TaGRF8-6B	TraesCS6B02G267500	--	--	Molecular Function: ATP binding (GO:0005524);; Cellular Component: nucleus (GO:0005634);; Biological Process: regulation of transcription, DNA-templated (GO:0006355);; Molecular Function: hydrolase activity, acting on acid anhydrides, in phosphorus-containing anhydrides (GO:0016818);;	--	--	--	WRC;; QLQ	Growth-regulating factor 10 OS=Oryza sativa subsp. japonica (Rice) PE=2 SV=1	Uncharacterized protein {ECO:0000313|EnsemblPlants:MLOC_80060.1} OS=Hordeum vulgare var. distichum (Domesticated barley) PE=4 SV=1	K	Transcription	PREDICTED: growth-regulating factor 10-like [Brachypodium distachyon]
TaGRF8-6D	TraesCS6D02G238900	--	--	Molecular Function: ATP binding (GO:0005524);; Cellular Component: nucleus (GO:0005634);; Biological Process: regulation of transcription, DNA-templated (GO:0006355);; Molecular Function: hydrolase activity, acting on acid anhydrides, in phosphorus-containing anhydrides (GO:0016818);;	--	--	--	WRC;; QLQ	Growth-regulating factor 10 OS=Oryza sativa subsp. japonica (Rice) PE=2 SV=1	Uncharacterized protein {ECO:0000313|EnsemblPlants:MLOC_80060.1} OS=Hordeum vulgare var. distichum (Domesticated barley) PE=4 SV=1	K	Transcription	PREDICTED: growth-regulating factor 10-like [Brachypodium distachyon]
TaGRF9-6A	TraesCS6A02G269600	--	--	Molecular Function: binding (GO:0005488);; Biological Process: transcription, DNA-templated (GO:0006351);; Cellular Component: plastid (GO:0009536);;	--	--	--	WRC;; QLQ	Growth-regulating factor 4 OS=Oryza sativa subsp. japonica (Rice) PE=2 SV=1	Uncharacterized protein {ECO:0000313|EMBL:EMT06854.1} OS=Aegilops tauschii (Tausch's goatgrass) PE=4 SV=1	K	Transcription	hypothetical protein F775_52301 [Aegilops tauschii]
TaGRF9-6B	TraesCS6B02G296900	--	--	Molecular Function: binding (GO:0005488);; Biological Process: transcription, DNA-templated (GO:0006351);; Cellular Component: plastid (GO:0009536);;	--	--	--	WRC;; QLQ	Growth-regulating factor 4 OS=Oryza sativa subsp. japonica (Rice) PE=2 SV=1	Uncharacterized protein {ECO:0000313|EMBL:EMT06854.1} OS=Aegilops tauschii (Tausch's goatgrass) PE=4 SV=1	K	Transcription	hypothetical protein F775_52301 [Aegilops tauschii]
TaGRF9-6D	TraesCS6D02G245300	--	--	Molecular Function: binding (GO:0005488);; Biological Process: transcription, DNA-templated (GO:0006351);; Cellular Component: plastid (GO:0009536);;	--	--	--	WRC;; QLQ	Growth-regulating factor 4 OS=Oryza sativa subsp. japonica (Rice) PE=2 SV=1	Uncharacterized protein {ECO:0000313|EMBL:EMT06854.1} OS=Aegilops tauschii (Tausch's goatgrass) PE=4 SV=1	K	Transcription	hypothetical protein F775_52301 [Aegilops tauschii]
TaGRF10-6A	TraesCS6A02G335900	--	--	Molecular Function: ATP binding (GO:0005524);; Cellular Component: nucleus (GO:0005634);; Biological Process: regulation of transcription, DNA-templated (GO:0006355);; Biological Process: response to gibberellin (GO:0009739);; Molecular Function: hydrolase activity, acting on acid anhydrides, in phosphorus-containing anhydrides (GO:0016818);; Biological Process: response to deep water (GO:0030912…	--	--	--	WRC;; QLQ	Growth-regulating factor 1 OS=Oryza sativa subsp. japonica (Rice) PE=3 SV=1	Uncharacterized protein {ECO:0000313|EnsemblPlants:Traes_6DL_4C3F04219.1} OS=Triticum aestivum (Wheat) PE=4 SV=1	K	Transcription	predicted protein [Hordeum vulgare subsp. vulgare]
TaGRF10-6B	TraesCS6B02G366700	--	--	Molecular Function: ATP binding (GO:0005524);; Cellular Component: nucleus (GO:0005634);; Biological Process: regulation of transcription, DNA-templated (GO:0006355);; Biological Process: response to gibberellin (GO:0009739);; Molecular Function: hydrolase activity, acting on acid anhydrides, in phosphorus-containing anhydrides (GO:0016818);; Biological Process: response to deep water (GO:0030912…	--	--	--	WRC;; QLQ	Growth-regulating factor 1 OS=Oryza sativa subsp. japonica (Rice) PE=3 SV=1	Uncharacterized protein {ECO:0000313|EnsemblPlants:Traes_6DL_4C3F04219.1} OS=Triticum aestivum (Wheat) PE=4 SV=1	K	Transcription	predicted protein [Hordeum vulgare subsp. vulgare]
TaGRF10-6D	TraesCS6D02G315700	--	--	Molecular Function: ATP binding (GO:0005524);; Cellular Component: nucleus (GO:0005634);; Biological Process: regulation of transcription, DNA-templated (GO:0006355);; Biological Process: response to gibberellin (GO:0009739);; Molecular Function: hydrolase activity, acting on acid anhydrides, in phosphorus-containing anhydrides (GO:0016818);; Biological Process: response to deep water (GO:0030912…	--	--	--	WRC;; QLQ	Growth-regulating factor 1 OS=Oryza sativa subsp. japonica (Rice) PE=3 SV=1	Uncharacterized protein {ECO:0000313|EnsemblPlants:Traes_6DL_4C3F04219.1} OS=Triticum aestivum (Wheat) PE=4 SV=1	K	Transcription	predicted protein [Hordeum vulgare subsp. vulgare]
TaGRF11-7A	TraesCS7A02G049100	--	--	Molecular Function: ATP binding (GO:0005524);; Cellular Component: nucleus (GO:0005634);; Biological Process: regulation of transcription, DNA-templated (GO:0006355);; Molecular Function: hydrolase activity, acting on acid anhydrides, in phosphorus-containing anhydrides (GO:0016818);;	--	--	--	WRC;; QLQ	Growth-regulating factor 5 GN=OSJNBa0019F11.24 OS=Oryza sativa subsp. japonica (Rice) PE=2 SV=1	Uncharacterized protein {ECO:0000313|EMBL:EMS62126.1, ECO:0000313|EnsemblPlants:TRIUR3_01357-P1} OS=Triticum urartu (Red wild einkorn) PE=4 SV=1	K	Transcription	hypothetical protein TRIUR3_01357 [Triticum urartu]
TaGRF11-7D	TraesCS7D02G044200	--	--	Molecular Function: ATP binding (GO:0005524);; Cellular Component: nucleus (GO:0005634);; Biological Process: regulation of transcription, DNA-templated (GO:0006355);; Molecular Function: hydrolase activity, acting on acid anhydrides, in phosphorus-containing anhydrides (GO:0016818);;	--	--	--	WRC;; QLQ	Growth-regulating factor 5 GN=OSJNBa0019F11.24 OS=Oryza sativa subsp. japonica (Rice) PE=2 SV=1	Predicted protein {ECO:0000313|EMBL:BAK07599.1} OS=Hordeum vulgare var. distichum (Domesticated barley) PE=2 SV=1	K	Transcription	predicted protein [Hordeum vulgare subsp. vulgare]
TaGRF12-7A	TraesCS7A02G165600	--	--	Molecular Function: ATP binding (GO:0005524);; Cellular Component: nucleus (GO:0005634);; Biological Process: regulation of transcription, DNA-templated (GO:0006355);; Biological Process: response to gibberellin (GO:0009739);; Molecular Function: hydrolase activity, acting on acid anhydrides, in phosphorus-containing anhydrides (GO:0016818);; Biological Process: response to deep water (GO:0030912…	--	--	--	WRC;; QLQ	Growth-regulating factor 2 GN=OSJNBb0015B15.12 OS=Oryza sativa subsp. japonica (Rice) PE=3 SV=1	Uncharacterized protein {ECO:0000313|EMBL:EMT01601.1} OS=Aegilops tauschii (Tausch's goatgrass) PE=4 SV=1	K	Transcription	hypothetical protein F775_13620 [Aegilops tauschii]
TaGRF12-7B	TraesCS7B02G070200	--	--	Molecular Function: ATP binding (GO:0005524);; Cellular Component: nucleus (GO:0005634);; Biological Process: regulation of transcription, DNA-templated (GO:0006355);; Biological Process: response to gibberellin (GO:0009739);; Molecular Function: hydrolase activity, acting on acid anhydrides, in phosphorus-containing anhydrides (GO:0016818);; Biological Process: response to deep water (GO:0030912…	--	--	--	WRC;; QLQ	Growth-regulating factor 2 GN=OSJNBb0015B15.12 OS=Oryza sativa subsp. japonica (Rice) PE=3 SV=1	Uncharacterized protein {ECO:0000313|EMBL:EMT01601.1} OS=Aegilops tauschii (Tausch's goatgrass) PE=4 SV=1	K	Transcription	hypothetical protein F775_13620 [Aegilops tauschii]
TaGRF12-7D	TraesCS7D02G166400	--	--	Cellular Component: nucleus (GO:0005634);; Biological Process: response to gibberellin (GO:0009739);; Biological Process: response to deep water (GO:0030912);;	--	--	--	WRC;; QLQ	Growth-regulating factor 2 GN=OSJNBb0015B15.12 OS=Oryza sativa subsp. japonica (Rice) PE=3 SV=1	Uncharacterized protein {ECO:0000313|EMBL:EMT01601.1} OS=Aegilops tauschii (Tausch's goatgrass) PE=4 SV=1	K	Transcription	hypothetical protein F775_13620 [Aegilops tauschii]
