# Supplementary material for: Genome-wide analysis of growth-regulating factors (GRFs) in Triticum aestivum
Source: PeerJ. 2021 Jan 19;9:e10701. doi: 10.7717/peerj.10701 (PMC7821759; doi:10.7717/peerj.10701)
Supplement: Table S7 [file peerj-09-10701-s007.xlsx]

## Sheet: Sheet1
Table S7. The 89 Homologous Pairs in Triticum aestivum, Triticum urartu, Triticum dicoccoides and Aegilops tauschii.
Gene 1		Gene 2
Name	ID	Name	ID
TaGRF1-2B	TraesCS2B02G256600.1	AeGRF1	AET2Gv20538200.2
TaGRF1-2D	TraesCS2D02G246600.1	AeGRF1	AET2Gv20538200.2
TaGRF3-2A	TraesCS2A02G435100.1	AeGRF3	AET2Gv20964200.2
TaGRF3-2B	TraesCS2B02G458400.1	AeGRF3	AET2Gv20964200.2
TaGRF3-2D	TraesCS2D02G435200.1	AeGRF3	AET2Gv20964200.2
TaGRF4-4A	TraesCS4A02G255000.1	AeGRF5	AET4Gv20124900.1
TaGRF4-4B	TraesCS4B02G060000.1	AeGRF5	AET4Gv20124900.1
TaGRF4-4D	TraesCS4D02G059600.1	AeGRF5	AET4Gv20124900.1
TaGRF5-4A	TraesCS4A02G291500.1	AeGRF4	AET4Gv20034000.11
TaGRF5-4D	TraesCS4D02G020300.1	AeGRF4	AET4Gv20034000.11
TaGRF8-6A	TraesCS6A02G257600.1	AeGRF6	AET6Gv20664900.2
TaGRF8-6B	TraesCS6B02G267500.1	AeGRF6	AET6Gv20664900.2
TaGRF8-6D	TraesCS6D02G238900.1	AeGRF6	AET6Gv20664900.2
TaGRF9-6A	TraesCS6A02G269600.1	AeGRF7	AET6Gv20686100.2
TaGRF9-6B	TraesCS6B02G296900.1	AeGRF7	AET6Gv20686100.2
TaGRF9-6D	TraesCS6D02G245300.1	AeGRF7	AET6Gv20686100.2
TaGRF10-6A	TraesCS6A02G335900.1	AeGRF8	AET6Gv20825100.3
TaGRF12-7B	TraesCS7B02G070200.1	AeGRF10	AET7Gv20433900.2
TdGRF12	TRIDC6AG039700.1	AeGRF6	AET6Gv20664900.2
TdGRF13	TRIDC6AG041360.3	AeGRF7	AET6Gv20686100.2
TdGRF14	TRIDC6BG046580.1	AeGRF6	AET6Gv20664900.2
TdGRF15	TRIDC6BG048340.2	AeGRF7	AET6Gv20686100.2
TdGRF18	TRIDC7BG010470.1	AeGRF10	AET7Gv20433900.2
TuGRF1	TuG1812G0200004500.01.T01	AeGRF2	AET2Gv20886700.2
TuGRF2	TuG1812G0200004855.01.T01	AeGRF3	AET2Gv20964200.2
TuGRF3	TuG1812G0200005465.01.T01	AeGRF1	AET2Gv20538200.2
TuGRF4	TuG1812G0600002856.01.T01	AeGRF6	AET6Gv20664900.2
TuGRF5	TuG1812G0600003593.01.T01	AeGRF8	AET6Gv20825100.3
TaGRF1-2D	TraesCS2D02G246600.1	TaGRF1-2B	TraesCS2B02G256600.1
TaGRF2-2D	TraesCS2D02G395900.1	TaGRF2-2B	TraesCS2B02G416300.1
TaGRF3-2B	TraesCS2B02G458400.1	TaGRF3-2A	TraesCS2A02G435100.1
TaGRF3-2D	TraesCS2D02G435200.1	TaGRF3-2A	TraesCS2A02G435100.1
TaGRF3-2D	TraesCS2D02G435200.1	TaGRF3-2B	TraesCS2B02G458400.1
TaGRF4-4B	TraesCS4B02G060000.1	TaGRF4-4A	TraesCS4A02G255000.1
TaGRF4-4D	TraesCS4D02G059600.1	TaGRF4-4A	TraesCS4A02G255000.1
TaGRF4-4D	TraesCS4D02G059600.1	TaGRF4-4B	TraesCS4B02G060000.1
TaGRF5-4D	TraesCS4D02G020300.1	TaGRF5-4A	TraesCS4A02G291500.1
TaGRF8-6B	TraesCS6B02G267500.1	TaGRF8-6A	TraesCS6A02G257600.1
TaGRF8-6D	TraesCS6D02G238900.1	TaGRF8-6A	TraesCS6A02G257600.1
TaGRF8-6D	TraesCS6D02G238900.1	TaGRF8-6B	TraesCS6B02G267500.1
TaGRF9-6D	TraesCS6D02G245300.1	TaGRF9-6A	TraesCS6A02G269600.1
TaGRF9-6D	TraesCS6D02G245300.1	TaGRF9-6B	TraesCS6B02G296900.1
TaGRF10-6B	TraesCS6B02G366700.1	TaGRF10-6A	TraesCS6A02G335900.1
TaGRF10-6D	TraesCS6D02G315700.1	TaGRF10-6A	TraesCS6A02G335900.1
TaGRF11-7A	TraesCS7A02G049100.1	TaGRF6-4A	TraesCS4A02G434900.1
TaGRF11-7D	TraesCS7D02G044200.1	TaGRF11-7A	TraesCS7A02G049100.1
TaGRF11-7D	TraesCS7D02G044200.1	TaGRF6-4A	TraesCS4A02G434900.1
TaGRF12-7B	TraesCS7B02G070200.1	TaGRF12-7A	TraesCS7A02G165600.1
TaGRF12-7D	TraesCS7D02G166400.1	TaGRF12-7B	TraesCS7B02G070200.1
TdGRF2	TRIDC2AG057630.1	TaGRF2-2B	TraesCS2B02G416300.1
TdGRF2	TRIDC2AG057630.1	TaGRF2-2D	TraesCS2D02G395900.1
TdGRF5	TRIDC2BG060470.2	TaGRF2-2A	TraesCS2A02G398300.1
TdGRF5	TRIDC2BG060470.2	TaGRF2-2B	TraesCS2B02G416300.1
TdGRF5	TRIDC2BG060470.2	TaGRF2-2D	TraesCS2D02G395900.1
TdGRF9	TRIDC4AG065110.1	TaGRF11-7A	TraesCS7A02G049100.1
TdGRF11	TRIDC4BG009270.1	TaGRF4-4A	TraesCS4A02G255000.1
TdGRF11	TRIDC4BG009270.1	TaGRF4-4B	TraesCS4B02G060000.1
TdGRF12	TRIDC6AG039700.1	TaGRF8-6A	TraesCS6A02G257600.1
TdGRF12	TRIDC6AG039700.1	TaGRF8-6B	TraesCS6B02G267500.1
TdGRF12	TRIDC6AG039700.1	TaGRF8-6D	TraesCS6D02G238900.1
TdGRF13	TRIDC6AG041360.3	TaGRF9-6D	TraesCS6D02G245300.1
TdGRF14	TRIDC6BG046580.1	TaGRF8-6A	TraesCS6A02G257600.1
TdGRF14	TRIDC6BG046580.1	TaGRF8-6B	TraesCS6B02G267500.1
TdGRF14	TRIDC6BG046580.1	TaGRF8-6D	TraesCS6D02G238900.1
TdGRF15	TRIDC6BG048340.2	TaGRF9-6D	TraesCS6D02G245300.1
TdGRF17	TRIDC7AG020510.2	TaGRF12-7B	TraesCS7B02G070200.1
TdGRF18	TRIDC7BG010470.1	TaGRF12-7A	TraesCS7A02G165600.1
TdGRF18	TRIDC7BG010470.1	TaGRF12-7B	TraesCS7B02G070200.1
TdGRF18	TRIDC7BG010470.1	TaGRF12-7D	TraesCS7D02G166400.1
TuGRF2	TuG1812G0200004855.01.T01	TaGRF3-2A	TraesCS2A02G435100.1
TuGRF2	TuG1812G0200004855.01.T01	TaGRF3-2B	TraesCS2B02G458400.1
TuGRF2	TuG1812G0200004855.01.T01	TaGRF3-2D	TraesCS2D02G435200.1
TuGRF3	TuG1812G0200005465.01.T01	TaGRF1-2B	TraesCS2B02G256600.1
TuGRF3	TuG1812G0200005465.01.T01	TaGRF1-2D	TraesCS2D02G246600.1
TuGRF4	TuG1812G0600002856.01.T01	TaGRF8-6A	TraesCS6A02G257600.1
TuGRF4	TuG1812G0600002856.01.T01	TaGRF8-6B	TraesCS6B02G267500.1
TuGRF4	TuG1812G0600002856.01.T01	TaGRF8-6D	TraesCS6D02G238900.1
TuGRF5	TuG1812G0600003593.01.T01	TaGRF10-6A	TraesCS6A02G335900.1
TuGRF5	TuG1812G0600003593.01.T01	TaGRF10-6B	TraesCS6B02G366700.1
TuGRF5	TuG1812G0600003593.01.T01	TaGRF10-6D	TraesCS6D02G315700.1
TuGRF6	TuG1812G0700001763.01.T01	TaGRF12-7B	TraesCS7B02G070200.1
TdGRF4	TRIDC2BG034590.1	TdGRF1	TRIDC2AG032100.1
TdGRF5	TRIDC2BG060470.2	TdGRF2	TRIDC2AG057630.1
TdGRF11	TRIDC4BG009270.1	TdGRF7	TRIDC4AG039920.3
TdGRF14	TRIDC6BG046580.1	TdGRF12	TRIDC6AG039700.1
TdGRF18	TRIDC7BG010470.1	TdGRF17	TRIDC7AG020510.2
TuGRF4	TuG1812G0600002856.01.T01	TdGRF12	TRIDC6AG039700.1
TuGRF4	TuG1812G0600002856.01.T01	TdGRF14	TRIDC6BG046580.1
TuGRF6	TuG1812G0700001763.01.T01	TdGRF18	TRIDC7BG010470.1
