# Supplementary material for: Genome-wide analysis of growth-regulating factors (GRFs) in Triticum aestivum
Source: PeerJ. 2021 Jan 19;9:e10701. doi: 10.7717/peerj.10701 (PMC7821759; doi:10.7717/peerj.10701)
Supplement: Table S8 [file peerj-09-10701-s008.xlsx]

## Sheet: Sheet1
Table S8. The Transcriptome data of TaGRF genes in different tissues and environment.
	27 C_leaf_7d_Chinese Spring	12 C_leaf_7d_Chinese Spring	none_leaf_9 days_Gemmiza 10	PEG 6000 2 hours_leaf_9 days_Gemmiza 10	PEG 6000 12 hours_leaf_9 days_Gemmiza 10	none_leaf_9 days_Giza 168	PEG 6000 2 hours_leaf_9 days_Giza 168	PEG 6000 12 hours_leaf_9 days_Giza 168	CK_leaf_7 days_TAM107	1 hour of drought stress_leaf_7 days_TAM107	6 hour of drought stress_leaf_7 days_TAM107	1 hour of heat stress_leaf_7 days_TAM107	1 hour of drought&heat combined stress_leaf_7 days_TAM107	6 hour of drought&heat combined stress_leaf_7 days_TAM107	CK_shoots_three leaf stage_Manitou	cold 2 weeks (4C)_shoots_three leaf stage_Manitou	CK_roots_Chinese Spring	Phosphorous starvation 10 days_roots_Chinese Spring	CK_shoots_Chinese Spring	Phosphorous starvation 10 days_shoots_Chinese Spring	CK_6h_ChineseSpring	Na_6h_ChineseSpring	CK_12h_ChineseSpring	Na_12h_ChineseSpring	CK_24h_ChineseSpring	Na_24h_ChineseSpring	CK_48h_ChineseSpring	Na_48h_ChineseSpring	CK_6h_QM6	Na_6h_QM6	CK_12h_QM6	Na_12h_QM6	CK_24h_QM6	Na_24h_QM6	CK_48h_QM6	Na_48h_QM6	radicle	Young Leaf	Young Root	Shoot apical meristem	Mature Leaf	Mature Root	Anther	Stigma and Ovary	Seed
TaGRF1-2A	0	0	4.17654	3.7796	5.17043	9.34356	5.86767	3.73884	6.70936	6.49862	5.4019	1.89383	1.00485	3.5581	7.88777	5.56107	11.3272	8.92924	9.32561	8.46743	5.83016	1.60464	4.86738	2.33932	5.29921	3.72891	5.32294	2.78783	2.72638	3.5561	3.66293	2.30796	2.6334	2.62742	2.45046	3.08855	8.83673	7.2672	9.42153	9.29301	7.85963	12.0287	6.31677	11.4509	6.07033
TaGRF1-2B	0	0.186252	2.09117	0.935257	2.10441	1.66384	1.34288	1.37228	1.09578	0.968082	1.68003	0.836892	0.377637	0.864459	2.39947	1.39087	1.80942	2.94589	1.30899	1.36682	0.00011583	0	1.06e-05	4.72468	3.32e-05	3.92715	6.53e-05	3.92125	0.00110398	4.01496	4.75624	3.24098	0.000288608	0.000126109	0.00385005	4.81996	2.34072	0.931352	1.95866	3.7326	1.68892	5.1357	2.67734	6.34445	1.79807
TaGRF1-2D	0.142051	4.3e-06	6.59707	7.68191	9.93736	11.2512	9.10476	6.12442	4.14074	4.05952	3.90192	2.63833	1.31078	4.39189	5.80518	3.804	9.45502	10.1798	5.08844	5.88279	9.80798	4.47976	1.80352	5.29493	7.58308	3.02132	6.33706	0.0163791	0.00220221	5.7826	7.92247	5.88282	9.10808	3.99418	4.66392	5.80469	9.22943	3.37653	8.39535	11.9576	4.63237	8.92564	5.09588	13.6284	4.96402
TaGRF2-2A	0	0	1.06e-05	0.0172535	2.88e-05	5.97e-06	5.87e-05	0	1.15e-05	1.76e-05	0.027741	0	0	0	0	0.000193993	0	0	0.000221131	0.0804147	0	0	0	0	0	0	0	0	0	0	0	0	0	0	0	0	0.000176044	0	0.090876	0.140503	3.9172e-05	2.13e-05	0	0.203817	0.000525493
TaGRF2-2B	0	0	0	0	0	0	0	0	0	0	0	0	0	0	1.1e-05	7.94e-06	0	0	0.130583	0.0308455	0	0	0	0	0	0	0	0	0.179784	0	0	0	0	0	0	0	3.85e-05	0.0885893	0.0733607	0.950248	0	0.114085	0	0.000115029	0.0516693
TaGRF2-2D	0	0.0589103	0	0	0	0	0	0	0	0.0270063	0	0	0	0	0	0.0554157	0.192714	0.227544	0.108004	0.162876	0	0	0	0	0	0	0	0	1.47694	0	0	0	0	0	0	0	0.146627	0.109736	0.297444	1.50914	0.050721	0.117145	0	0.672837	0.217345
TaGRF3-2A	0	0.00555283	0.318951	0.171988	0.186974	0.300218	0.233047	0.217681	0.0662183	0.118781	0.341523	0	0.0229622	0.129235	0.0600531	0.0515138	0.121518	0	0.689646	1.26851	0.521545	0	0.523214	0	0	0	0.378665	0	0	0	0	0	0	0.576783	0	0	0.132473	0.463594	0.0731064	1.37808	0.112278	0.0954304	0.183942	0.755304	0.61222
TaGRF3-2B	0.0150474	0.075736	0.625083	0.174074	0.331345	0.471497	0.562616	0.376714	0.326724	1.05834	1.62482	0.62065	0.931219	0.464145	0.493723	0.434434	0	0	1.74645	2.49486	0	0	0	0	0	0	0	0.988903	0	0.564424	0	0	0	0.859019	0	0	0.0215366	1.02163	0.0104068	1.39651	0.334064	0.0169971	0.150855	1.15161	0.963336
TaGRF3-2D	0.0265346	0.0885684	0.444911	0.320762	0.9094	0.794186	0.632439	0.60843	0.988519	2.71606	1.96854	0.156433	0.226731	0.317581	0.726376	0.380828	0.125802	0.0903647	1.15754	2.24237	0.502411	0	0	0	0	0	0	0.621462	0	0.361079	0.381379	0	0	0	0	0	0.181061	0.863041	0.102195	2.7393	0.186546	0.0819424	0.194939	2.51194	0.45353
TaGRF4-4A	0	0.0295236	0.252105	0.279485	0.410807	0.472258	0.431463	0.36348	0.224062	0.312177	0.450063	0.27089	0.10163	0.189307	0.245703	0.924245	7.4106	7.59572	1.03847	1.37749	11.297	25.6119	6.36353	30.1393	12.2981	17.9584	9.37712	4.2276	9.72407	24.5968	9.40809	25.5391	11.809	9.72029	13.952	7.22064	5.64535	0.735869	5.72637	9.60866	0.0960827	3.6655	0.0550661	8.05443	2.46547
TaGRF4-4B	0.0260209	0.00784807	0.0782456	0.13705	0.152953	0.184299	0.174618	0.115164	0.189898	0.181459	0.243181	0.593566	0.366011	0.131648	0.952261	2.17475	5.53932	7.41868	0.790125	1.06501	11.9911	26.2576	10.878	15.976	13.9811	14.274	9.08737	6.7728	12.7396	24.7871	10.6394	17.1415	10.0158	14.0915	0	2.9148	5.11888	0.63635	4.92564	7.57573	0.0896646	2.49493	0.113053	5.19354	3.37185
TaGRF4-4D	0.0181446	0	0.135021	0.245737	0.431554	0.167564	0.129426	0.0871198	0.156314	0.2508	0.494515	0.201266	0.163876	0.312675	0.180501	0.53431	5.69515	6.436	0.696935	1.13632	9.30956	17.5824	7.05925	20.885	7.79893	12.9175	6.66865	2.79919	10.0275	20.5215	11.6856	18.207	13.764	8.22683	0	2.14734	5.90331	0.56113	5.13406	7.72449	0.125444	2.77354	0.0278209	5.89093	2.83677
TaGRF5-4A	0.201044	0	0.235859	0.19725	0.571098	0.884405	0.260056	0.194999	0.388161	0.368194	0.363256	0.037691	0.171591	0.814707	0.642129	0.28424	2.76498	2.50839	0.917138	1.16832	0.736413	4.06624	1.11732	1.23559	2.22569	0.949711	0.606345	0	0.657073	1.60919	1.13449	1.40031	2.2263	0.843083	0.403424	0.501956	4.52438	1.30152	3.53193	18.3449	0.668578	2.26376	1.20028	4.2597	1.01551
TaGRF5-4D	0.133264	0.189605	0.425267	0.695097	1.40553	0.899198	0.870444	0.340556	0.79872	0.860932	0.60724	0.120382	0.269904	1.73743	1.01758	0.145192	2.83671	2.55547	0.946491	1.30204	1.57507	1.58687	2.00115	1.3262	0.681778	1.37169	1.65287	0	2.81452	2.60493	1.55639	1.14797	1.71664	0.462351	0	1.09783	3.12459	2.62146	2.59546	21.4733	1.6014	3.19303	2.05417	2.72925	1.59602
TaGRF6-4A	0.0356341	0.150284	0.375182	0.204225	0.525298	0.648558	0.464006	0.296396	0.816267	0.67733	0.544985	0.251677	0.234896	0.669217	0.961256	1.32202	2.47503	2.48037	0.818996	1.02188	2.25444	3.17367	2.26394	4.54296	1.90355	1.84364	2.2548	0.998025	3.36441	4.9594	0	2.95992	1.94556	0.852693	0	1.86106	2.94251	1.45105	2.76516	8.13774	0.911337	1.43187	0.634153	1.51047	1.45341
TaGRF7-6A	0	0.0291357	0	0	0	0	0	0	0	0	0	0	0	0	0	0	0	0	0	0	0	0	0	0	0	0.74748	0	0	0	0	0	0	0	0	0	0	0	0.0133894	0	0	0	0	0	0	0
TaGRF8-6A	0	0.0668383	0.0534895	0.0185849	0.0369874	0.0633705	0.106101	0.102019	0.0995025	0.133202	0.156728	0.0372632	0	0.051797	0	0.0148811	0.470547	0.336359	0.24179	0.409033	0	0	0	0	0	0	1.33973	0	0	0	1.35316	0	0	0	0	0	0.331763	0.0909488	0.35065	2.31109	0.179708	0.172453	0.022228	0.407269	0.0291089
TaGRF8-6B	0	0	0	0	0	0	0.0417163	0	0	0	0	0	0	0	0	0.119192	0.351257	0.876829	0.059895	0.146621	0	0	3.6213	0	0	0	0	0	0	0	2.78023	0	0	0	0	0	0.239458	0.0182132	0.329059	1.4189	0	0.194515	0	0.049338	0.136487
TaGRF8-6D	0	0	0.018113	0	0	0	0	0	0.0115094	0	0.0274414	0.0189305	0.0710882	0	0.0232472	0.264625	0.566848	0.311909	0	0	0	0	3.44479	0	0	0	0	0	0	0	0	3.4266	0	0	0	0	0.130335	0.0951966	0.0893083	1.50819	0.0169308	0.177686	0	0.153945	0.158877
TaGRF9-6A	0	0.0281563	0.0429853	0.0548769	0.0777685	0.189362	0.0728586	0.0716061	0.0780489	0.0440871	0.0549586	0.0230785	0	0.0070715	0	0	0	0	0.134129	0.183973	0	0	0	0	0	0	0	0	0	0	0	0	0	0	0	0	0	0.10909	0.00941453	1.43182	0.0140028	0	0	1.22628	0.476917
TaGRF9-6B	0.024965	0.0975191	0.285772	0.0341656	0.0688126	0.196358	0.230436	0.0420225	0.150835	0.102749	0.0593952	0.0417896	0.0200786	0.0204965	0.305383	1.56746	0	0	0.361258	0.408485	0	0	0	0	0	0	0	0	0	0	0	0	0	0	0	0	0.036128	0.279065	0	0.932992	0.194198	0.0128069	0.150957	1.2893	0.374832
TaGRF9-6D	0.0413637	0.0612337	1.16231	0.645931	0.969709	1.53943	1.72768	0.820988	0.895656	0.444038	0.390642	0.126563	0.10298	0.431258	0.995548	1.45625	0.0866043	0.0400447	1.00761	2.68302	0	0	0.706081	0	0	0	0.510863	0	0	0	0.532518	0	0	0	0	0	0.0402205	0.436131	0.0283344	1.87278	0.445072	0.057448	0.262371	2.04043	0.718178
TaGRF10-6A	0	0.0254781	0	0	0	0.0156719	0	0.0194529	0	0.0487744	1.43467	0	0	0	0	0	4.04729	3.42975	0.0380028	0.463069	10.2912	8.93797	5.90231	4.22814	6.16373	1.9445	6.68086	0	10.5191	9.22066	7.21837	11.611	7.14744	1.10019	0	0	3.91182	0.191032	2.96268	6.31149	0	1.19389	0	5.78515	0.427206
TaGRF10-6B	0	0.0248323	0	0	0.013244	0	0	0	0	0	0.221811	0	0	0	0	0.0097877	2.0421	1.91223	0.0800323	0.459405	6.07359	4.75677	7.79608	14.3789	4.33928	1.36266	3.65029	0	2.34115	1.89952	2.0122	0.86003	1.48778	1.94144	0	0	1.49744	0.186498	0.882188	4.0586	0	0.569877	0	4.09436	0.148119
TaGRF10-6D	0	0.0147771	0.0267146	0	0	0.0716303	0	0.0584998	0.0223358	0.0811035	1.86502	0	0	0	0.00329074	0.0101348	2.27527	2.48857	0.26465	0.437636	2.51157	6.39099	4.18184	7.27678	1.39697	1.31877	0.59181	0	7.5307	7.93212	3.89542	4.14521	1.43827	1.87493	0	0	2.71164	0.435322	1.96791	9.69367	0.00638597	0.873098	0.0357217	6.49634	0.319911
TaGRF11-7A	0	0.0003692	0.0975521	0	0	0.119752	0.0432746	0.139241	0.102276	0.18107	0.296189	0	0.114998	0.315295	0.295679	0.327906	3.08798	2.64347	0.357827	0.573345	2.22684	5.46	0.0116809	7.67372	0.000240496	2.43882	2.78351	0.000351097	2.65307	8.29e-05	0.000152344	3.65016	2.55841	0.000322775	0	0.000285137	2.93104	0.889895	2.25905	7.73225	0.645881	1.23721	0.173891	2.08399	0.513238
TaGRF11-7D	0.0399578	0.044255	0.347469	0.357886	0.595553	0.843688	0.642011	0.328385	0.650621	0.616069	0.480315	0.0317676	0.108763	0.585658	1.34381	1.77824	2.58899	1.94277	0.487825	1.20456	2.19653	2.30622	0.734867	6.29748	6.80752	3.00222	2.75642	2.93236	4.57998	3.75152	6.23914	2.15771	5.67987	0.83089	0	0	3.83224	1.72647	3.44183	10.3798	1.07325	2.13618	0.251705	3.03755	2.3205
TaGRF12-7A	0	0	0	0	0	0	0	0	0	0	0	0	0	0	0	0	0	0	0	0.0548663	1.16501	0	0	0	0	0	0.83277	0	0	0	0	0	0	0	0	0	0.126049	0.088614	0.075558	3.19158	0	0	0	2.67252	0.53449
TaGRF12-7B	0	0	0	0	0	0	0	0	0	0	0	0	0	0	0	0	0.137514	0	0	0.0505737	0	0	1.13074	0	0	0	0	0	0	0	0	1.12431	0	0	0	0	0.0286532	0.0620147	0.062224	2.59995	0	0.0118273	0	1.87114	0
TaGRF12-7D	0	0.035343	0	0	0	0	0	0	0	0	0	0	0	0	0	0	0.222338	0.168274	0	0.0448857	1.12073	1.20538	1.11684	0	0	0	0.786772	0	0	0	0	1.08789	0.946866	0	0	0	0.0930681	0.0641073	0.200228	1.46914	0	0	0	1.36956	0.13121
